# Supplementary material for: 3D-Printing of Capsule Devices as Compartmentalization Tools for Supported Reagents in the Search of Antiproliferative Isatins
Source: MDPI journal article supplement (doi:10.3390/ph16020310), 2023-02-16
Supplement: s1 [file s1]

# **3D-Printing of Capsule Devices as Compartmentalization Tools for Supported Reagents in the Search of Antiproliferative Isatins**

## **Supplementary Material**

### **Table of contents:**

|                                                                              |     |
|------------------------------------------------------------------------------|-----|
| 1. Figure S1. Detailed 3D-printing process of a bicompartmental capsule..... | S1  |
| 2. Figure S2: EDX and FESEM data for IRA-120-Cu(0) and IRA-Pd(0).....        | S2  |
| 3. RMN spectra of the related compounds.....                                 | S2  |
| 4. ESI-masas spectra of the related compounds.....                           | S14 |
| 5. X-ray crystallographic data of compound <b>17</b> .....                   | S26 |

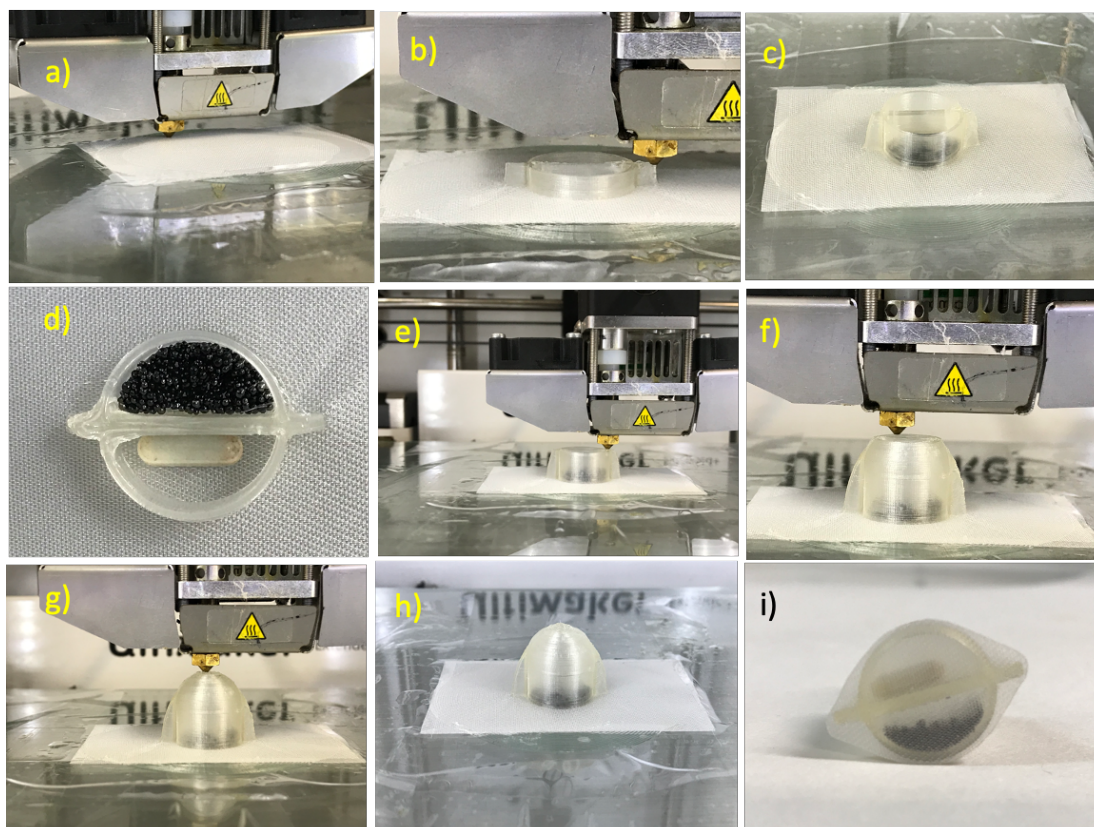

**Figure S1.** a) Porous polypropylene membrane placed at the base of the platform just before the start of the 3D-printing process. b) image at 5 min. c) moment of pause in the 3D-printing and loading of the catalytic material and the magnetic stirrer. d) Parietal view of the capsule at the time of paused loading. e, f) resumption of 3D-printing. g) final moment of 3D-printing (23 min). h) finished capsule. i) View of the porous area after cutting the excess membrane part with scissors.

**Figure S2 a) EDX and FESEM data of IRA-120-Cu(0)**

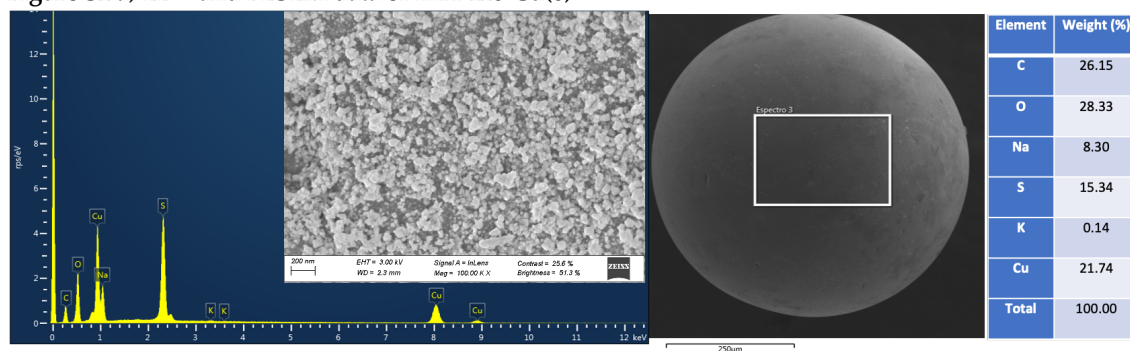

**Figure S2 b) EDX and SEM data of IRA-120-Pd(0)**

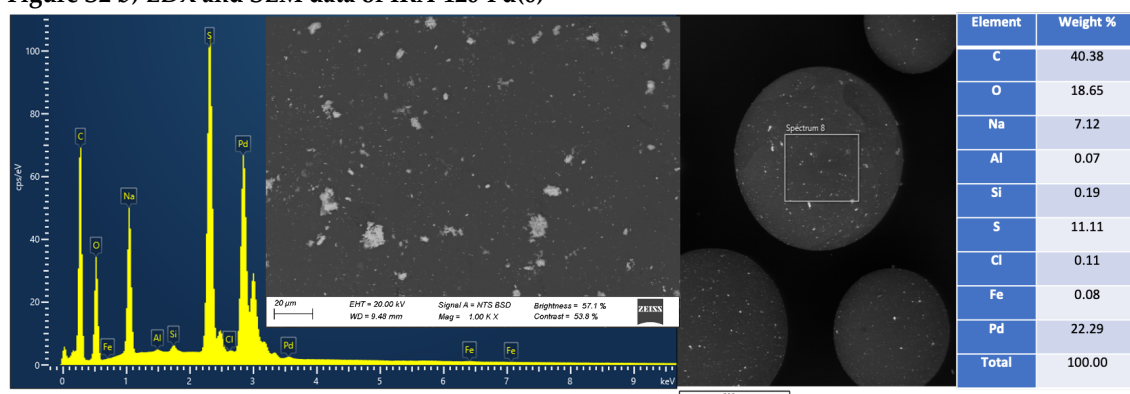

### 3. RMN spectra of the related compounds

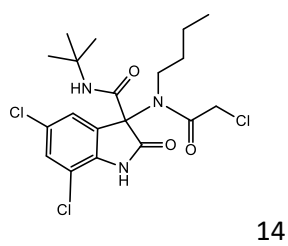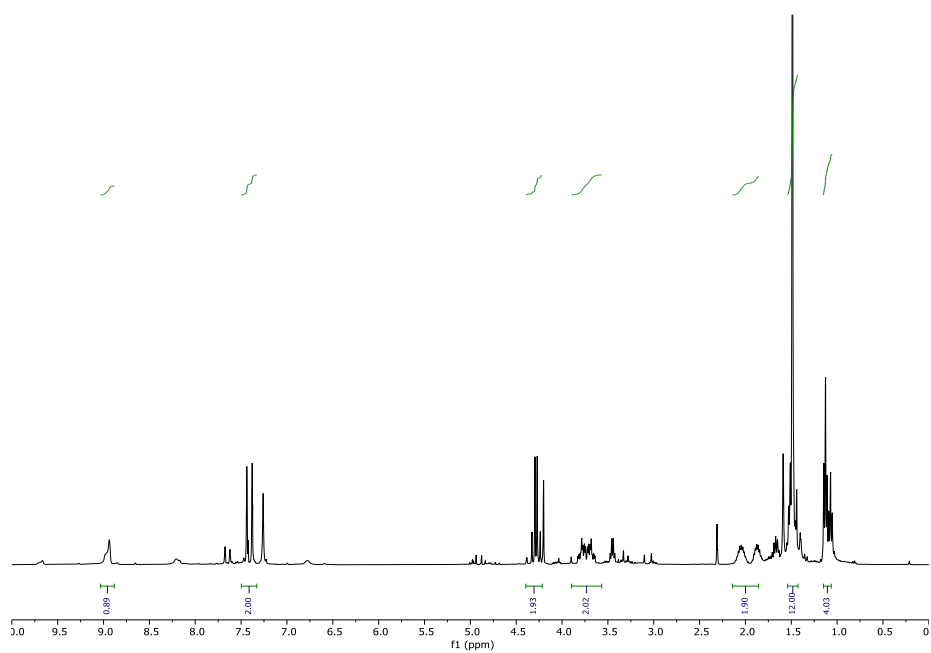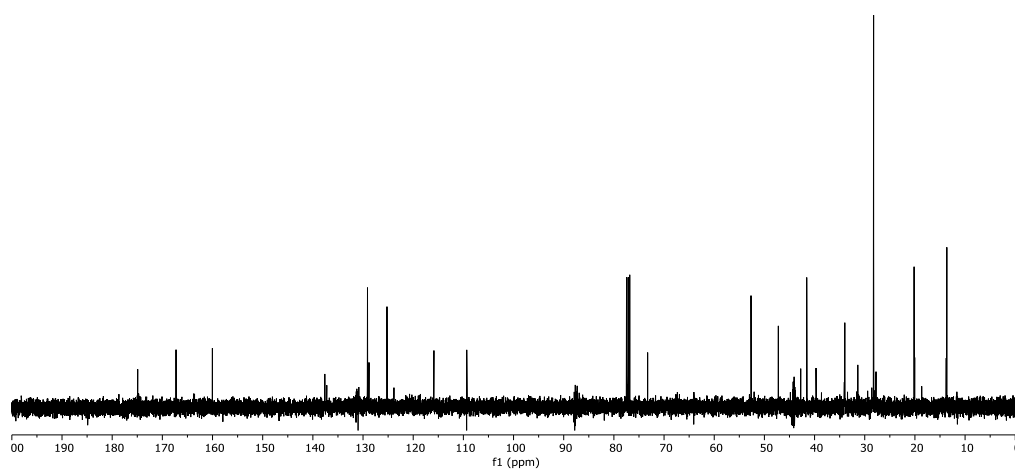

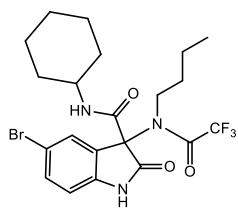

15

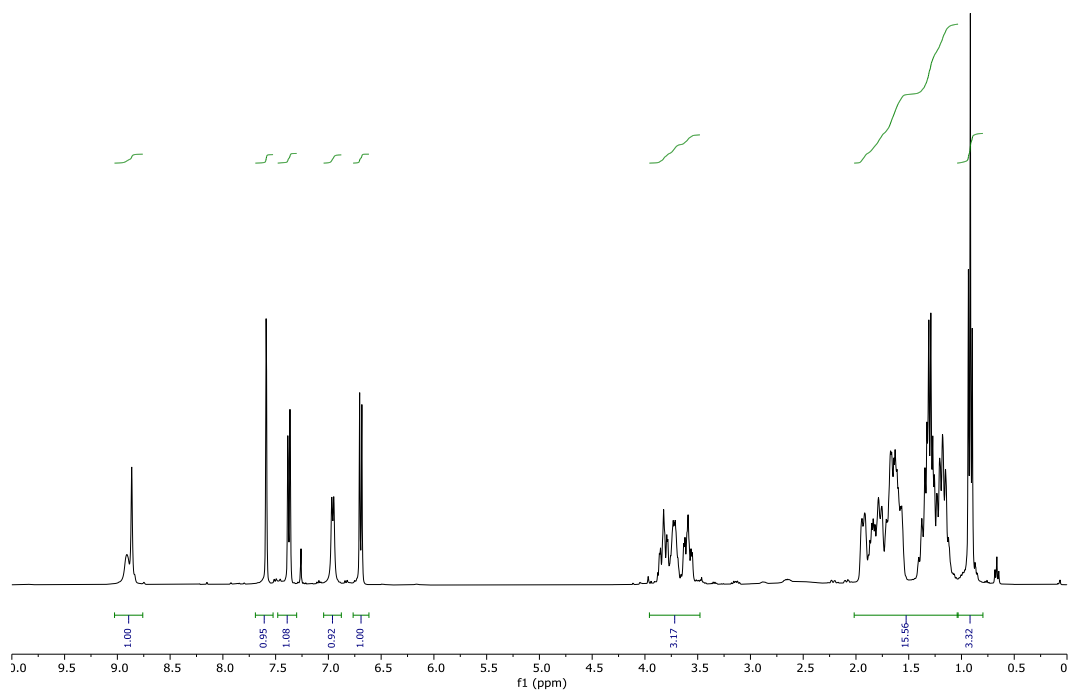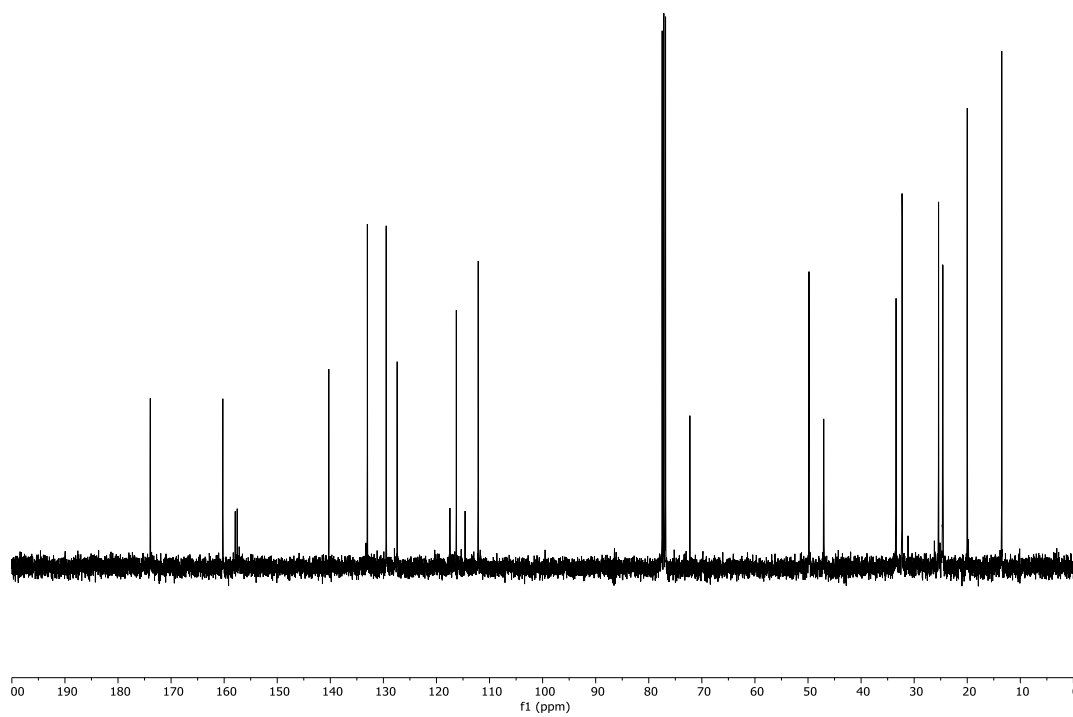

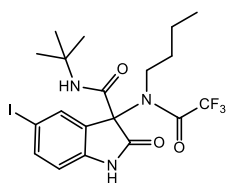

17

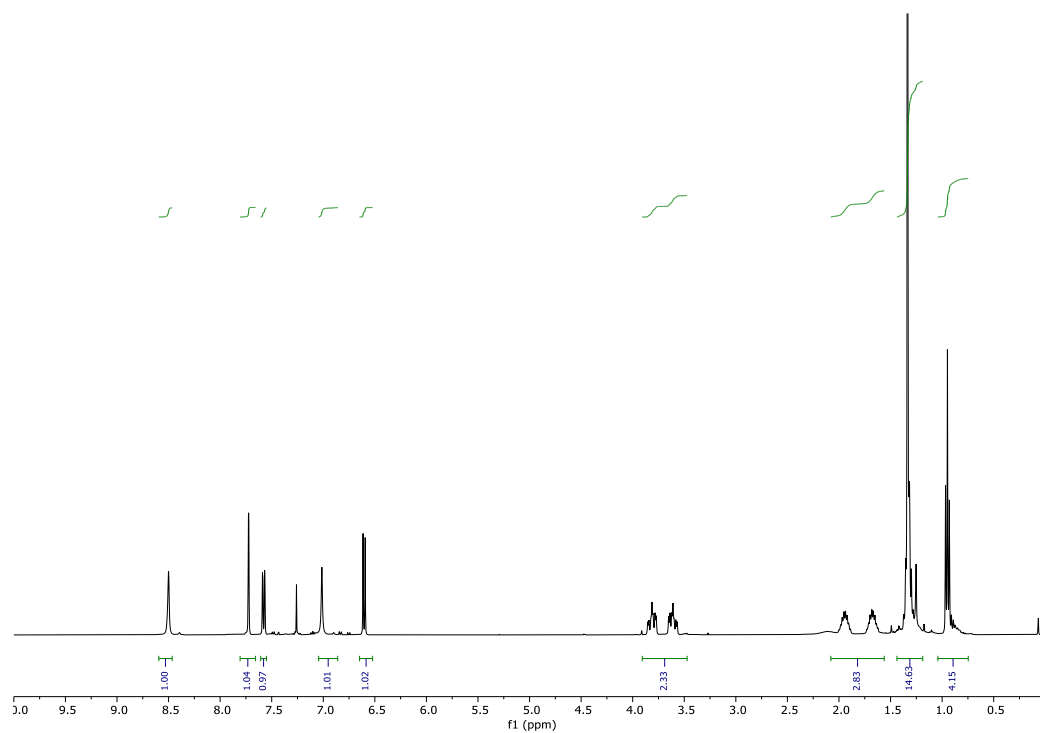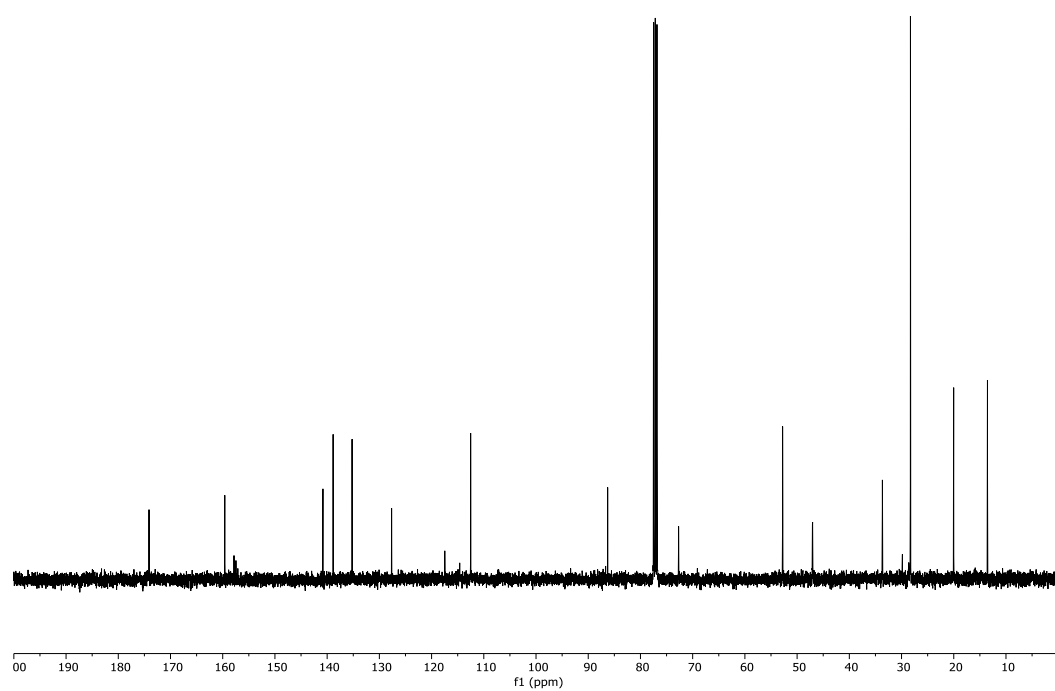

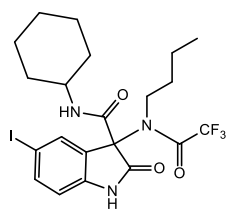

18

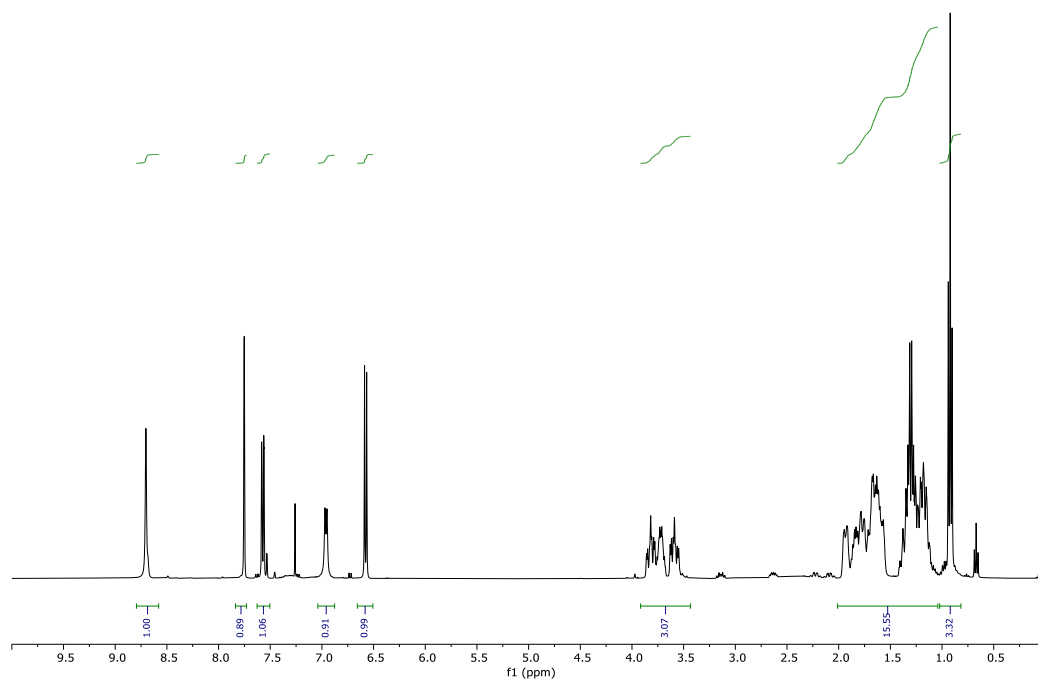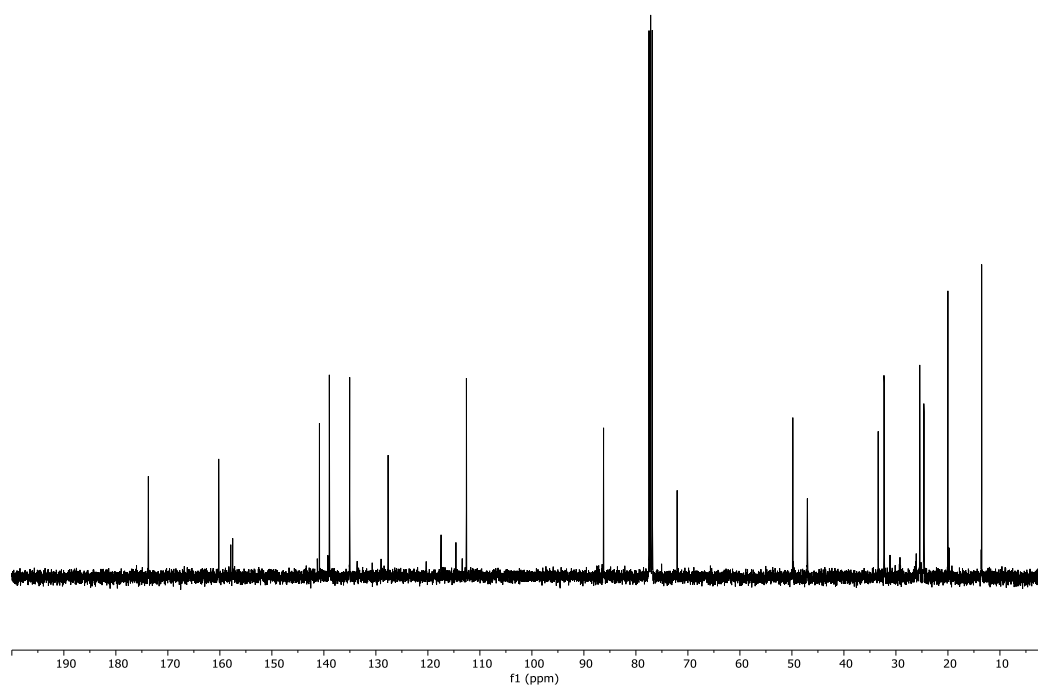

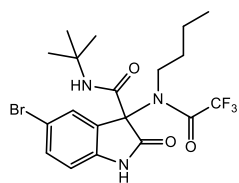

19

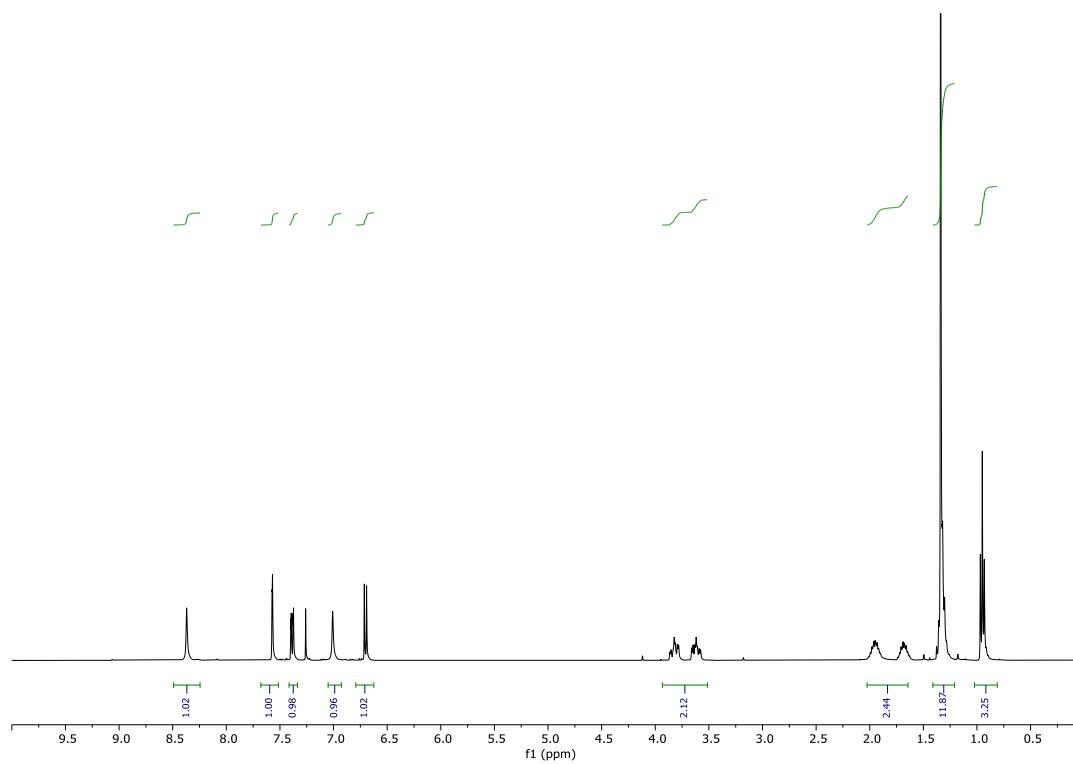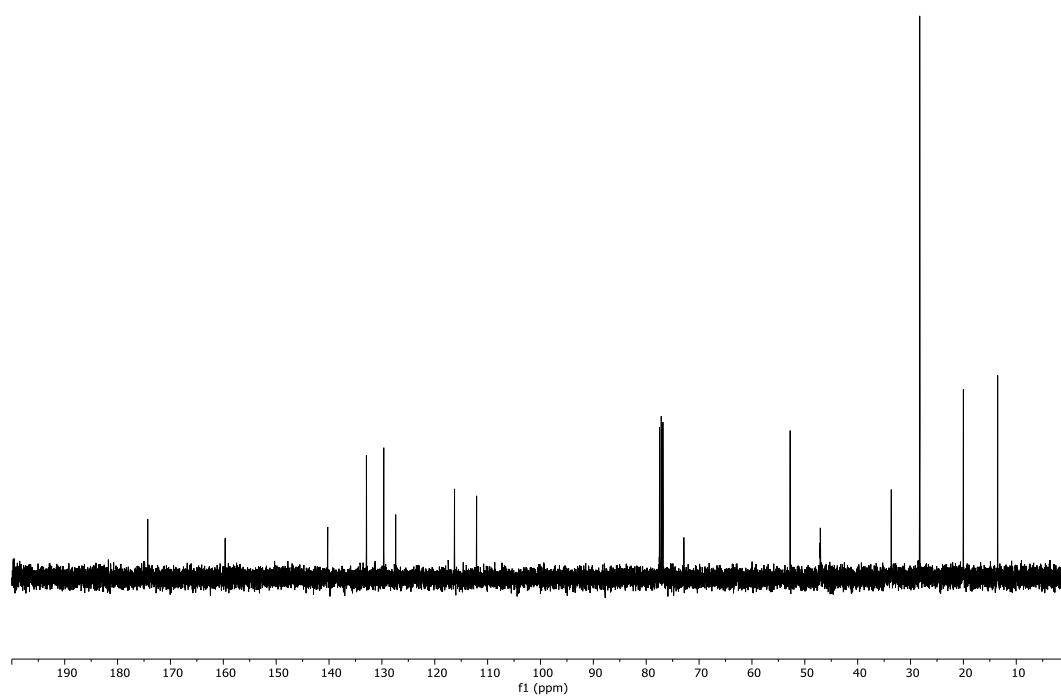

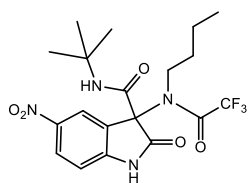

20

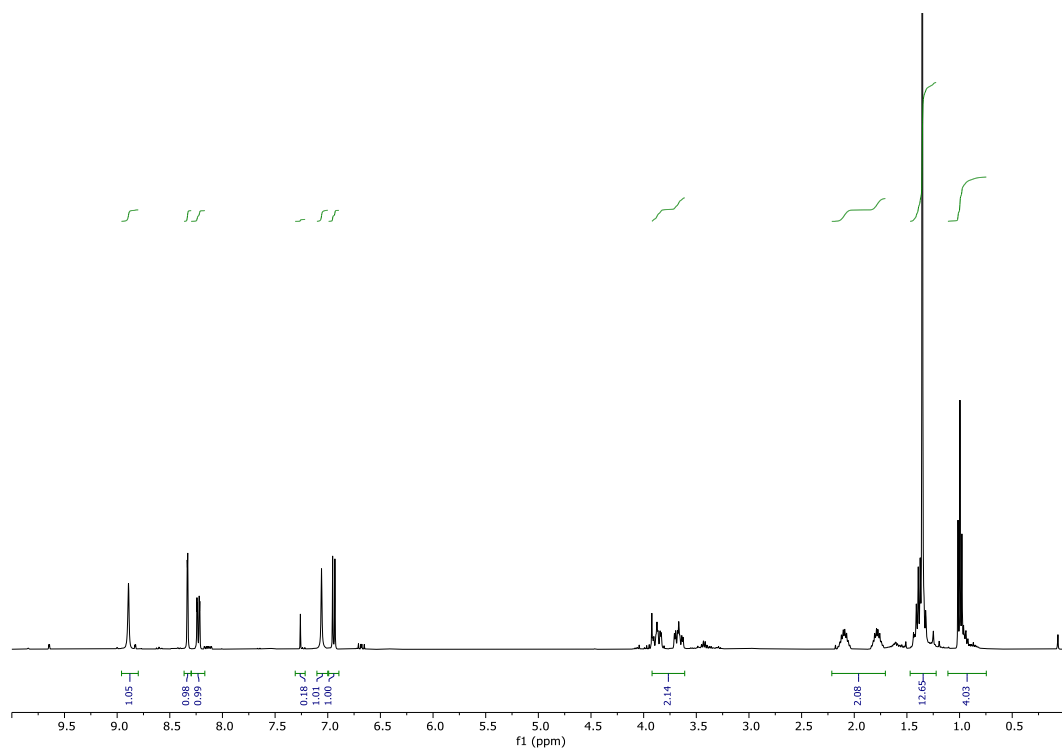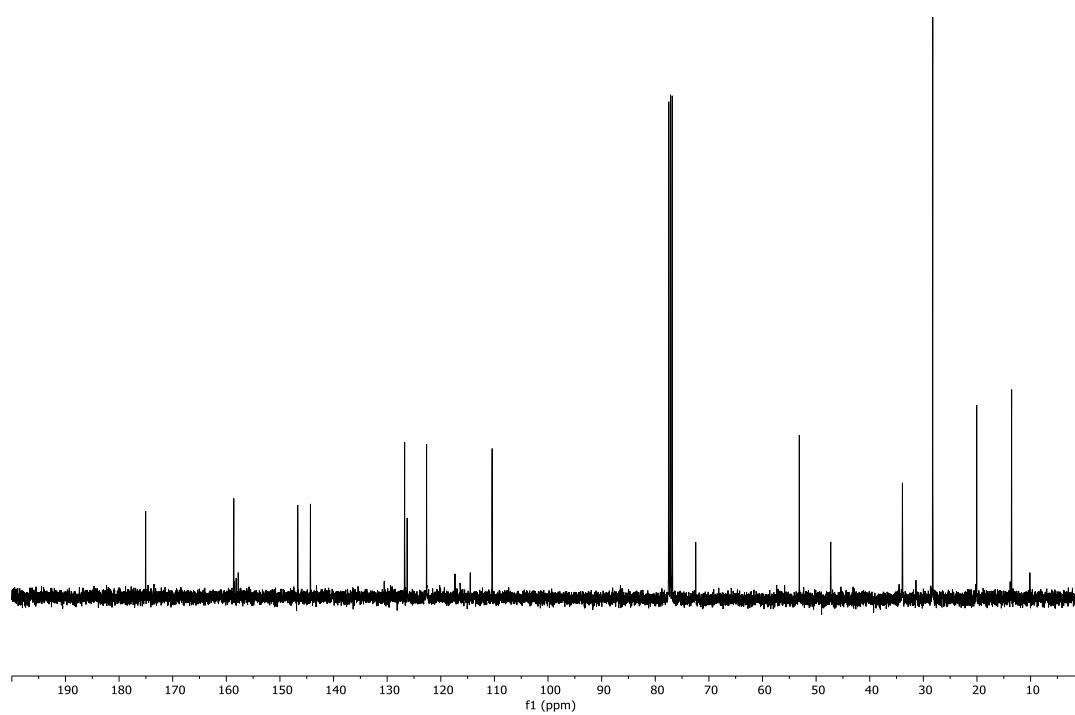



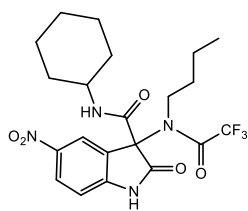

21

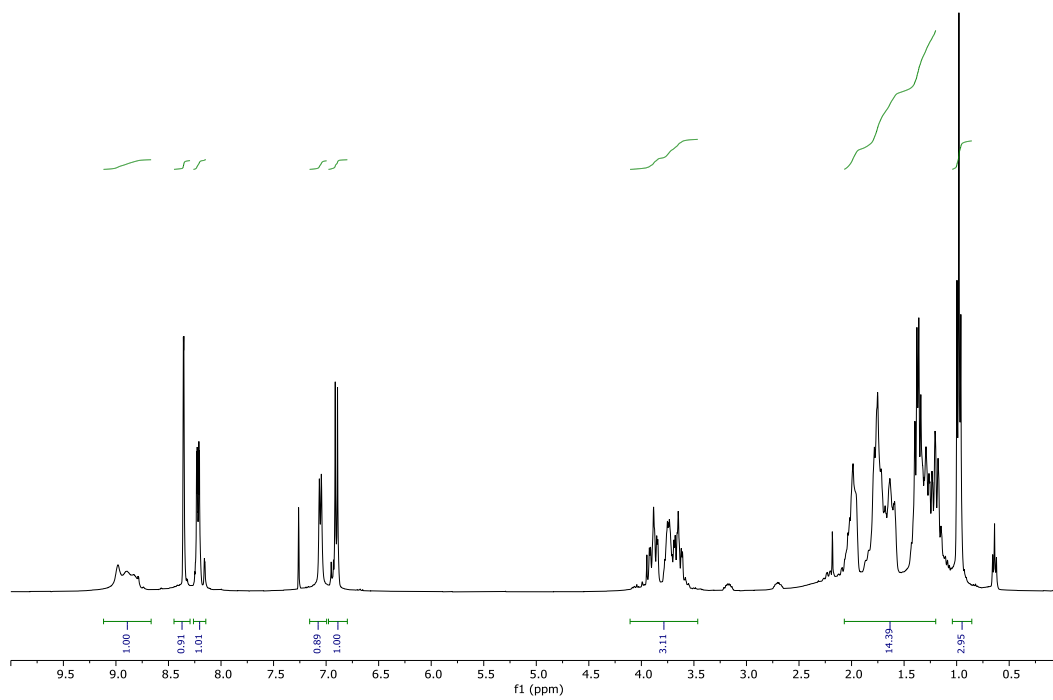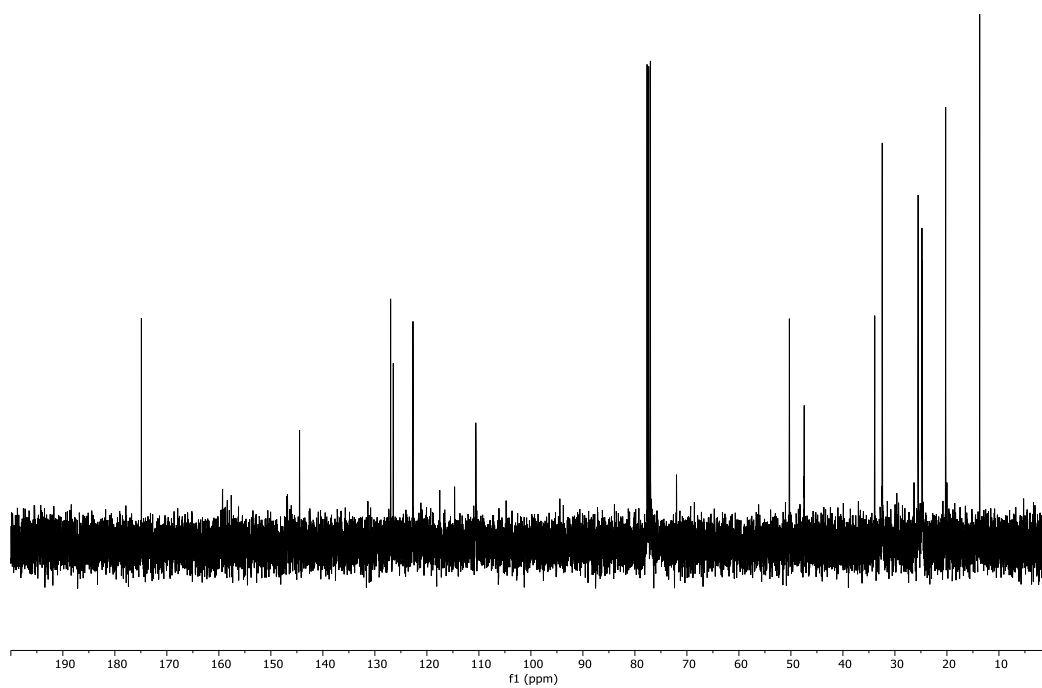

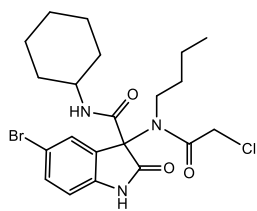

22

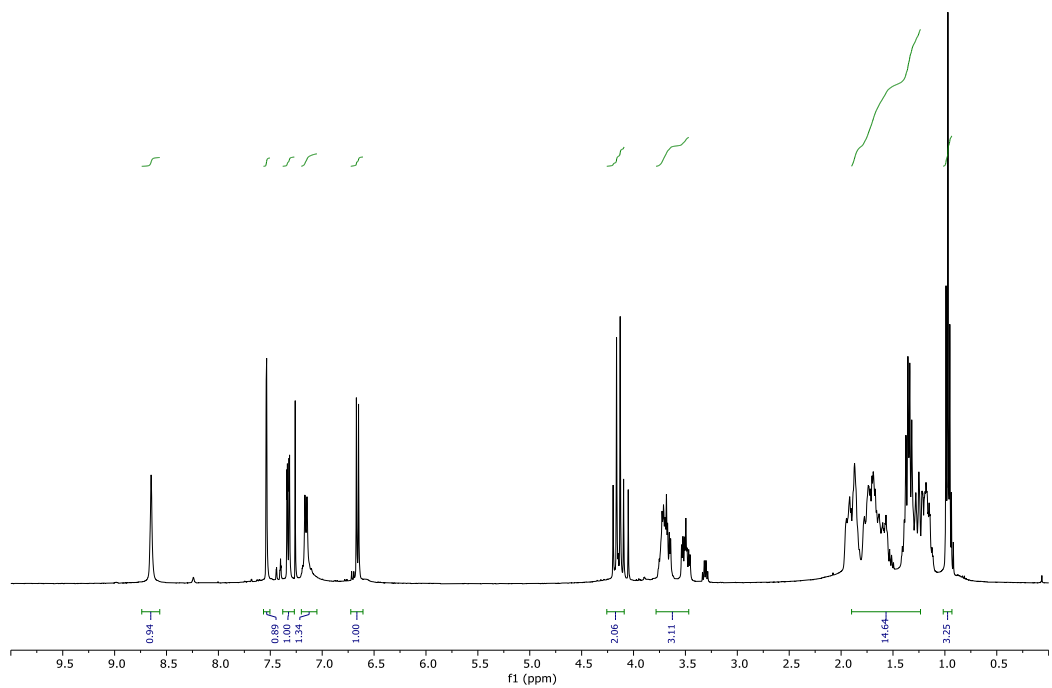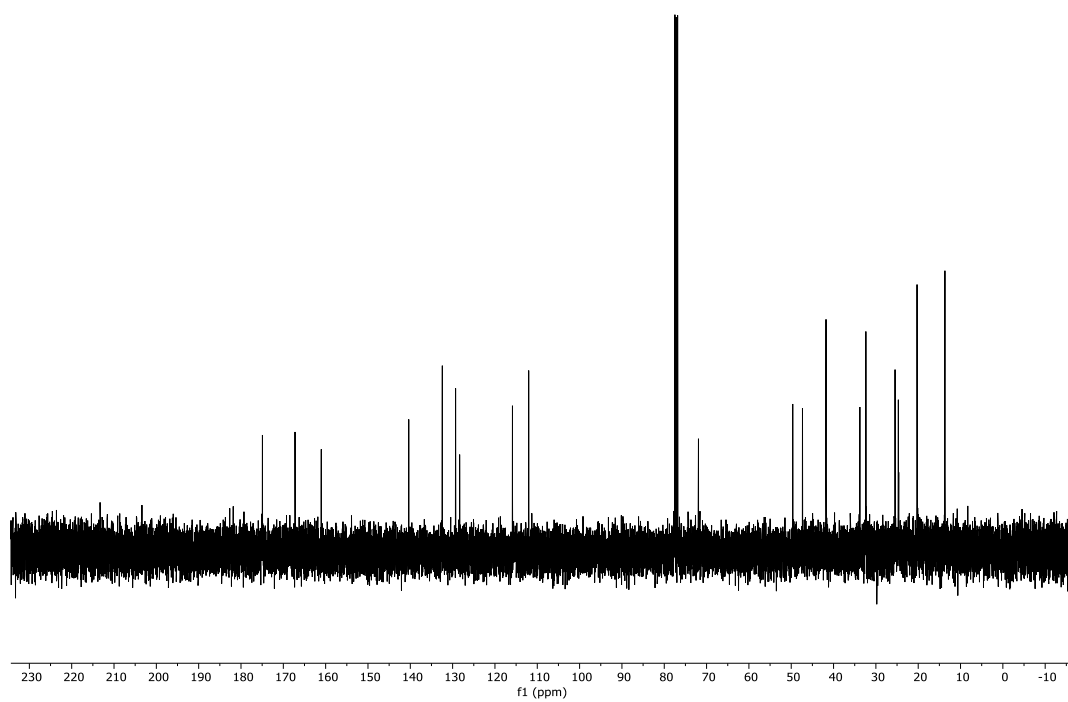

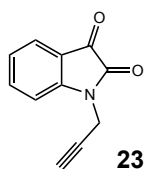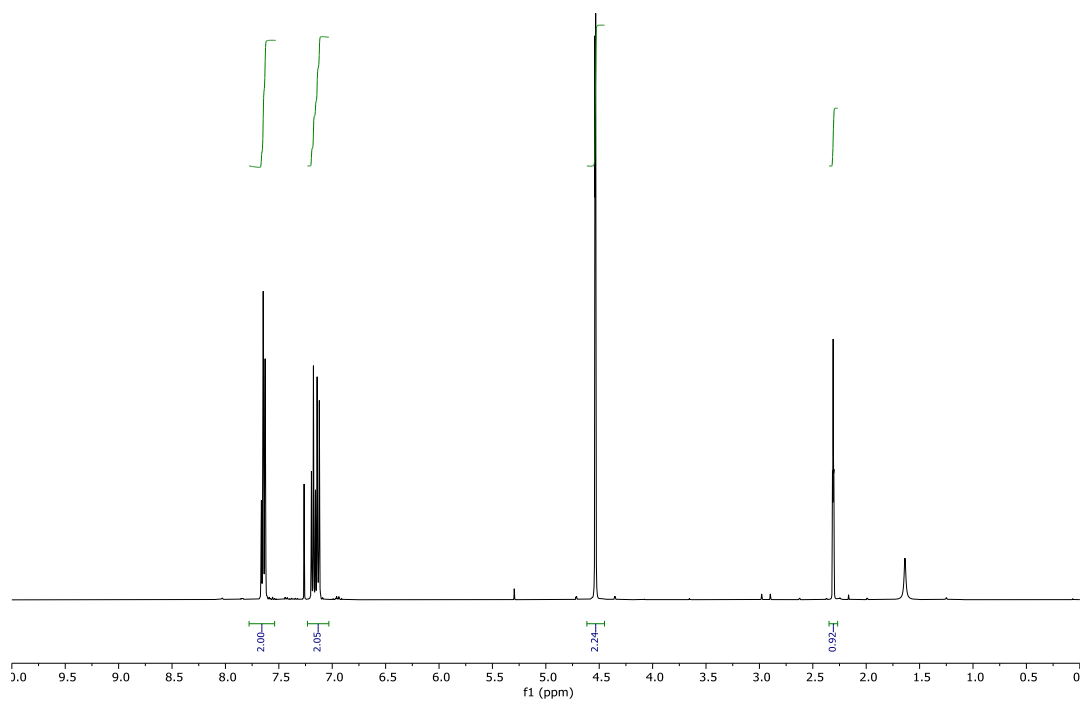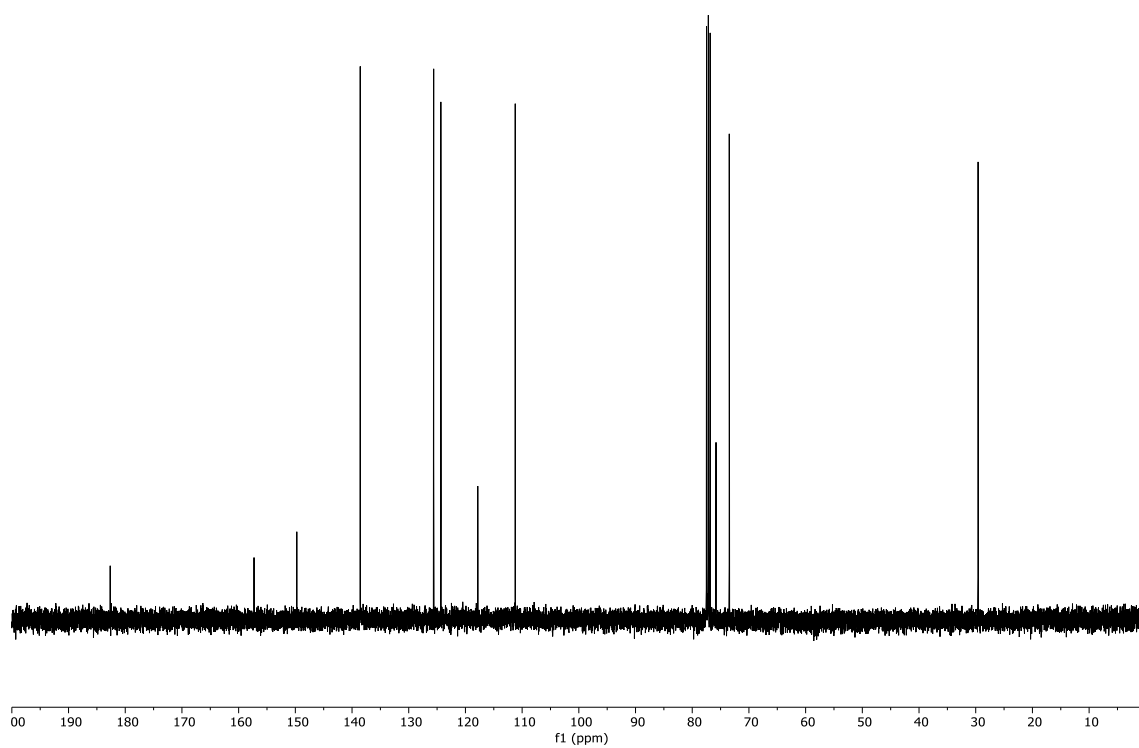

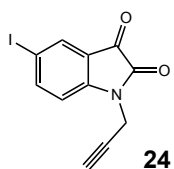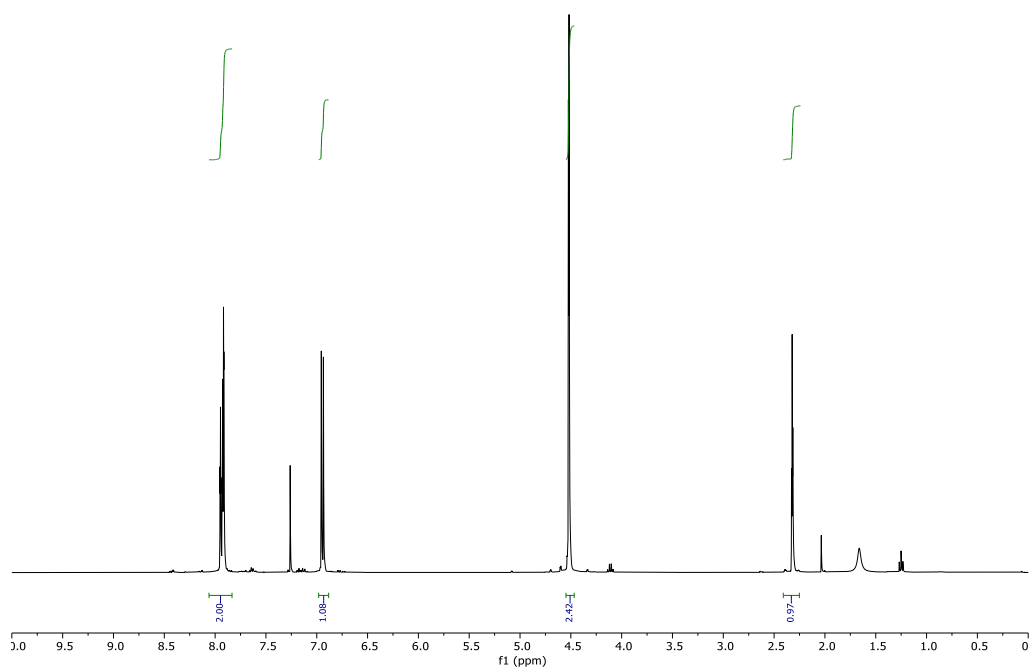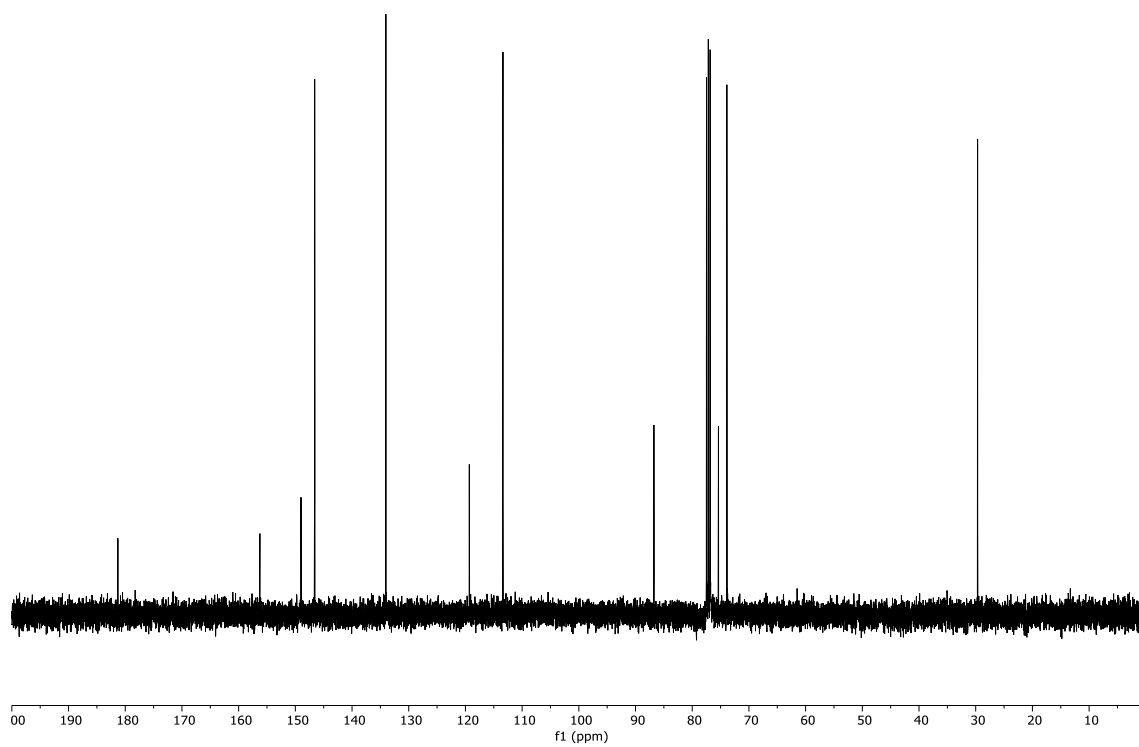

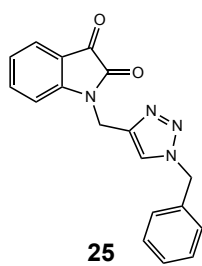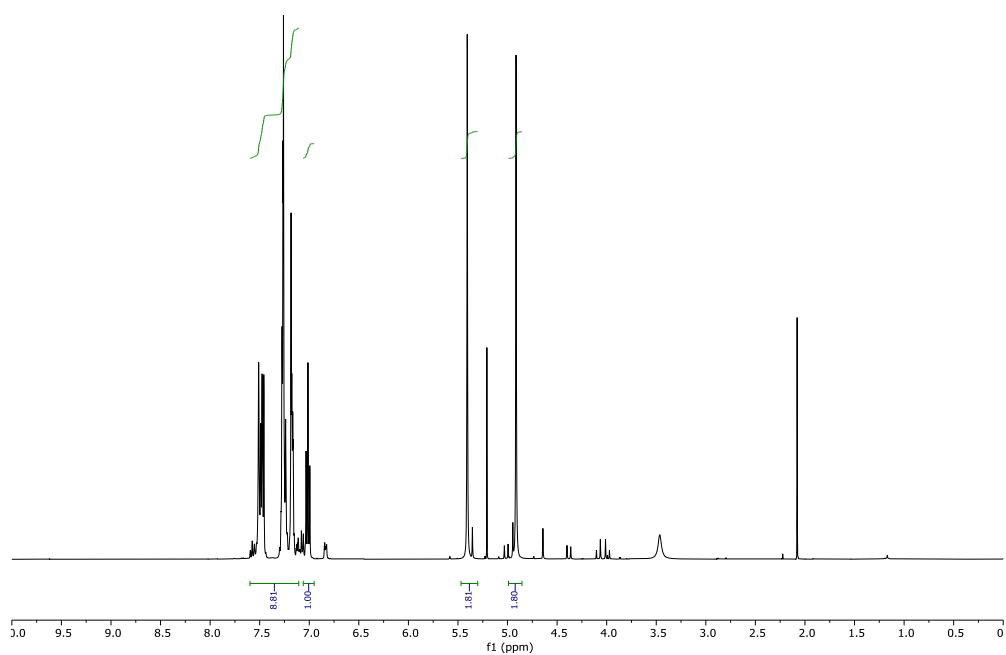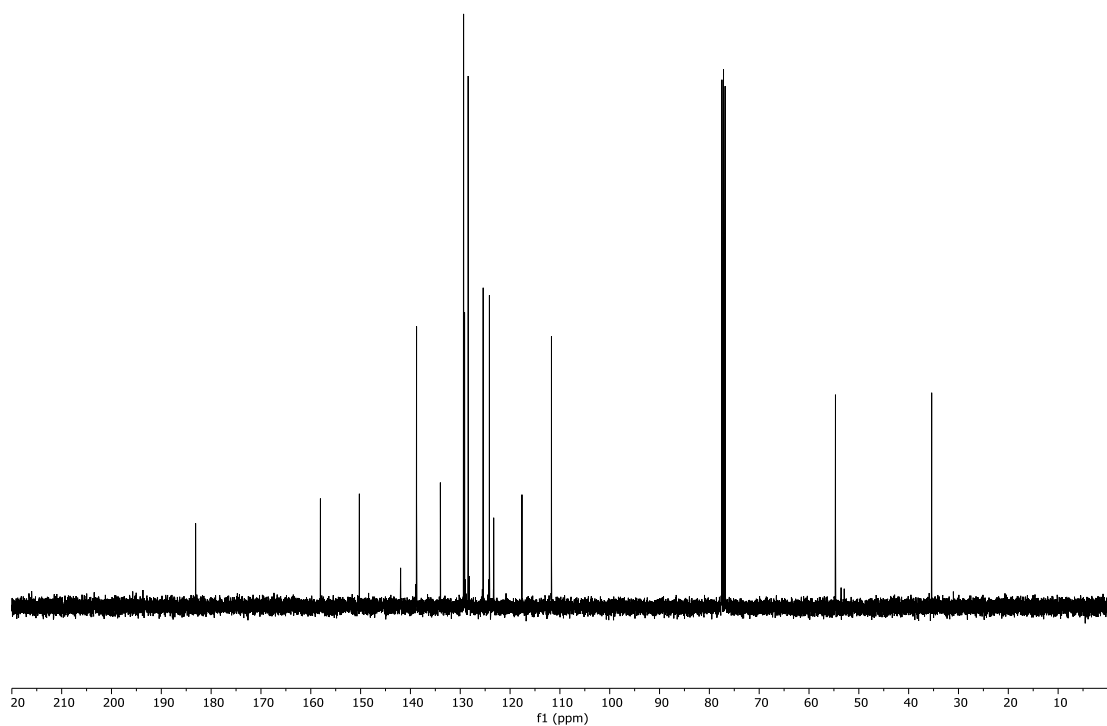

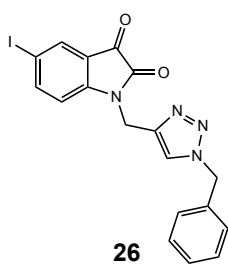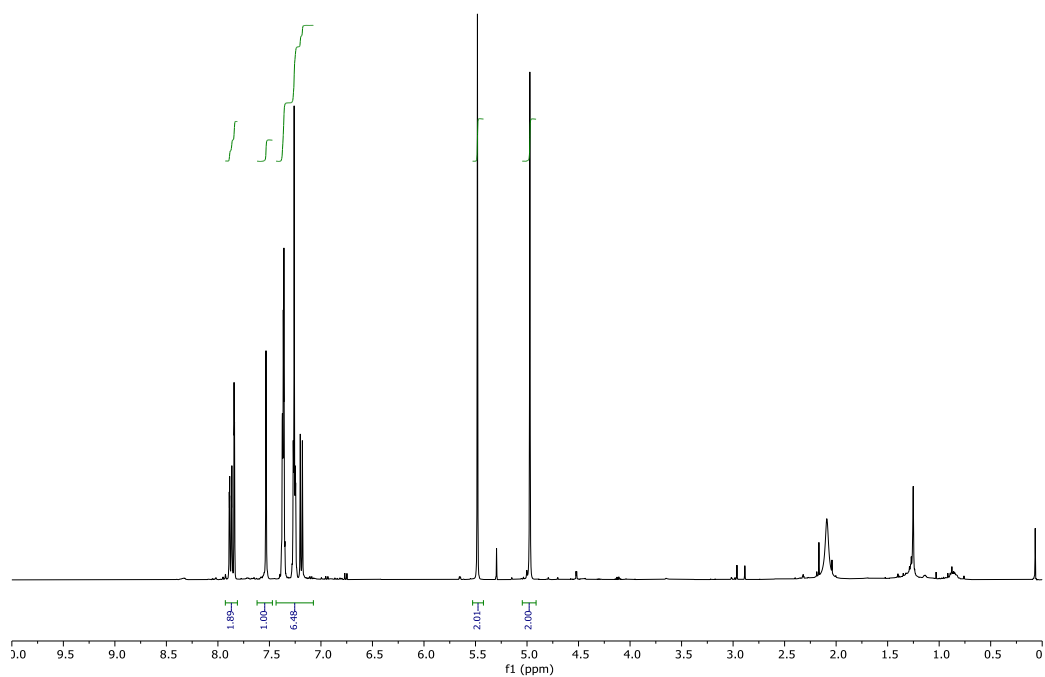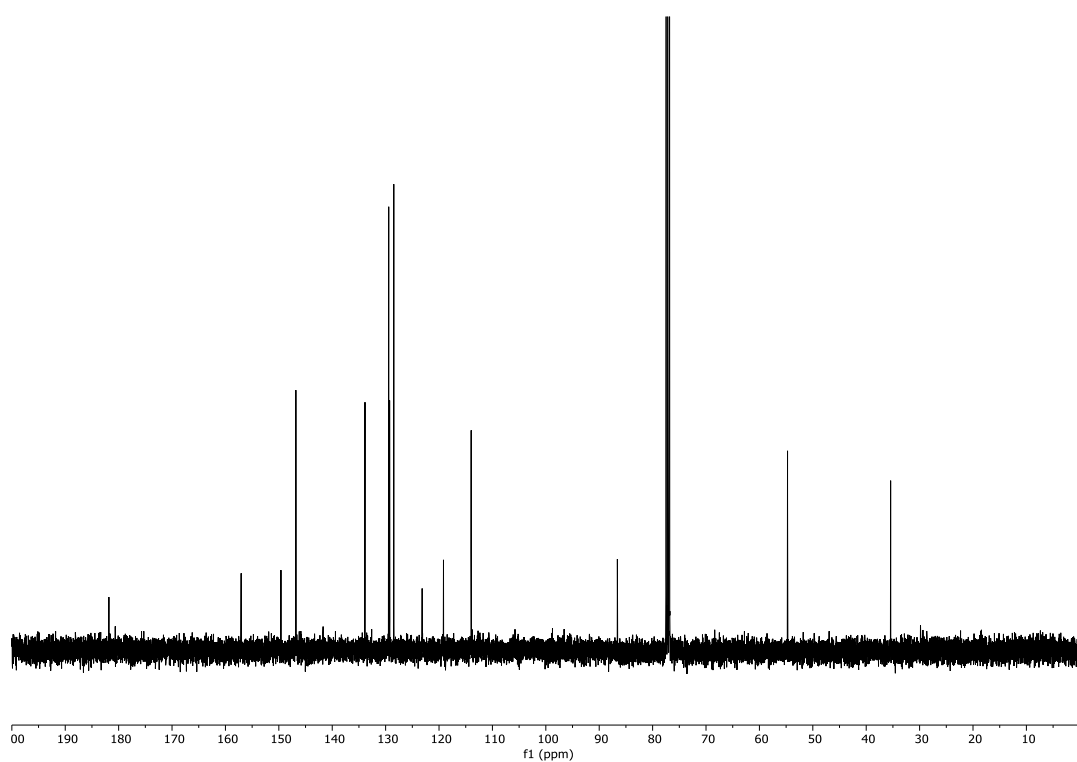

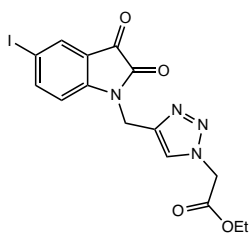

**27**

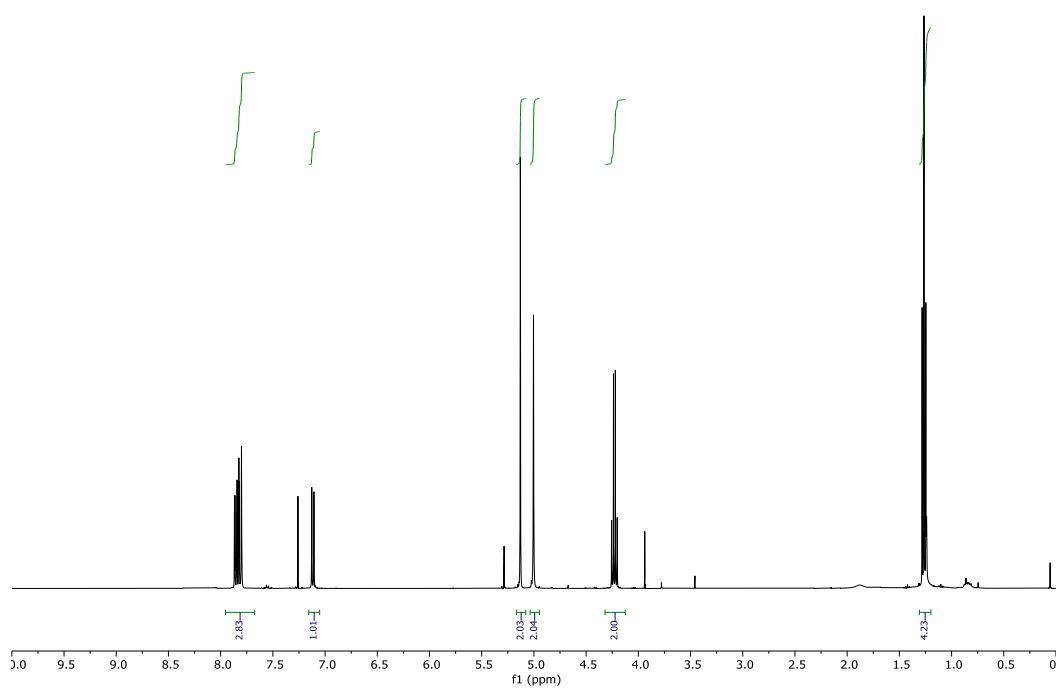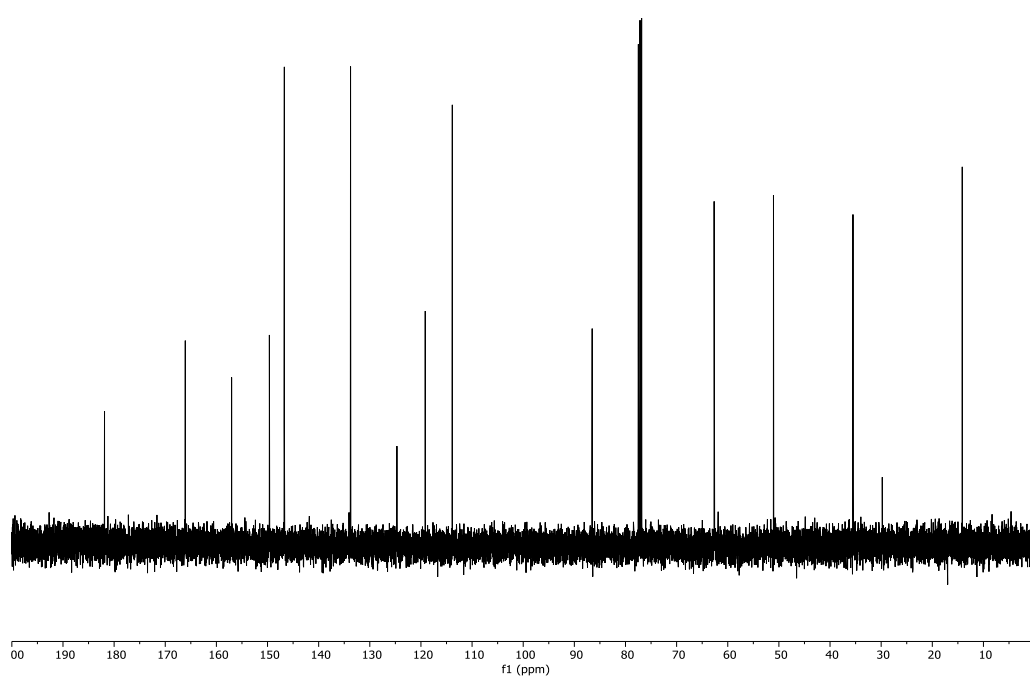

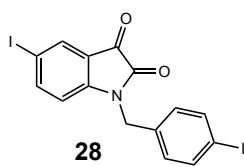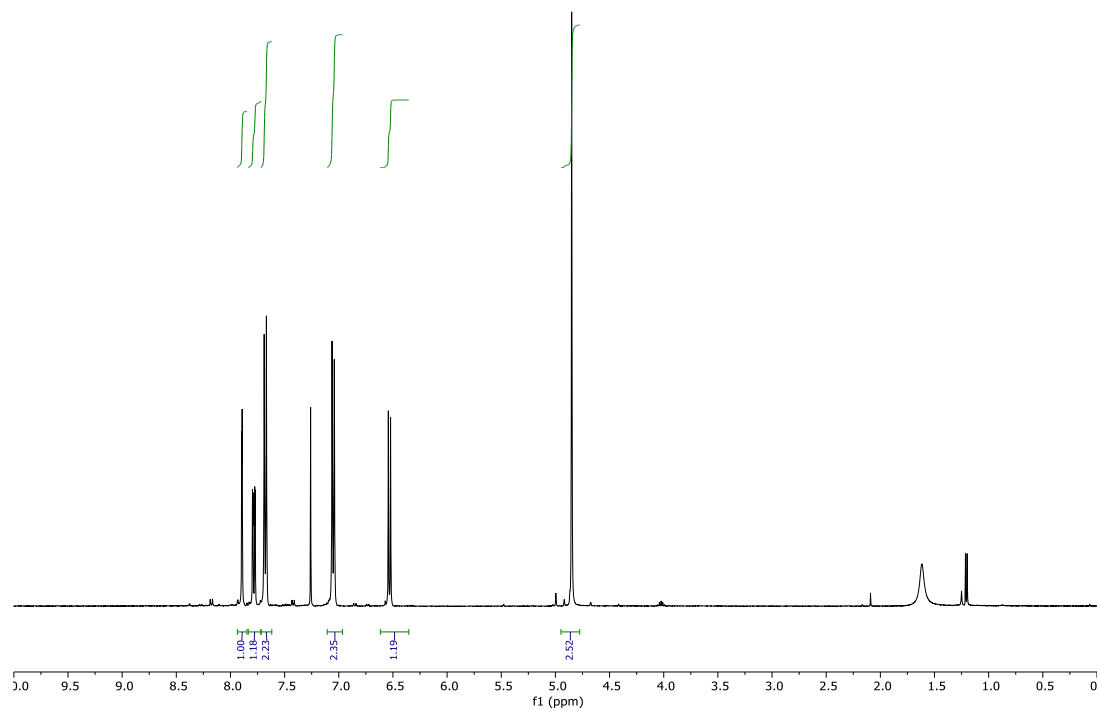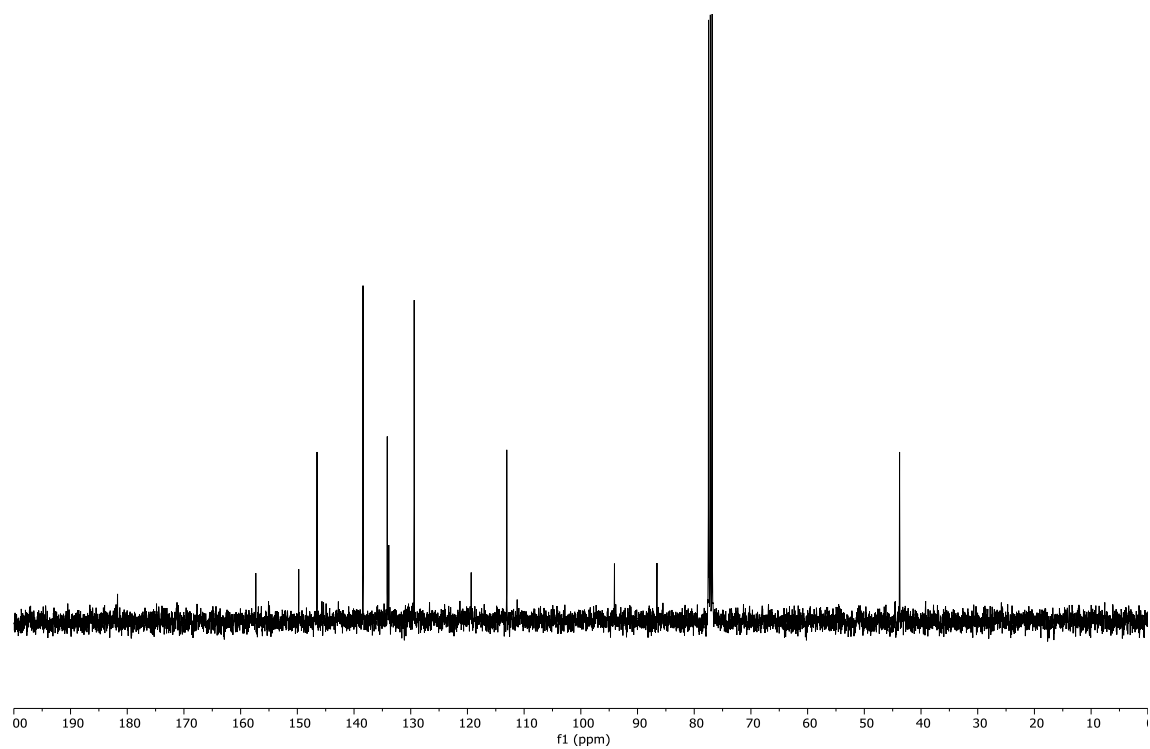



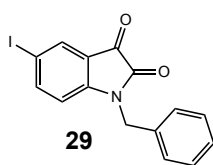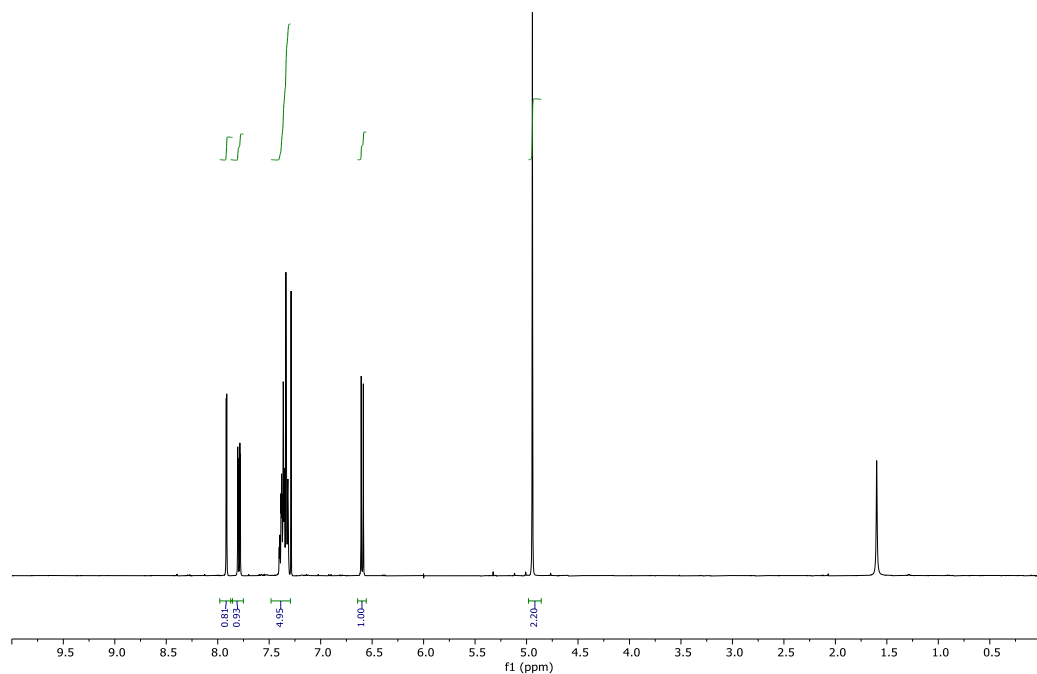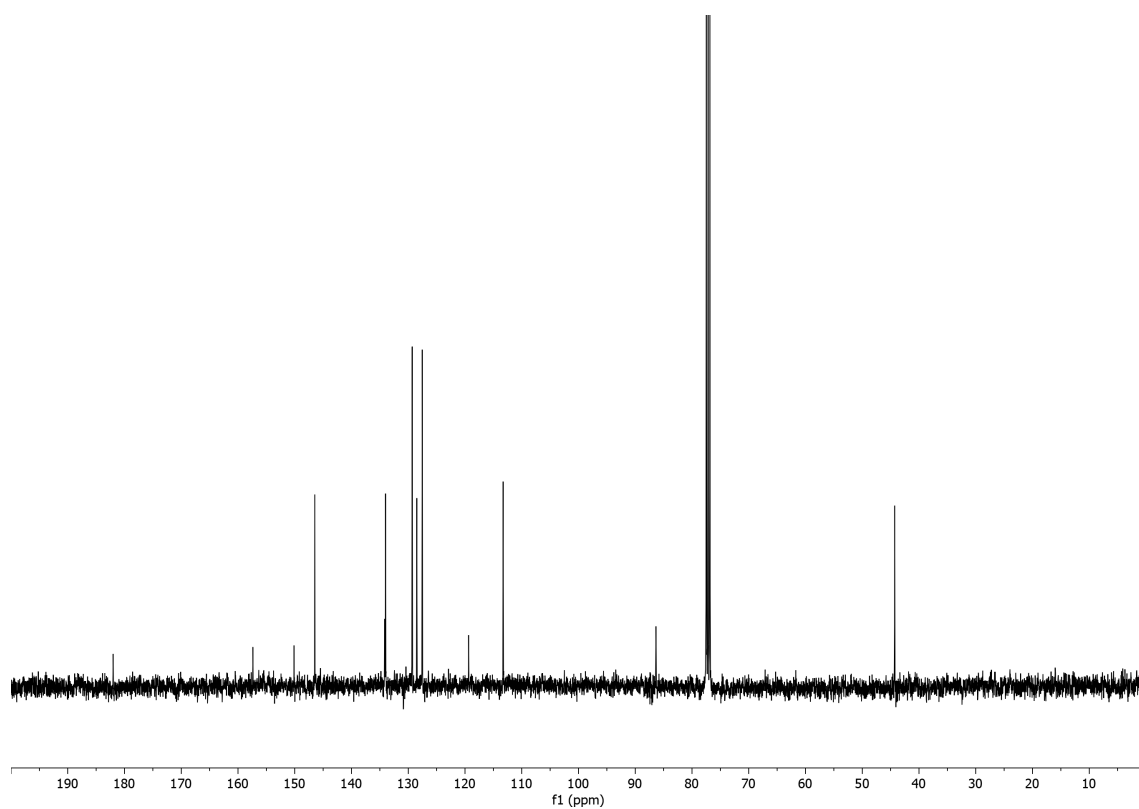

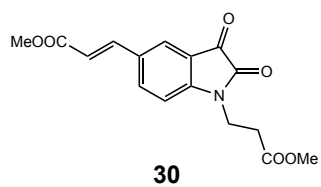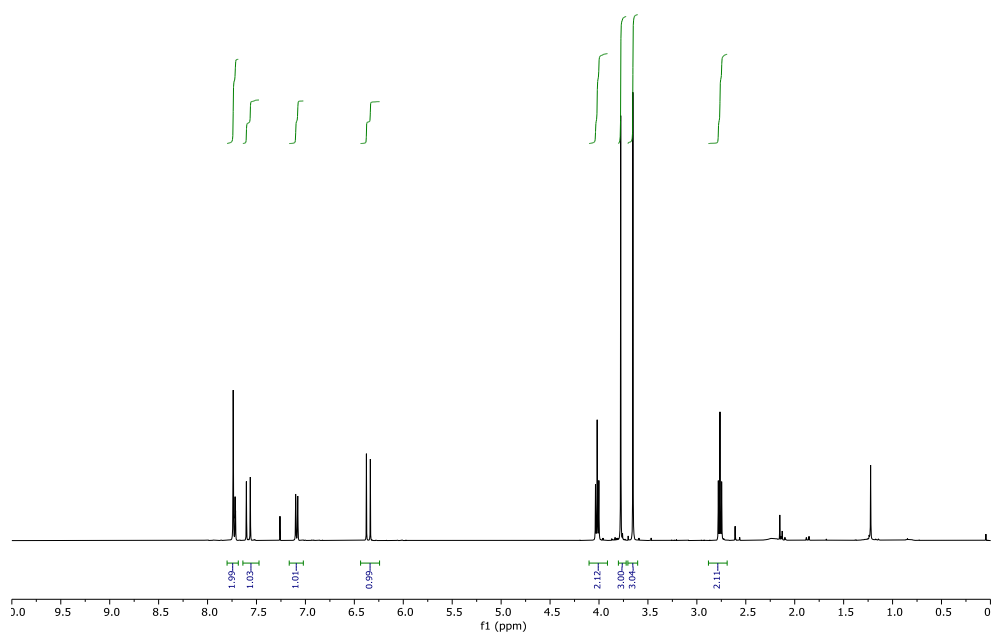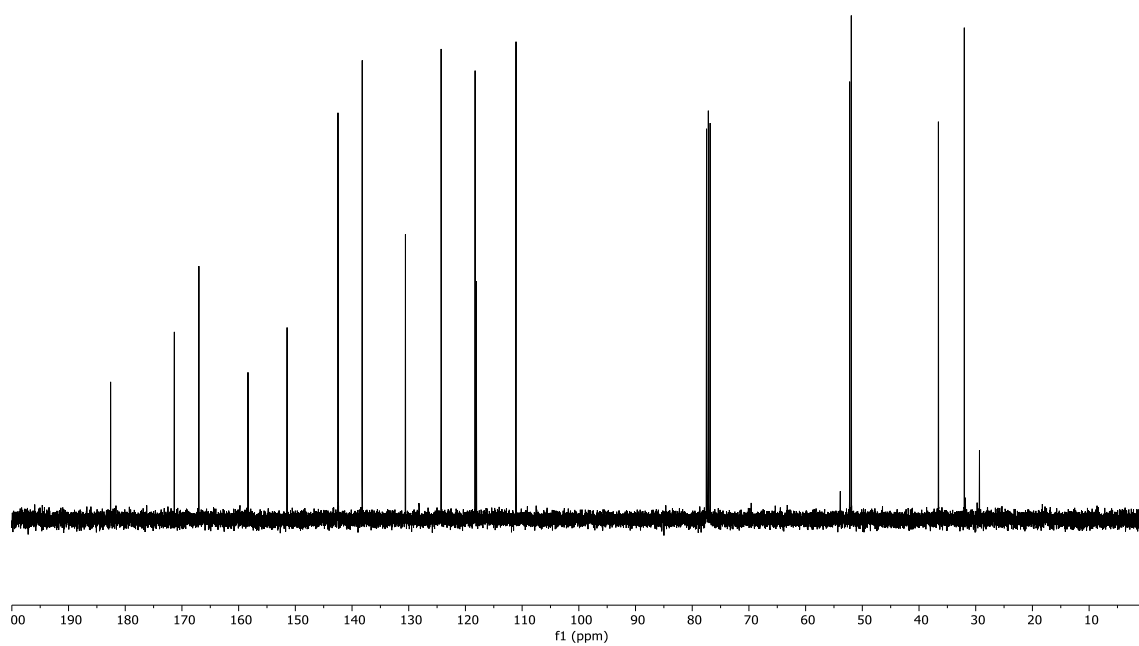

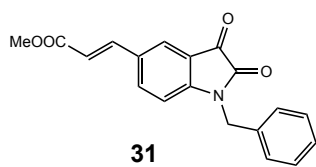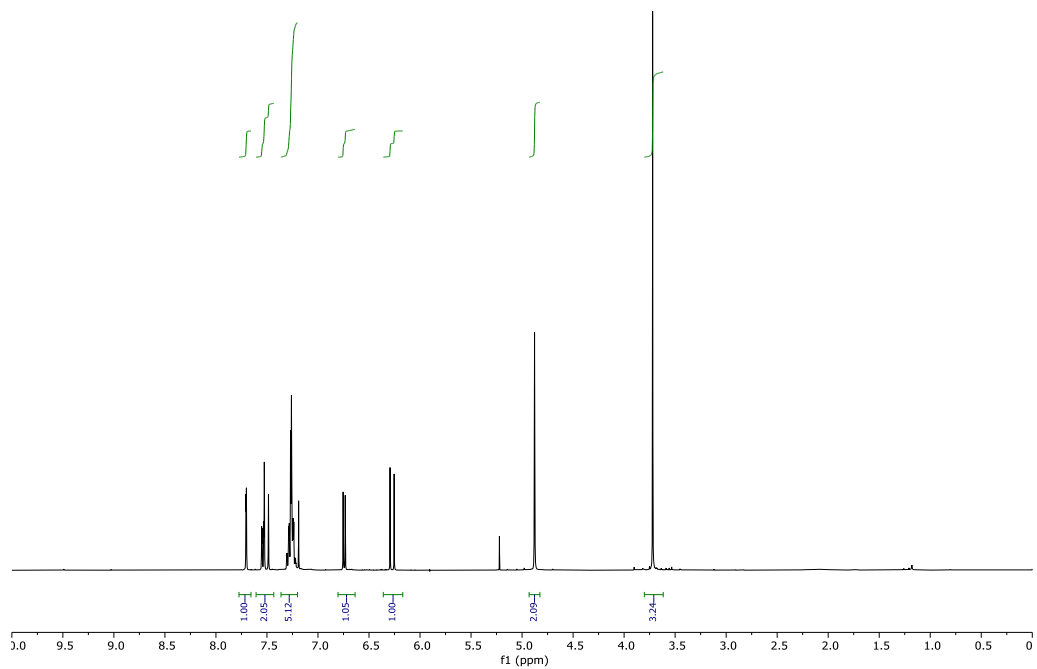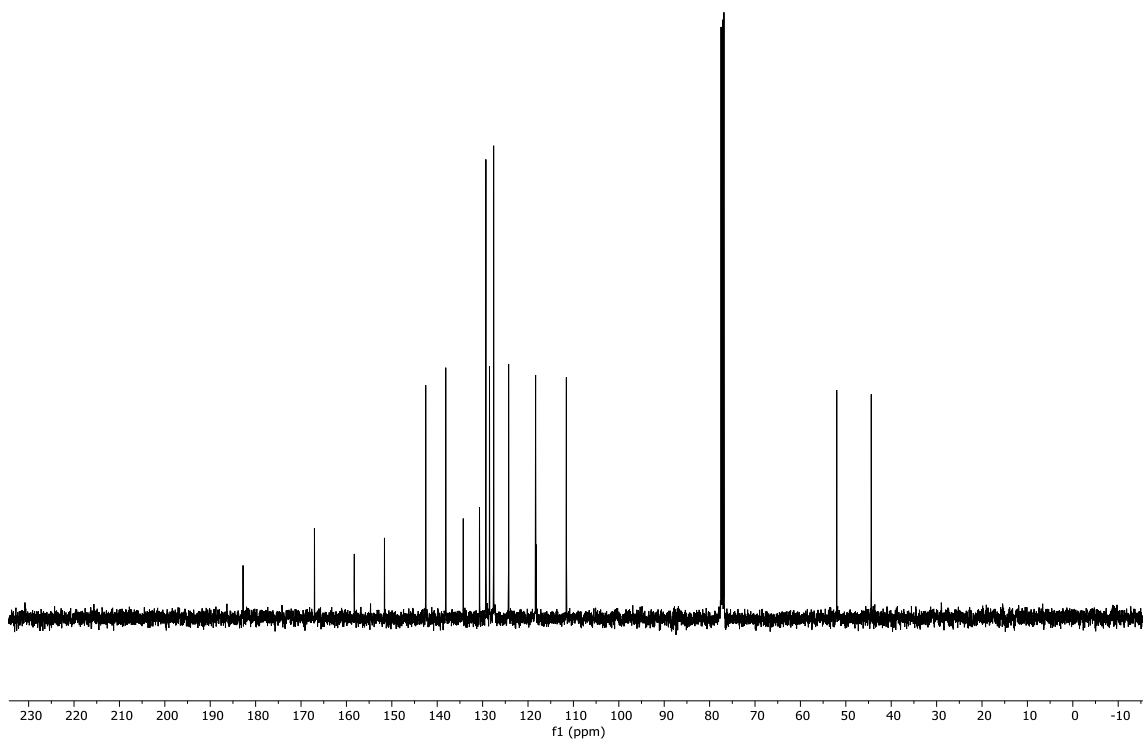

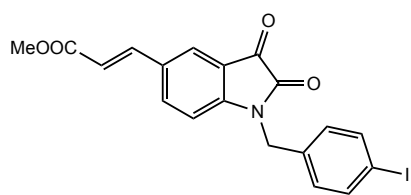

32

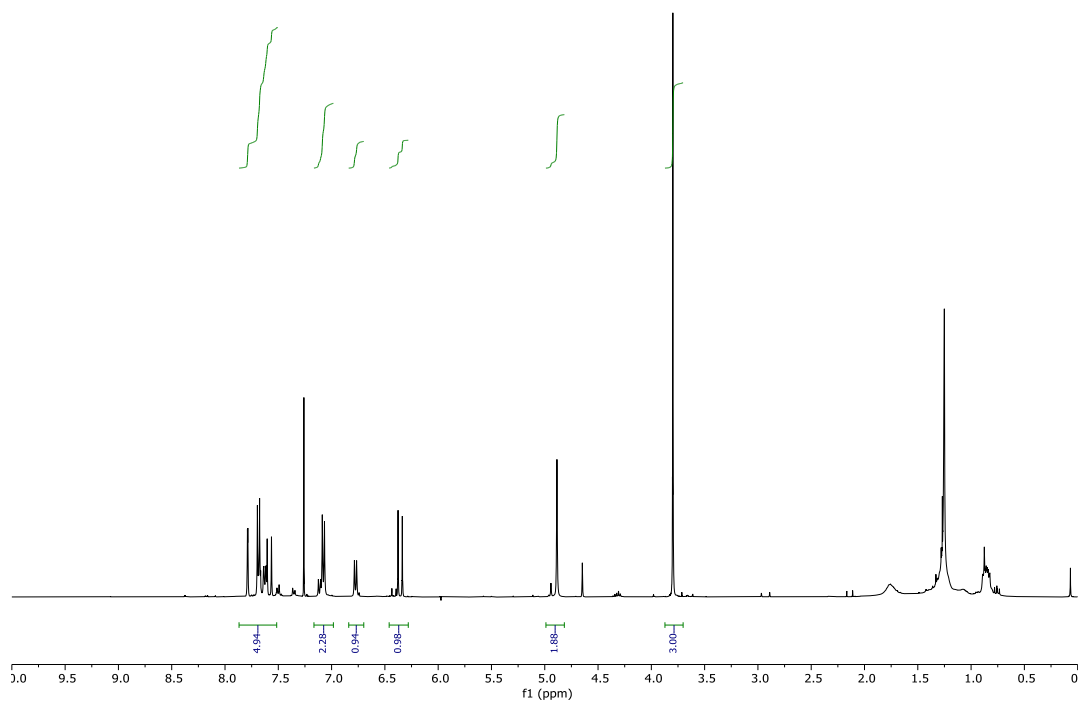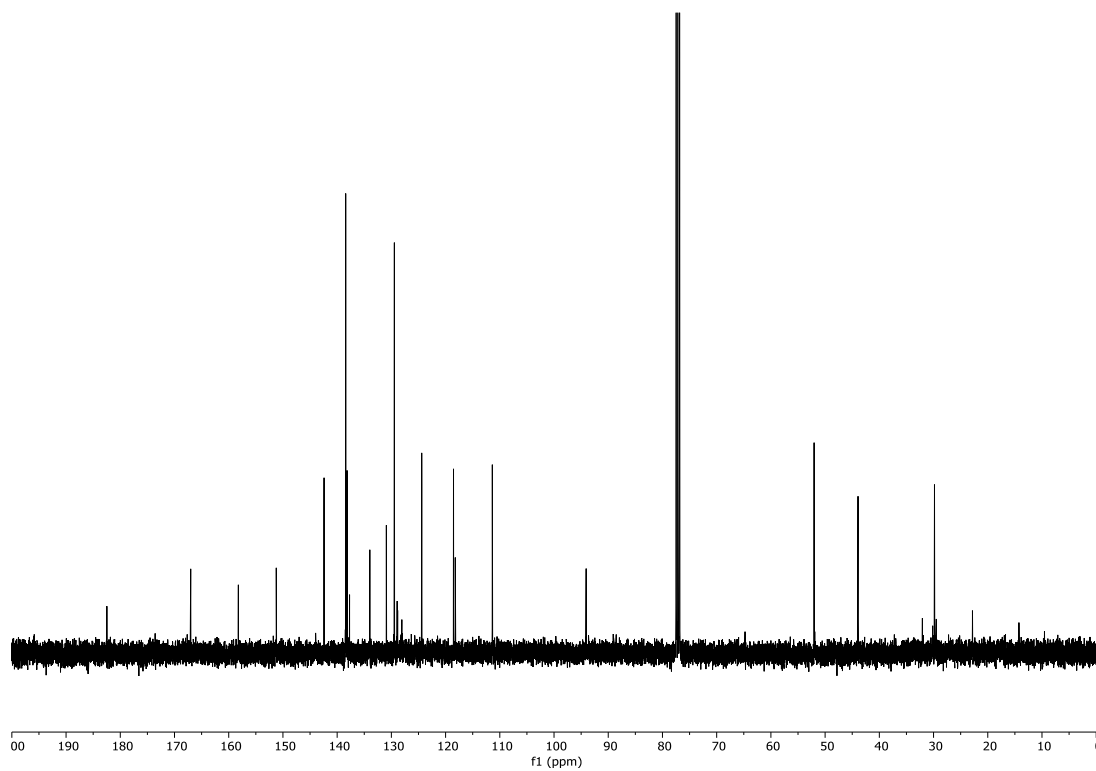

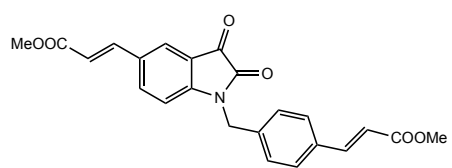

33

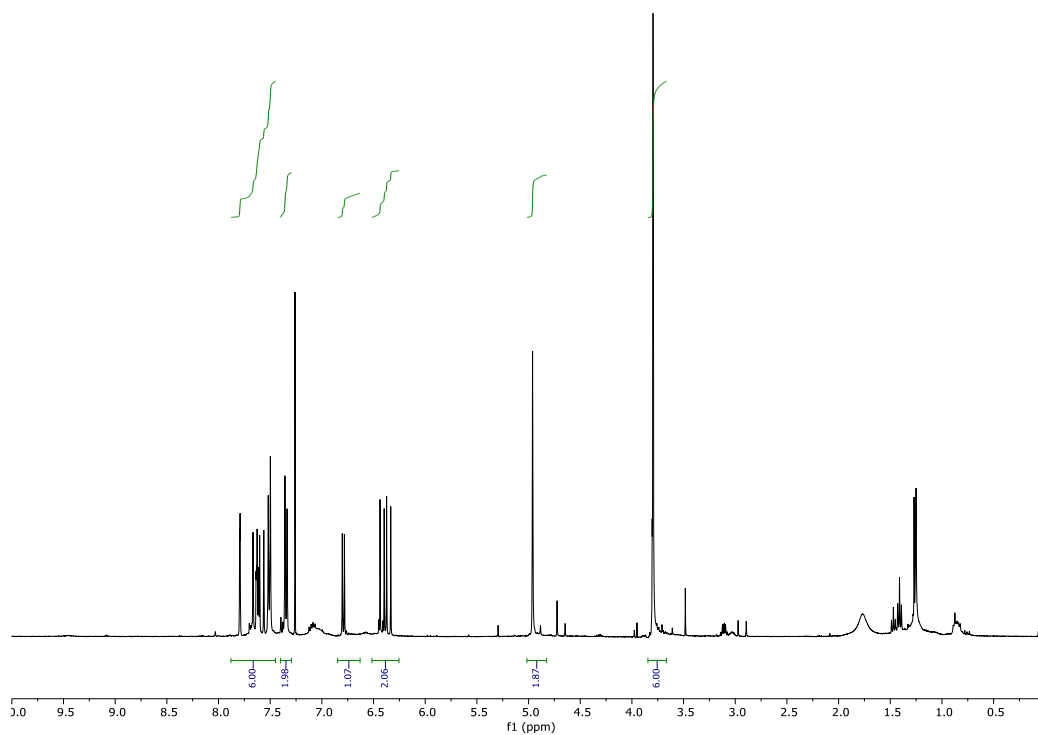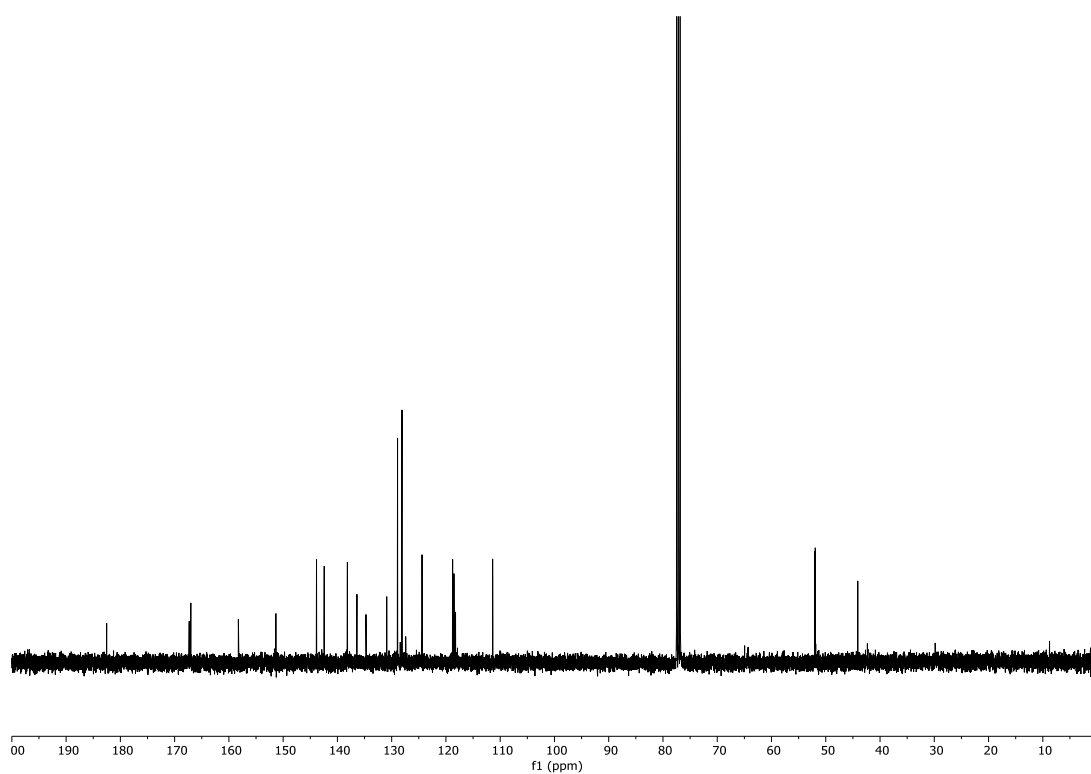

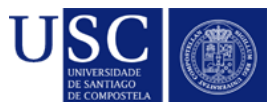

## ESPECTRO ESI-FIA-TOF

### Analysis Info

Sample Name 4 ESI MF3-CM-96 447\_42\_01\_803.d  
Method 803.m **COMPOUND 14**

Acquisition Date 04/06/2022 11:18:52  
Instrument amaZon ETD

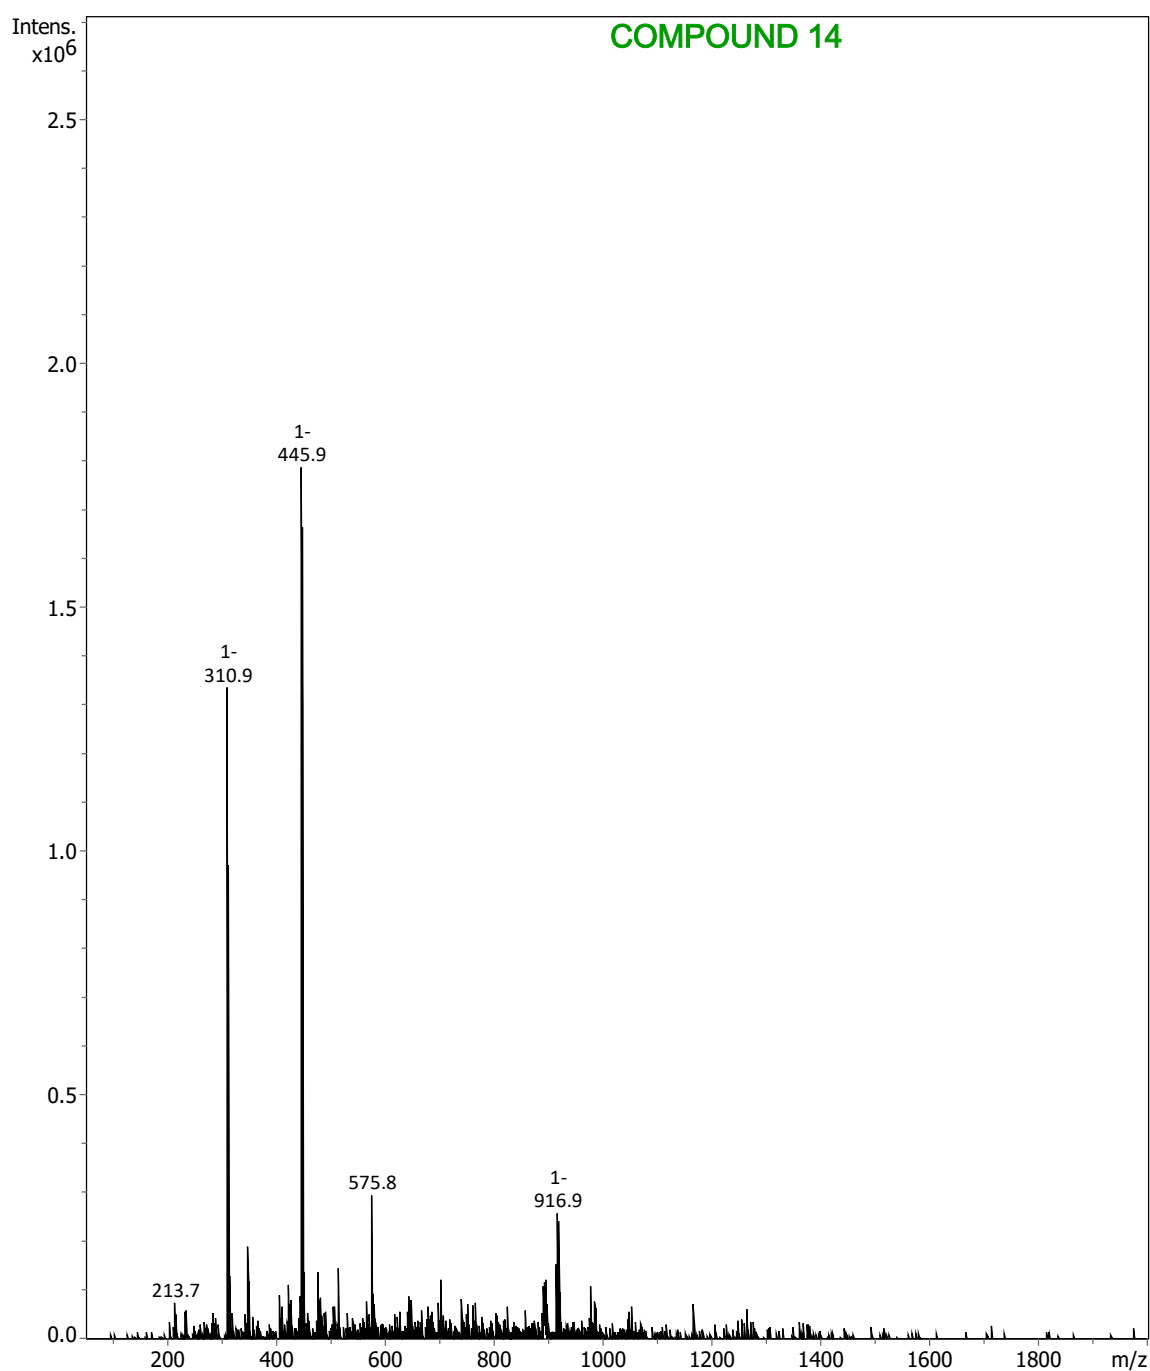

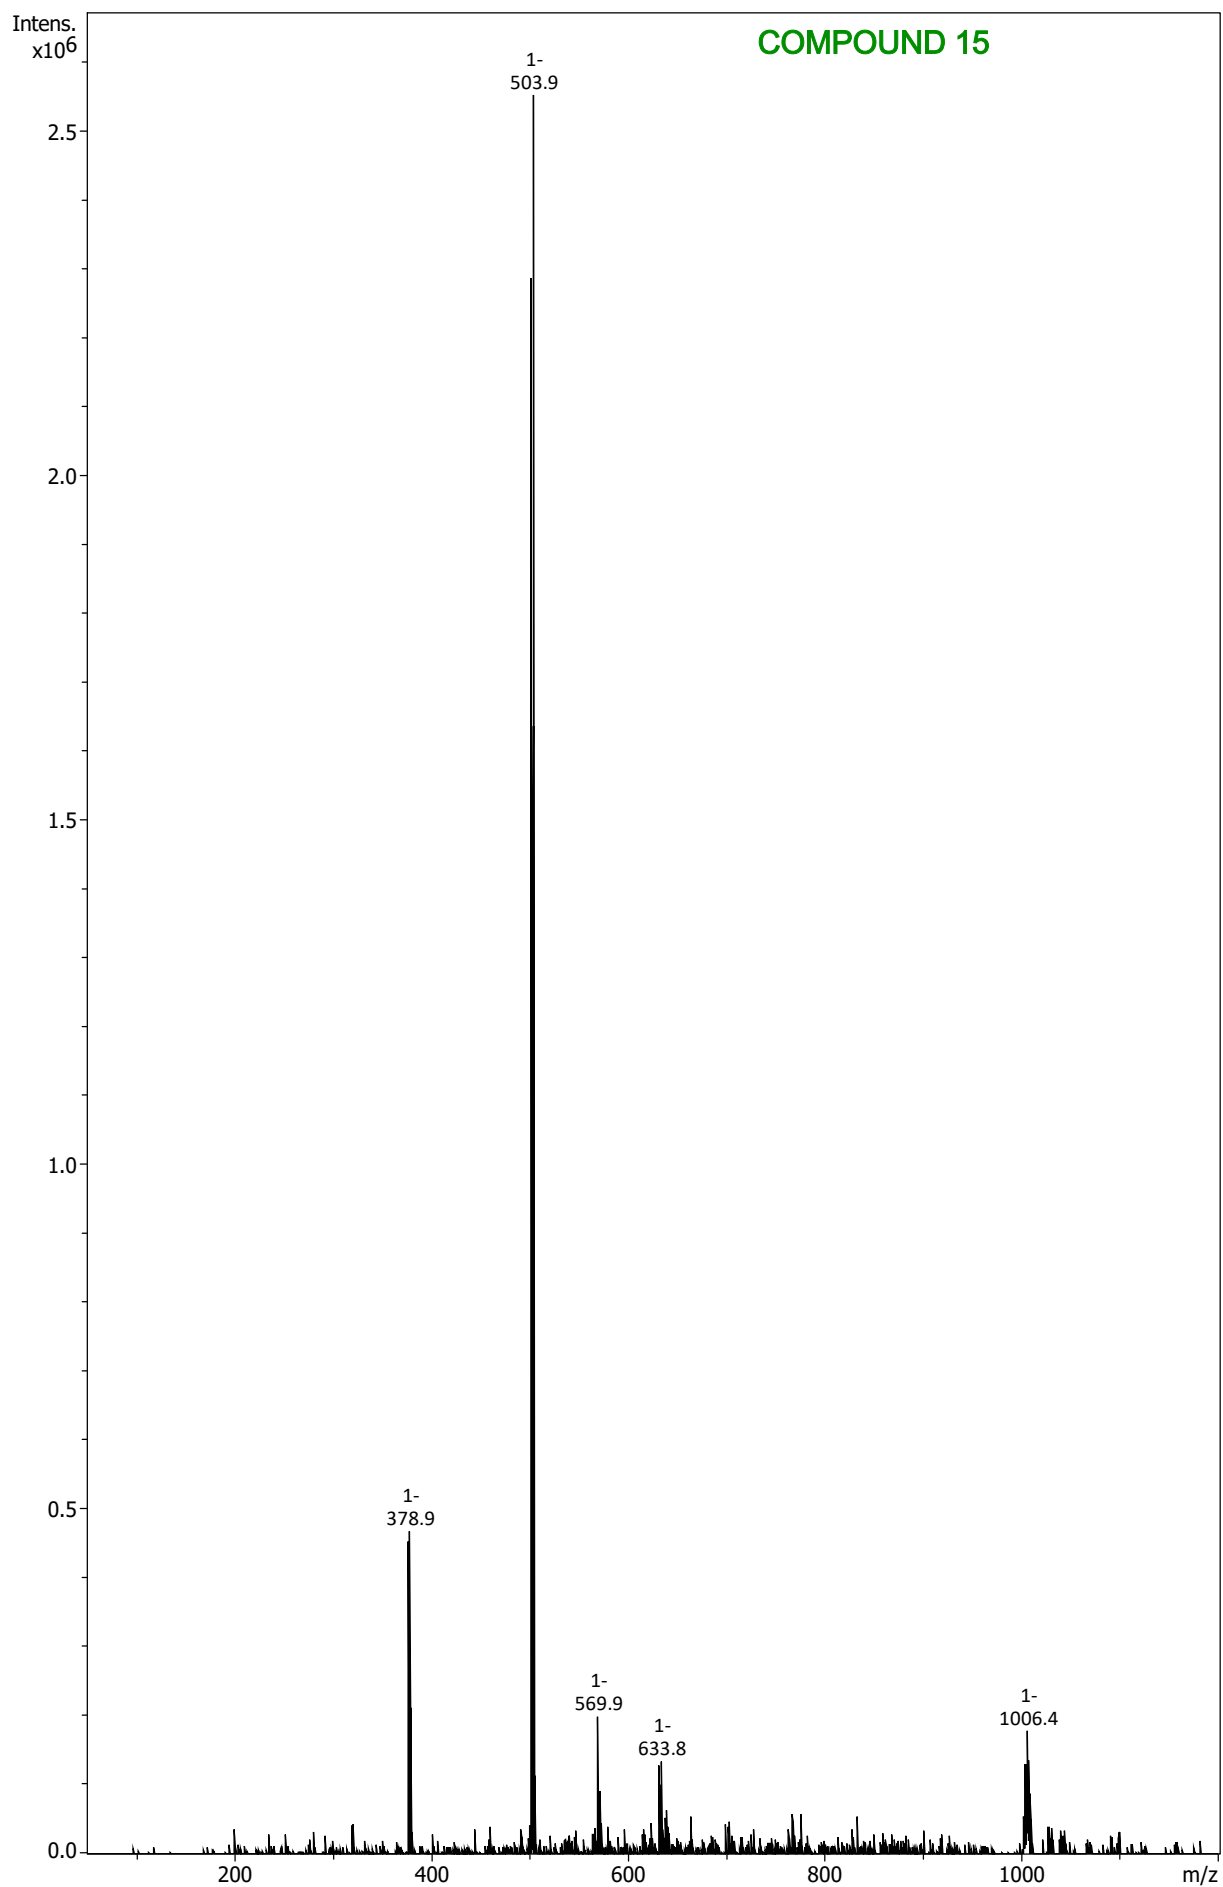

## ESPECTRO ESI-FIA-Ion Trap

### Analysis Info

Sample Name 16 ESI MF-CM-117 457\_51\_01\_824.d  
Method 824.m **COMPOUND 16**

Acquisition Date 04/18/2022 16:36:47  
Instrument amaZon ETD

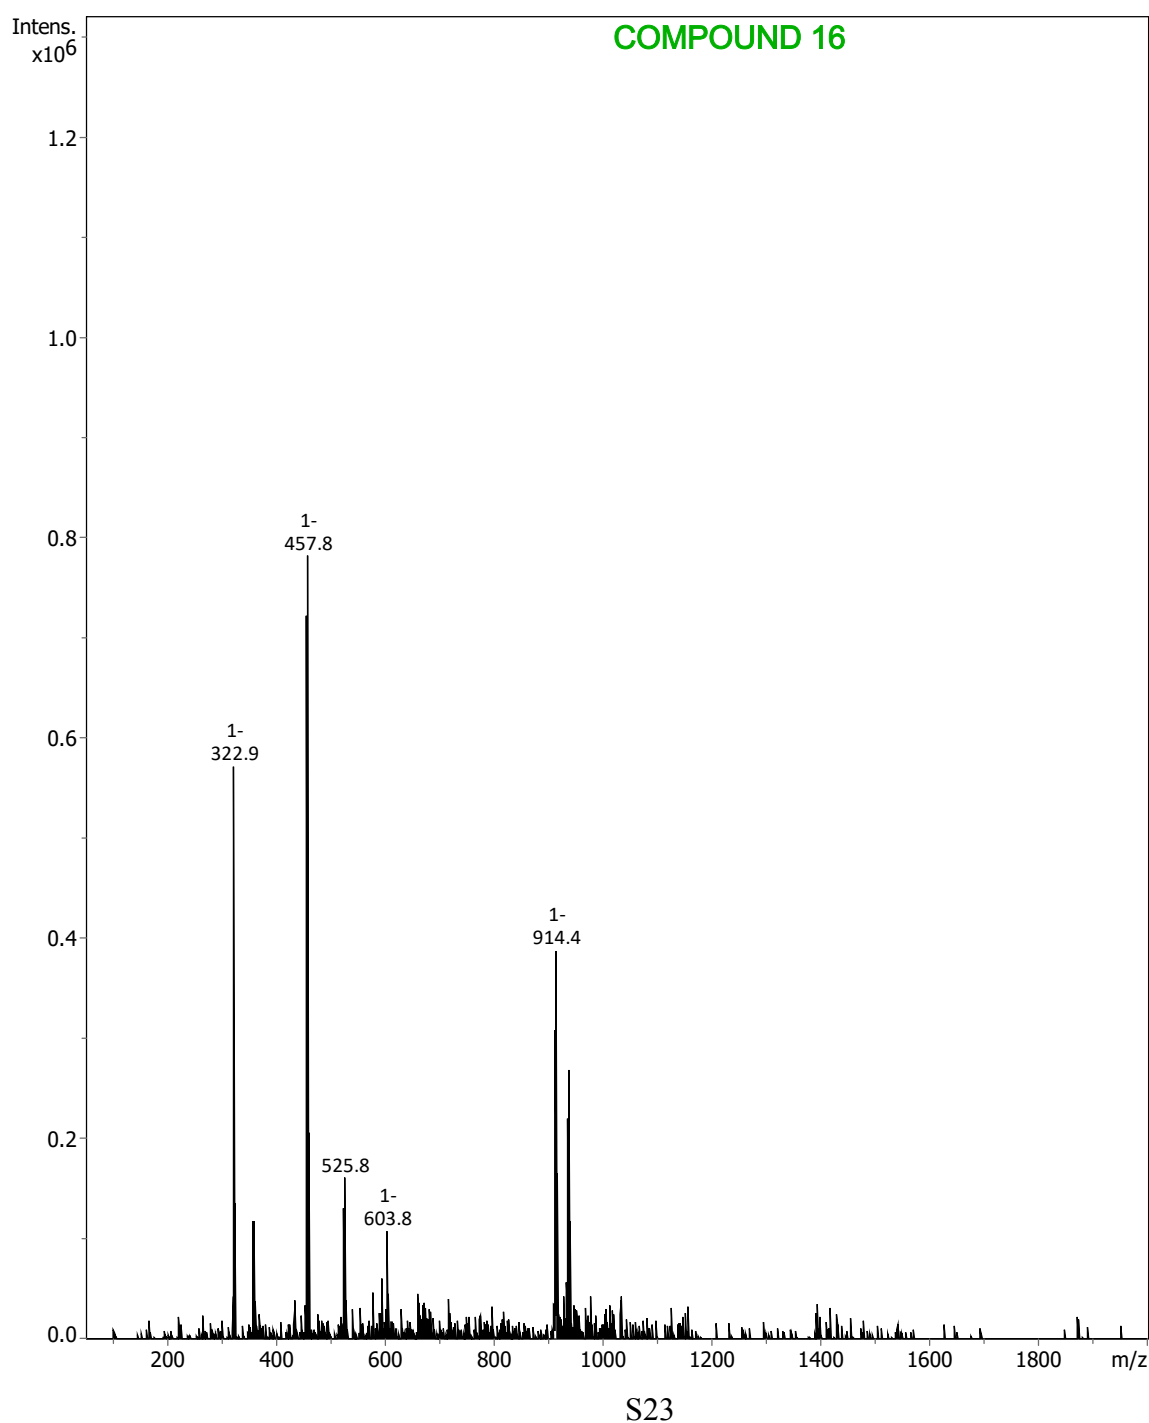



## ESPECTRO ESI-FIA-Ion Trap

### Analysis Info

Sample Name 5 ESI MF3-CM-146 525\_45\_01\_836.d  
Method 836.m **COMPOUND 17**

Acquisition Date 04/22/2022 13:55:33  
Instrument amaZon ETD

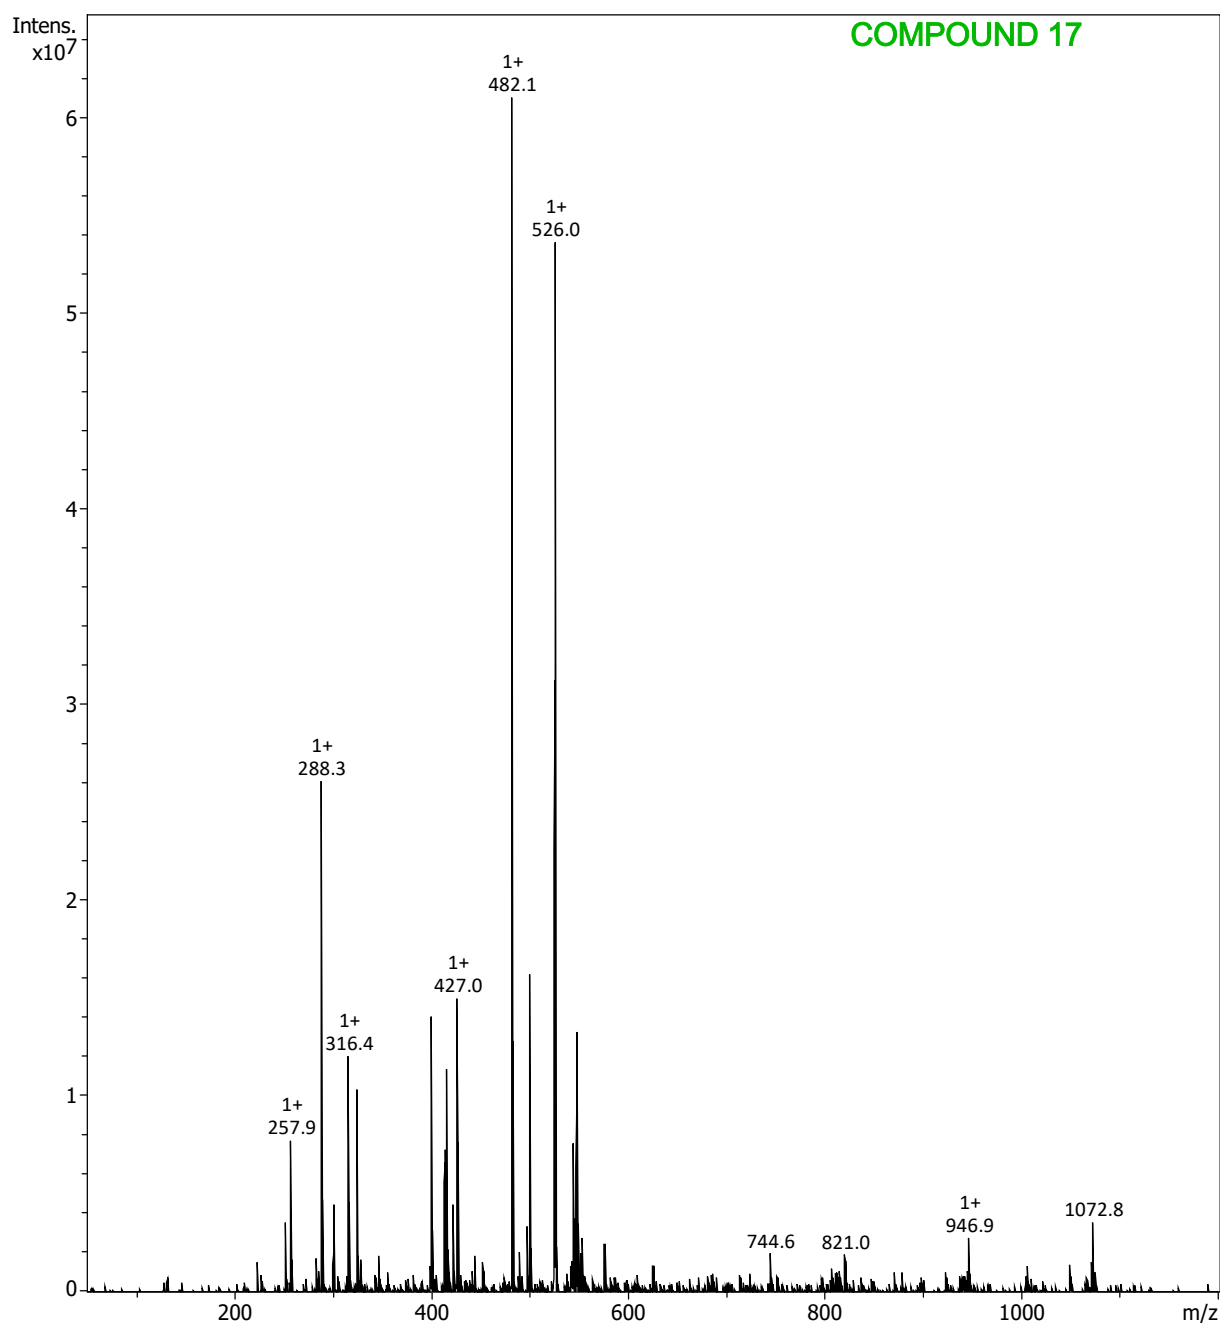

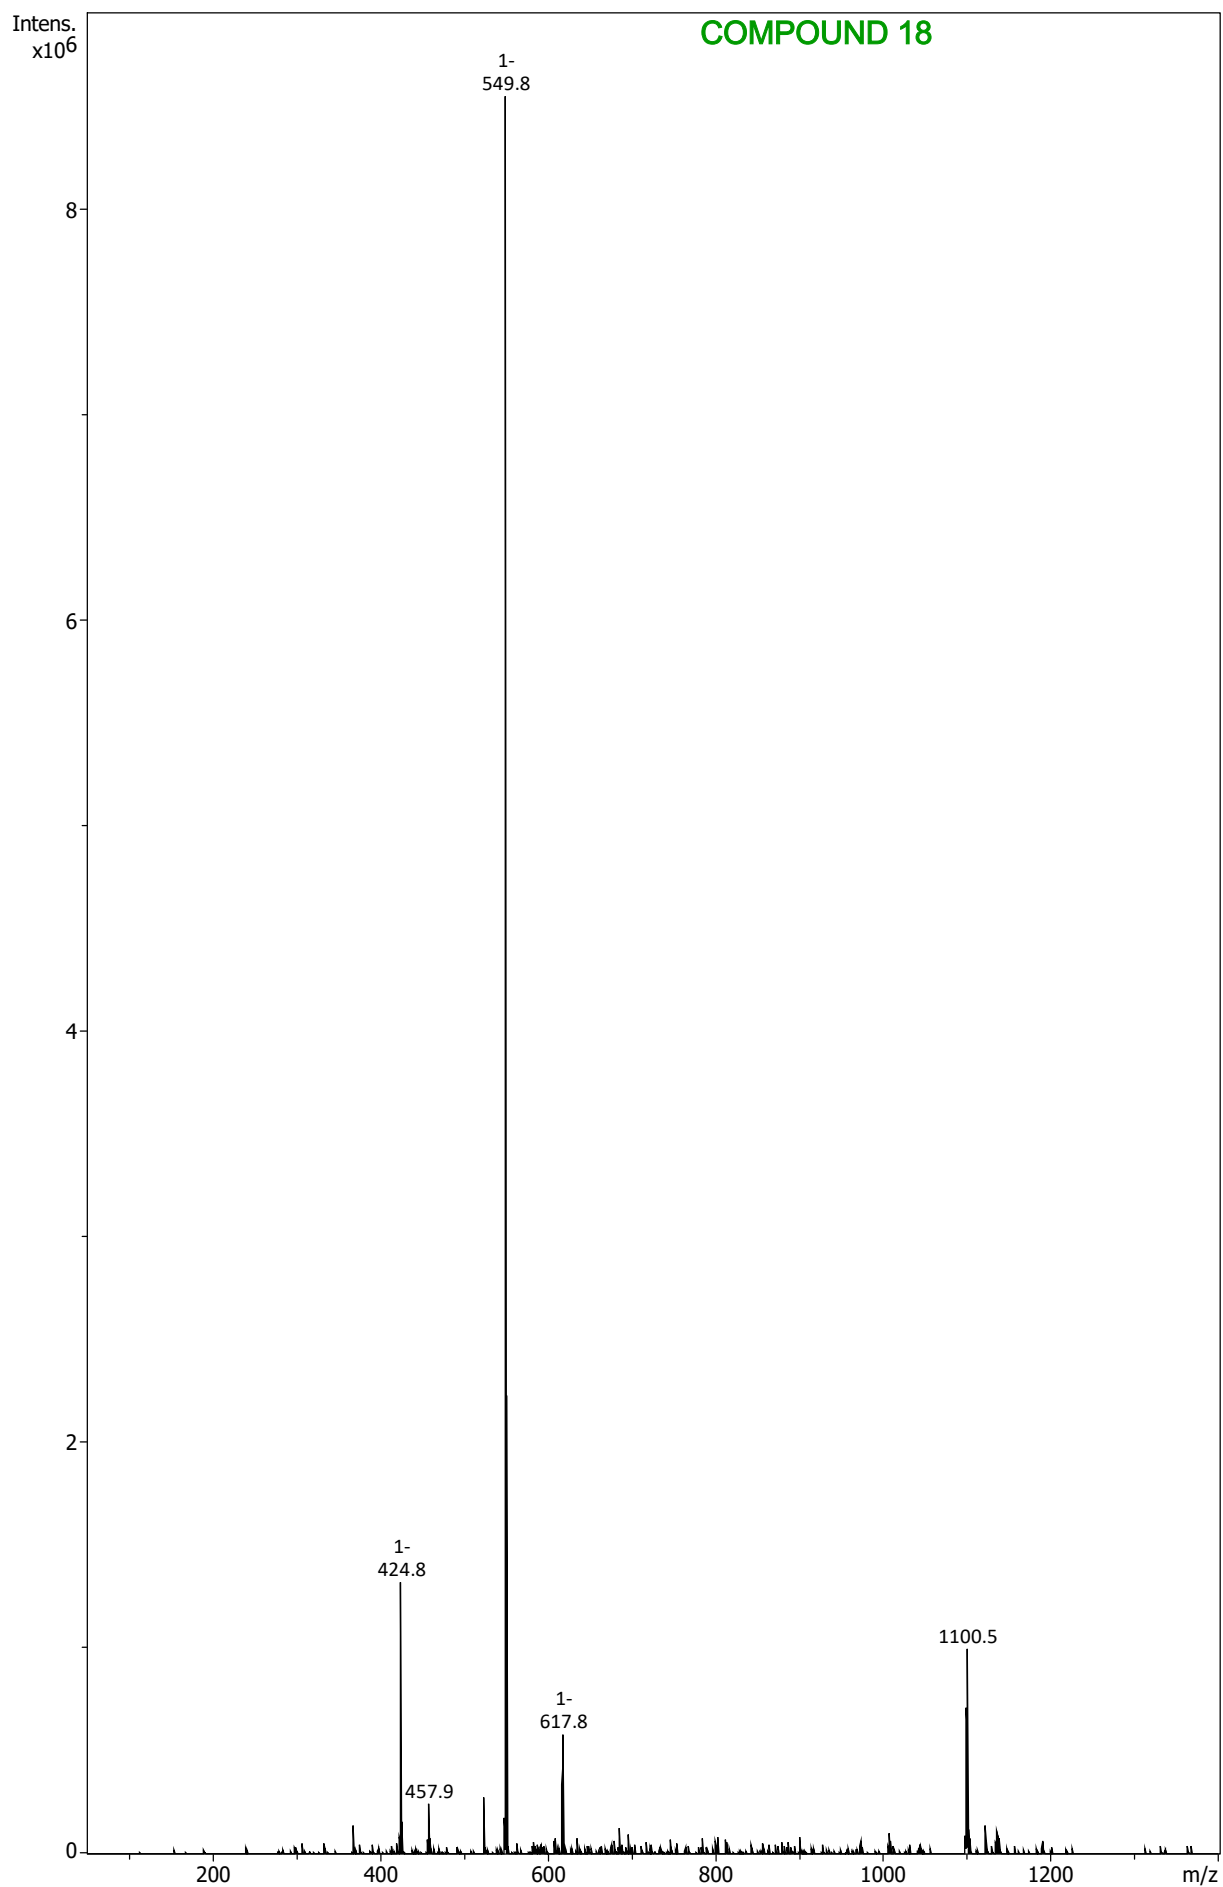

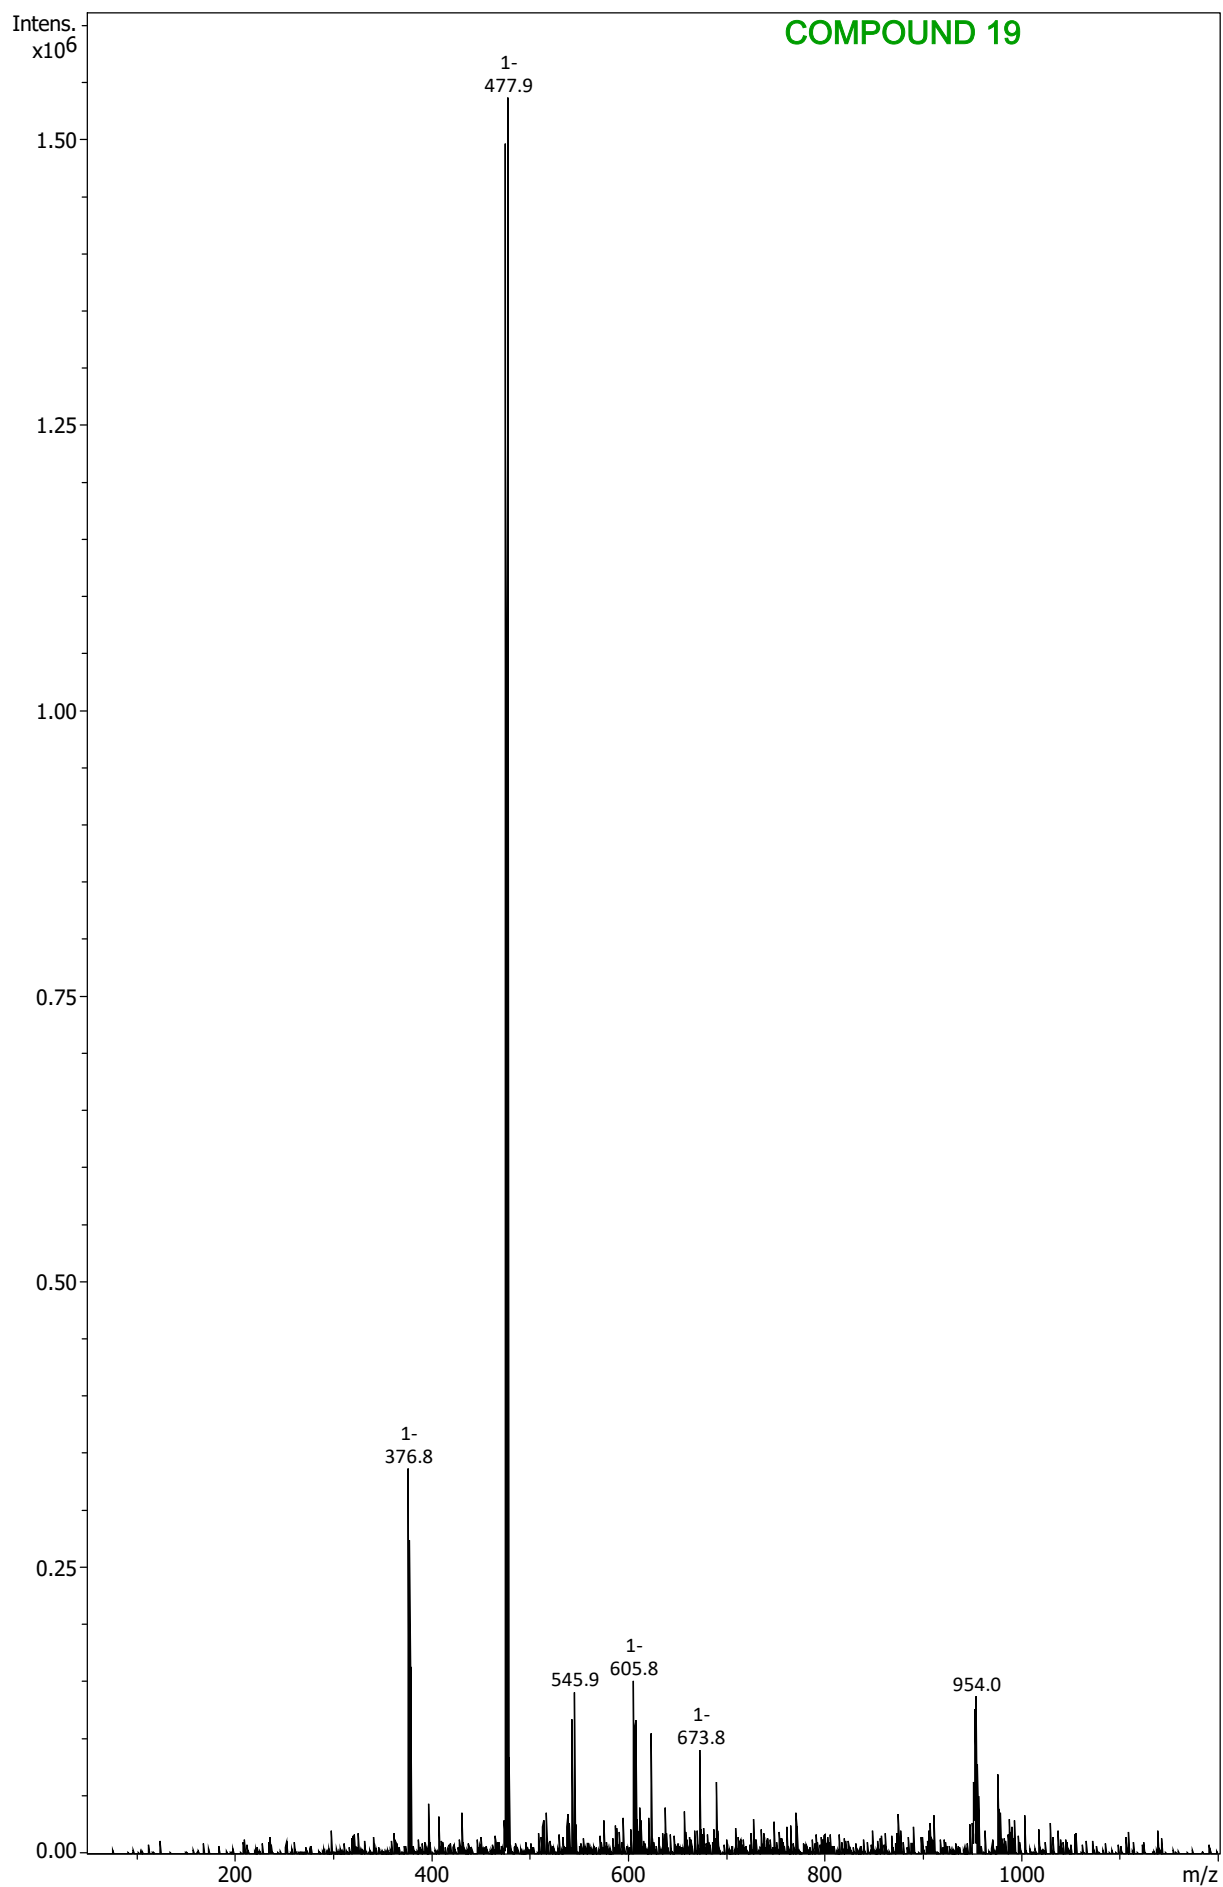

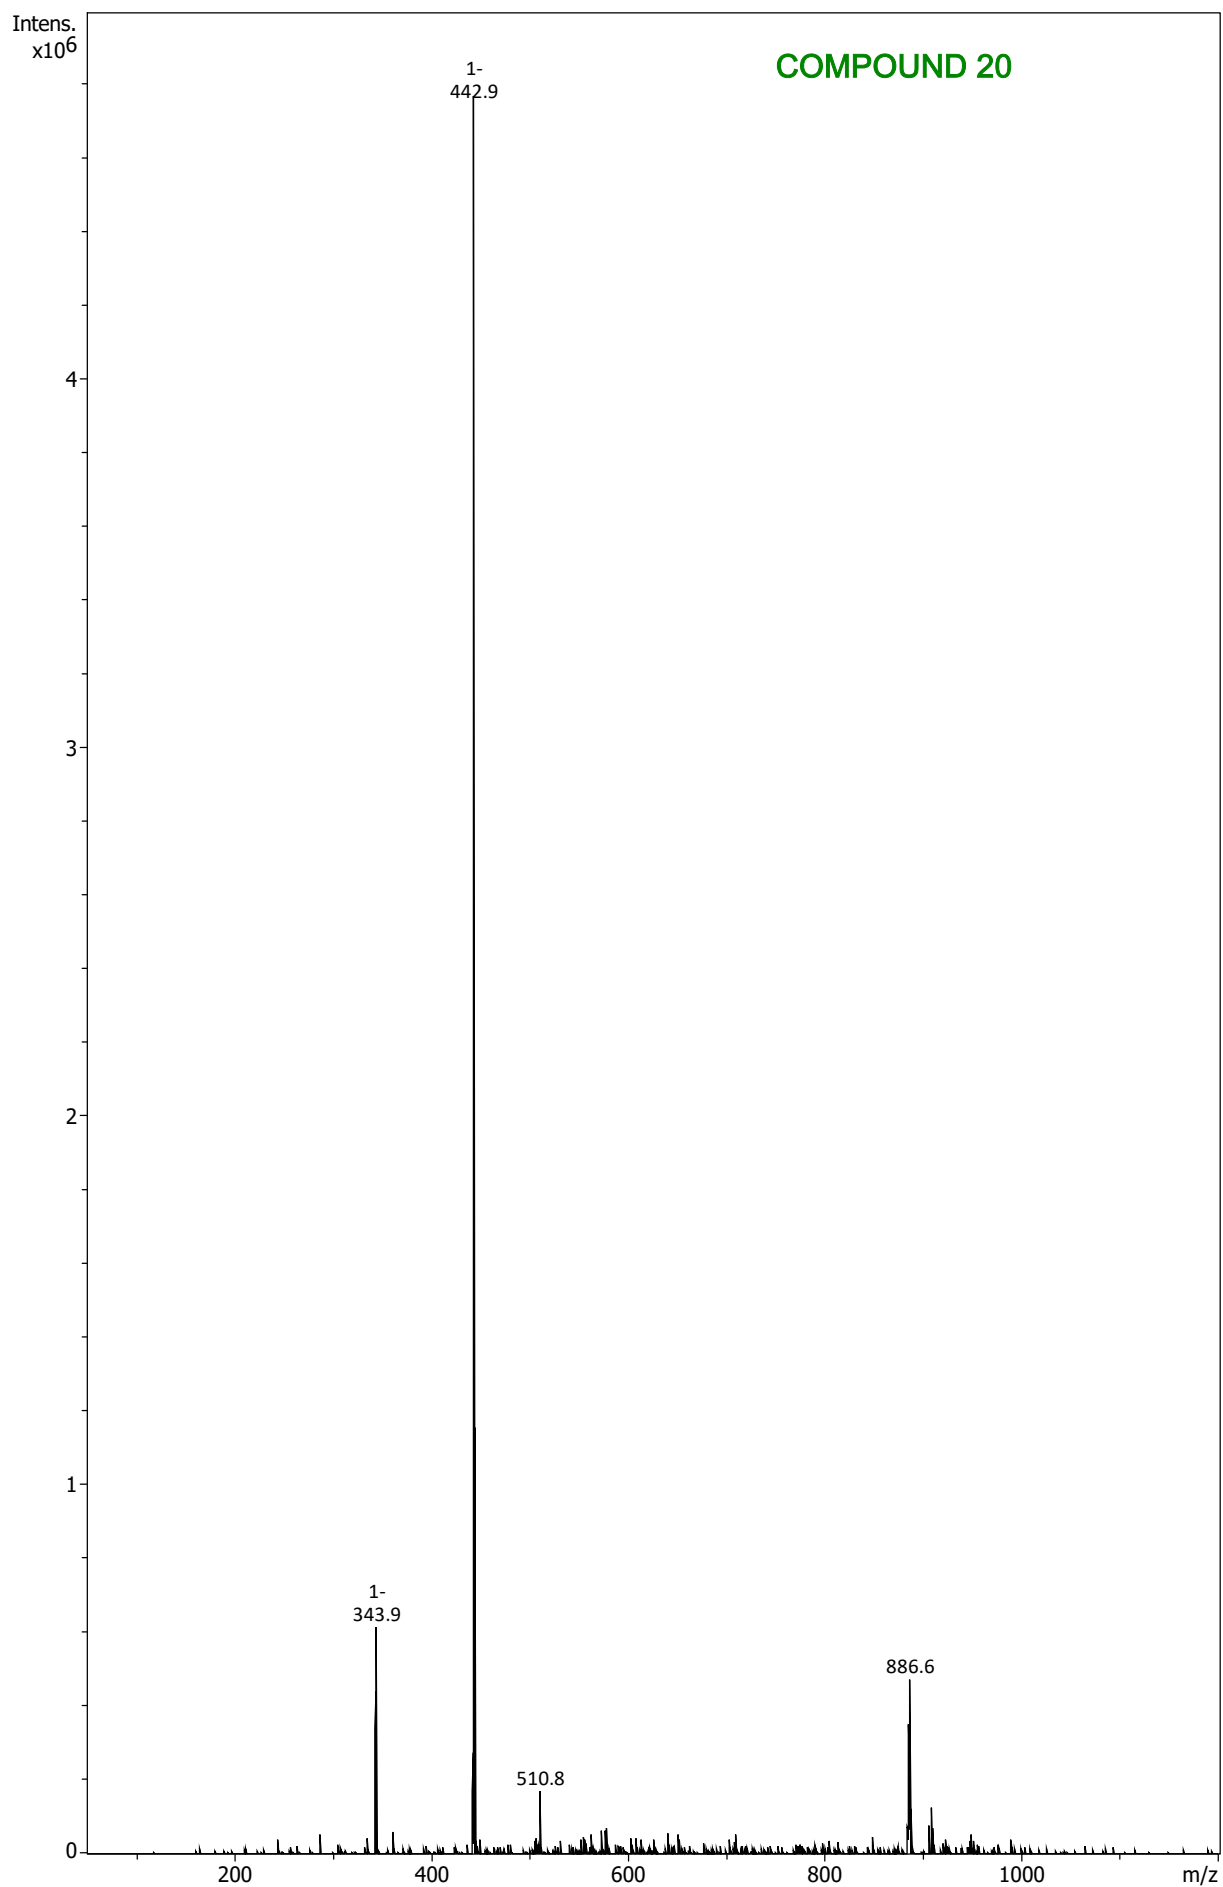

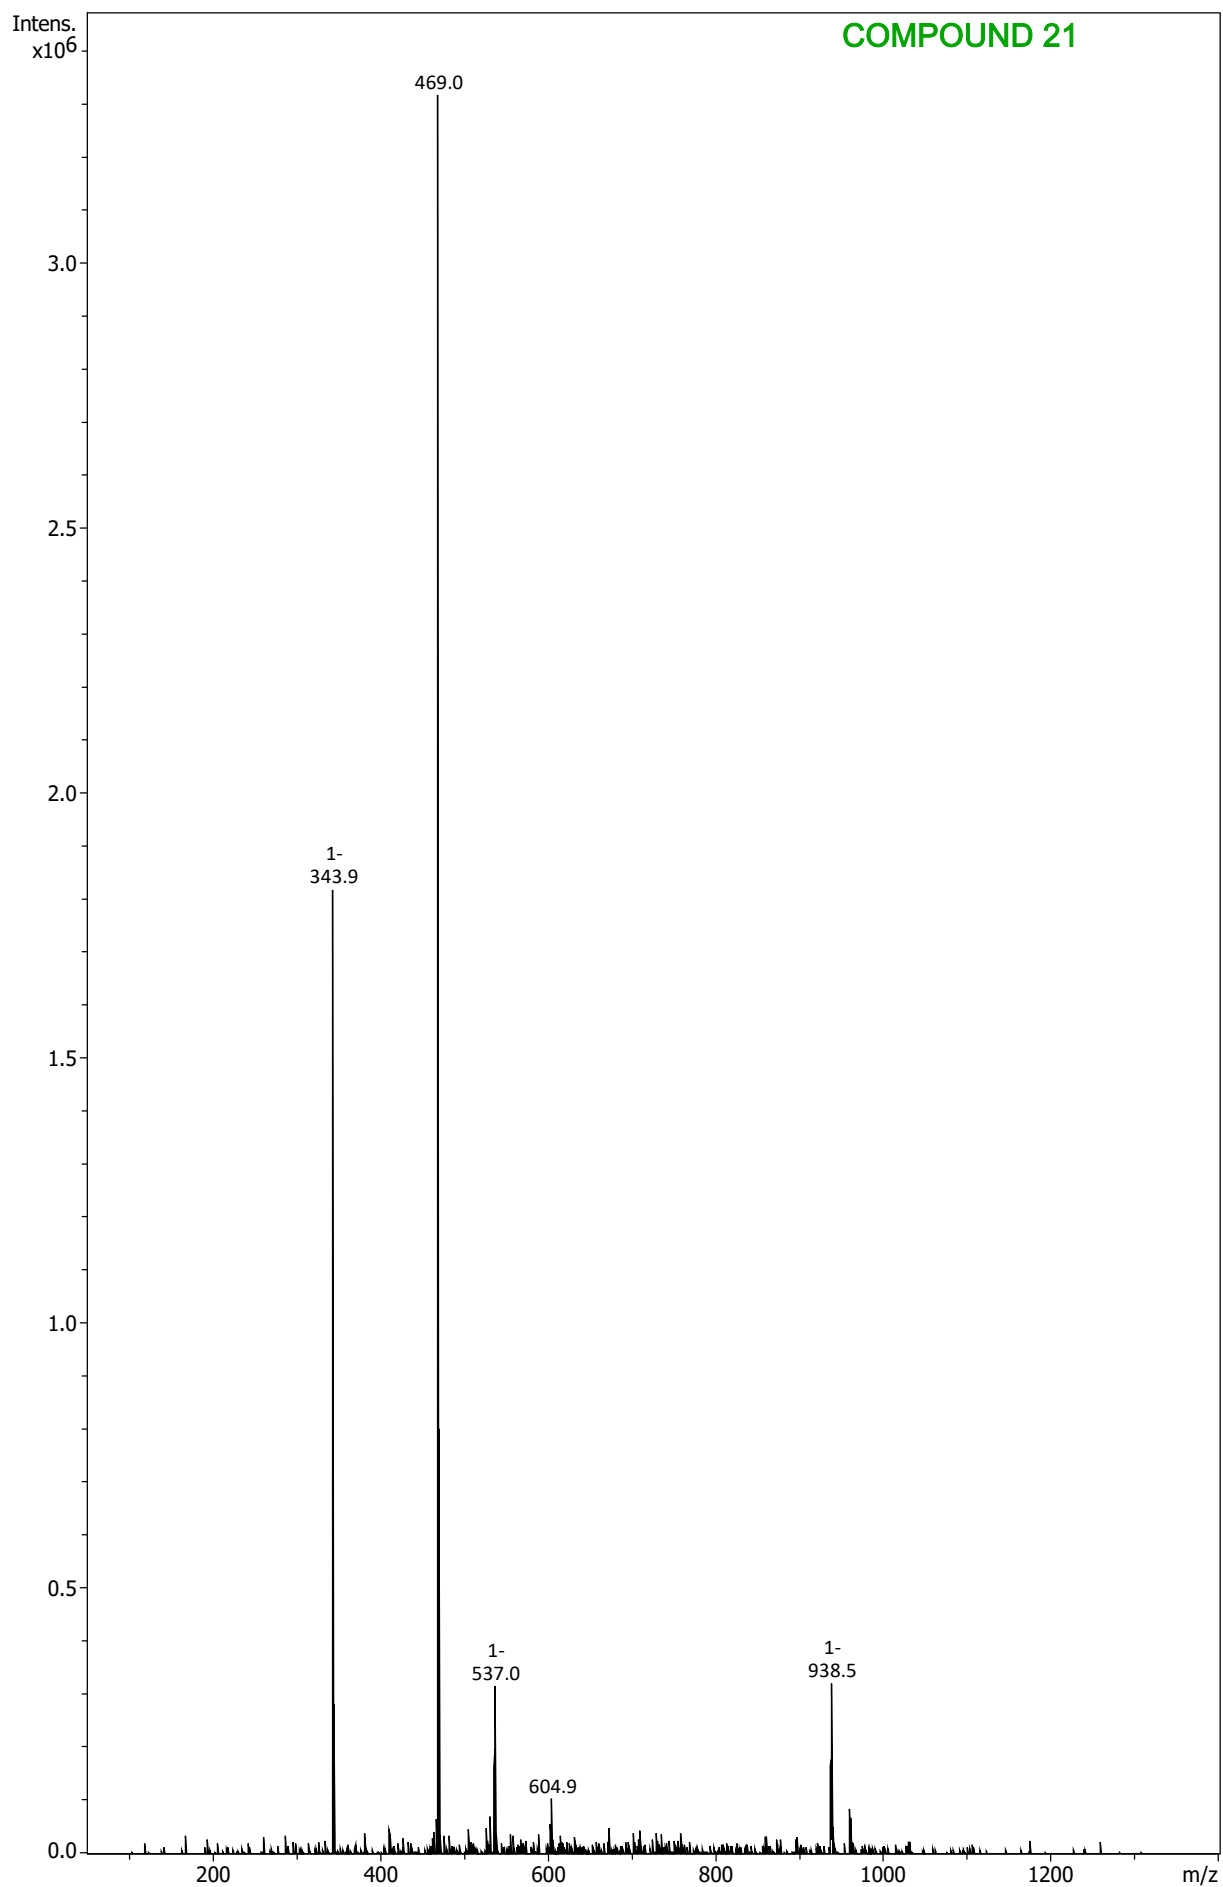

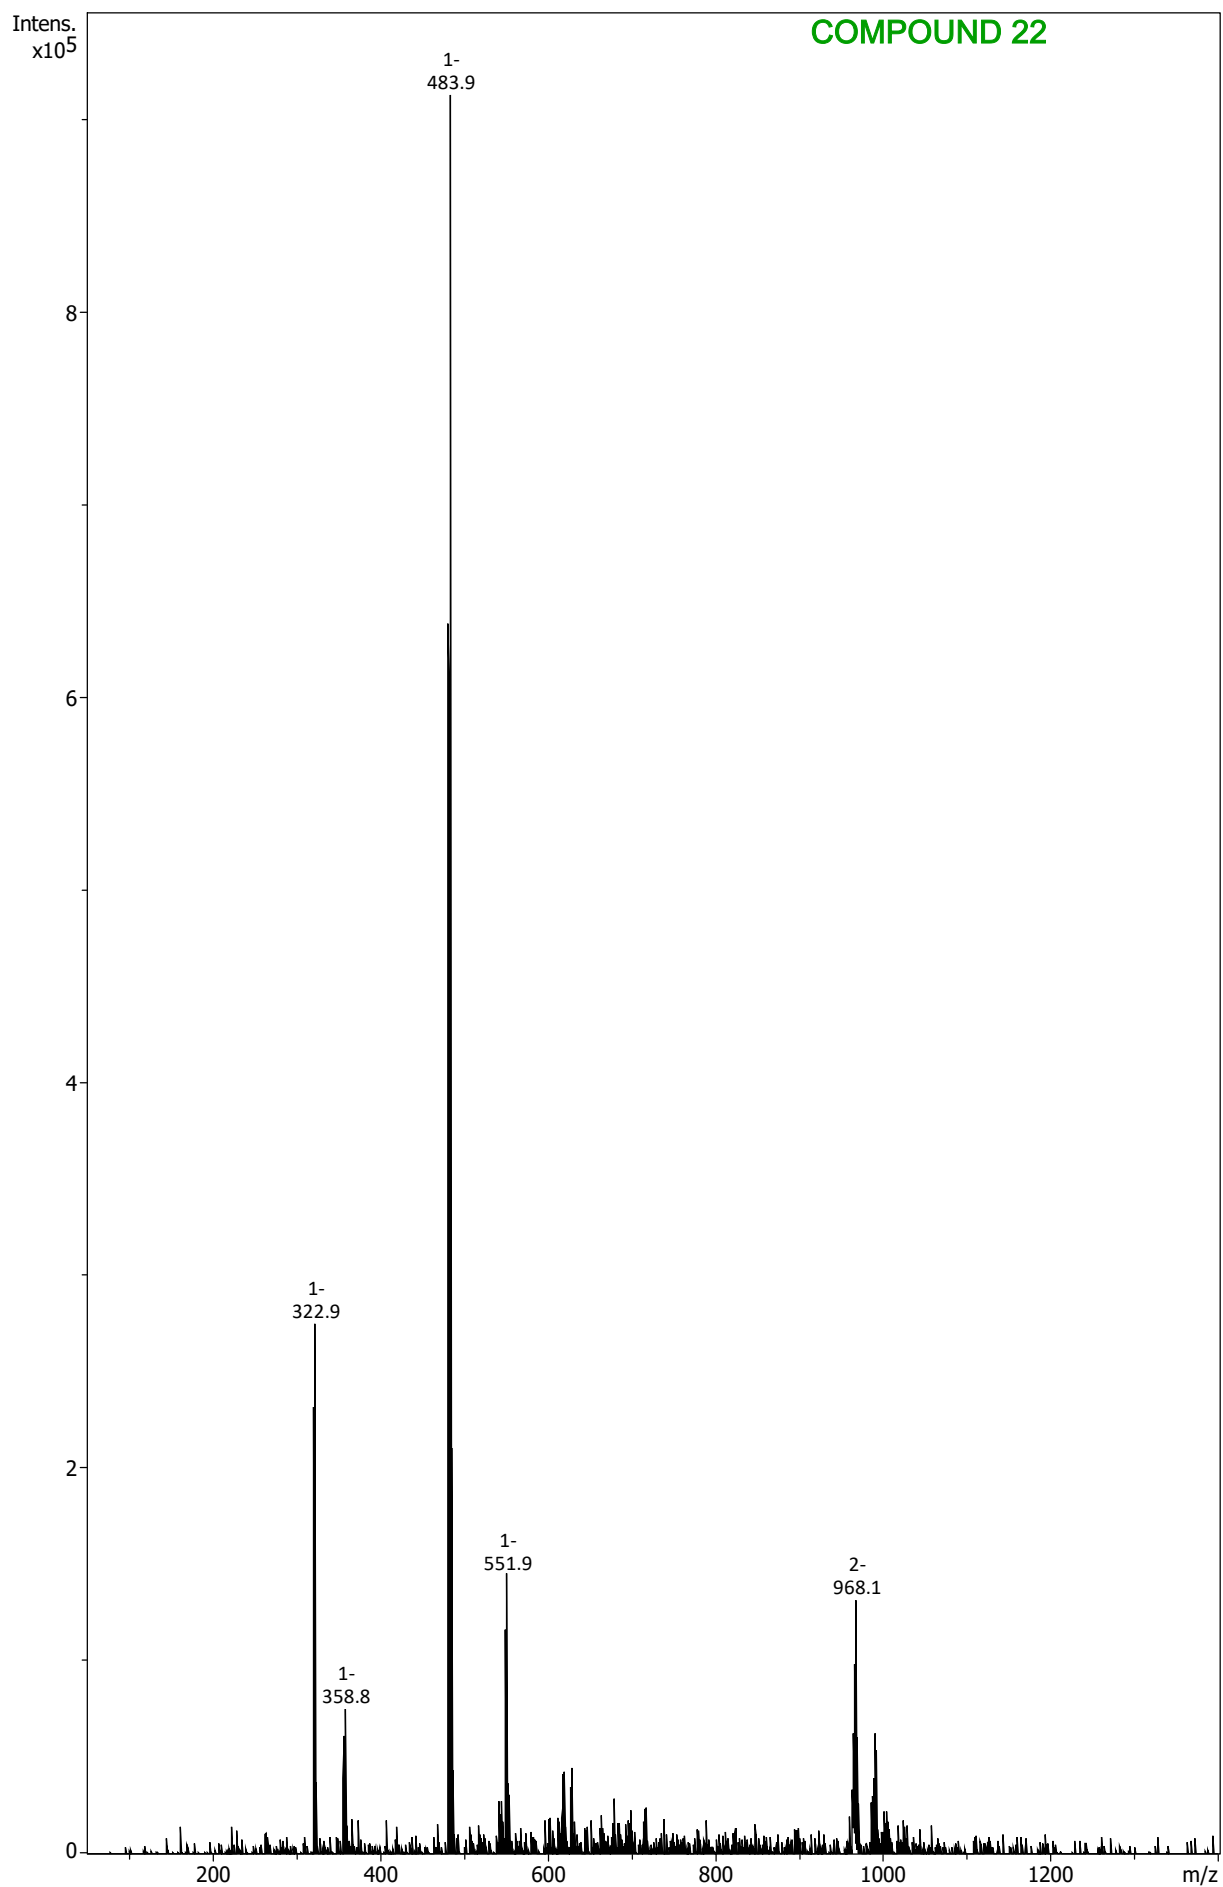

## ESPECTRO ESI-FIA-Ion Trap

### Analysis Info

Sample Name 17 ESI MF3-CM-179 317\_59\_01\_1156.d  
Method 1156.m

Acquisition Date 12/1/2022 4:00:32 PM  
Instrument amaZon ETD

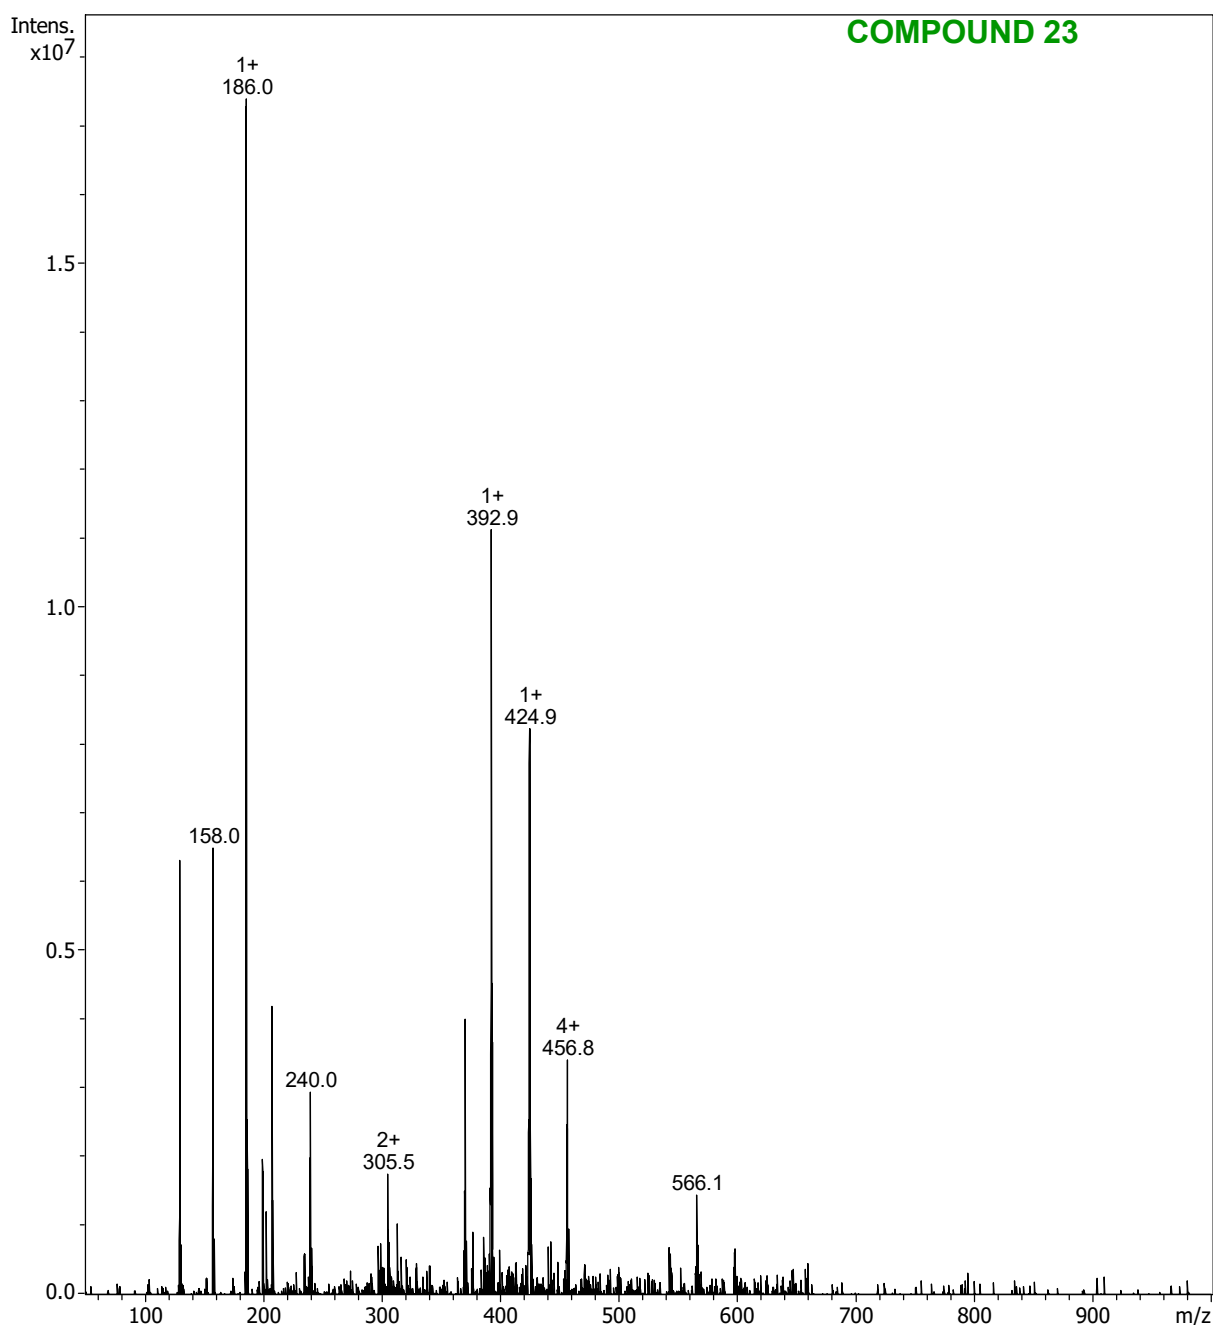

## ESPECTRO ESI-FIA-Ion Trap

### Analysis Info

Sample Name 9 ESI MF3-CM-181 310\_52\_01\_1148.d  
Method 1148.m

Acquisition Date 12/1/2022 2:31:54 PM  
Instrument amaZon ETD

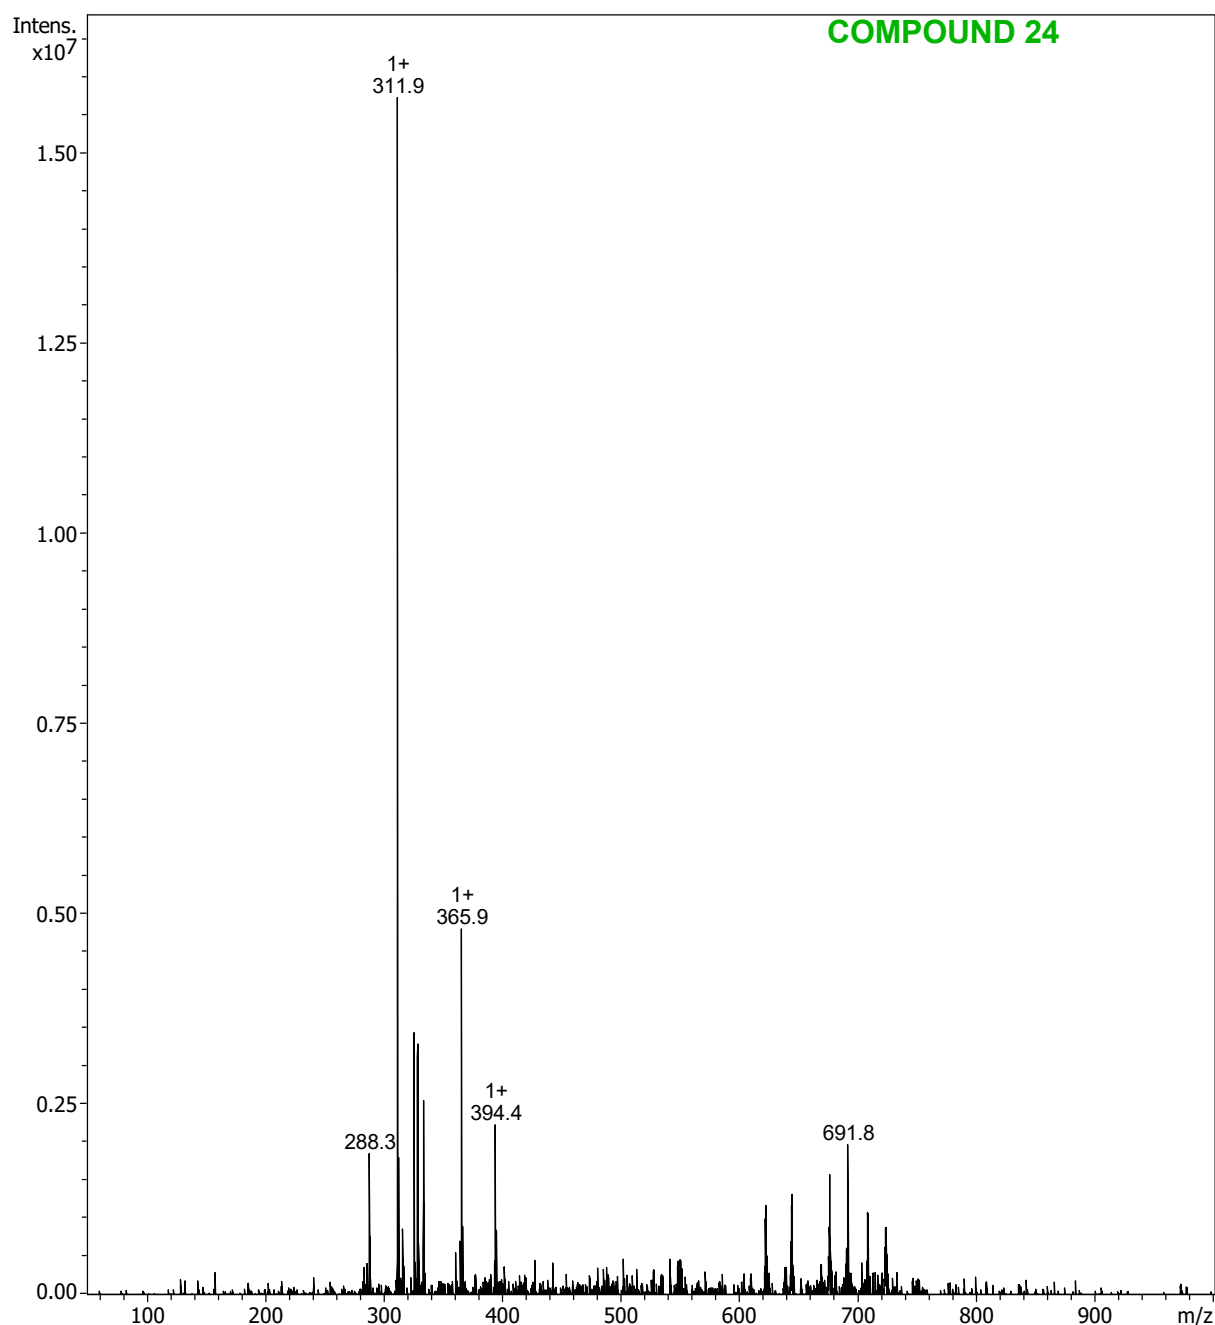



## ESPECTRO ESI-FIA-Ion Trap

### Analysis Info

Sample Name 15 ESI MF3-CM-193 318\_57\_01\_1154.d  
Method 1154.m

Acquisition Date 12/1/2022 3:38:22 PM  
Instrument amaZon ETD

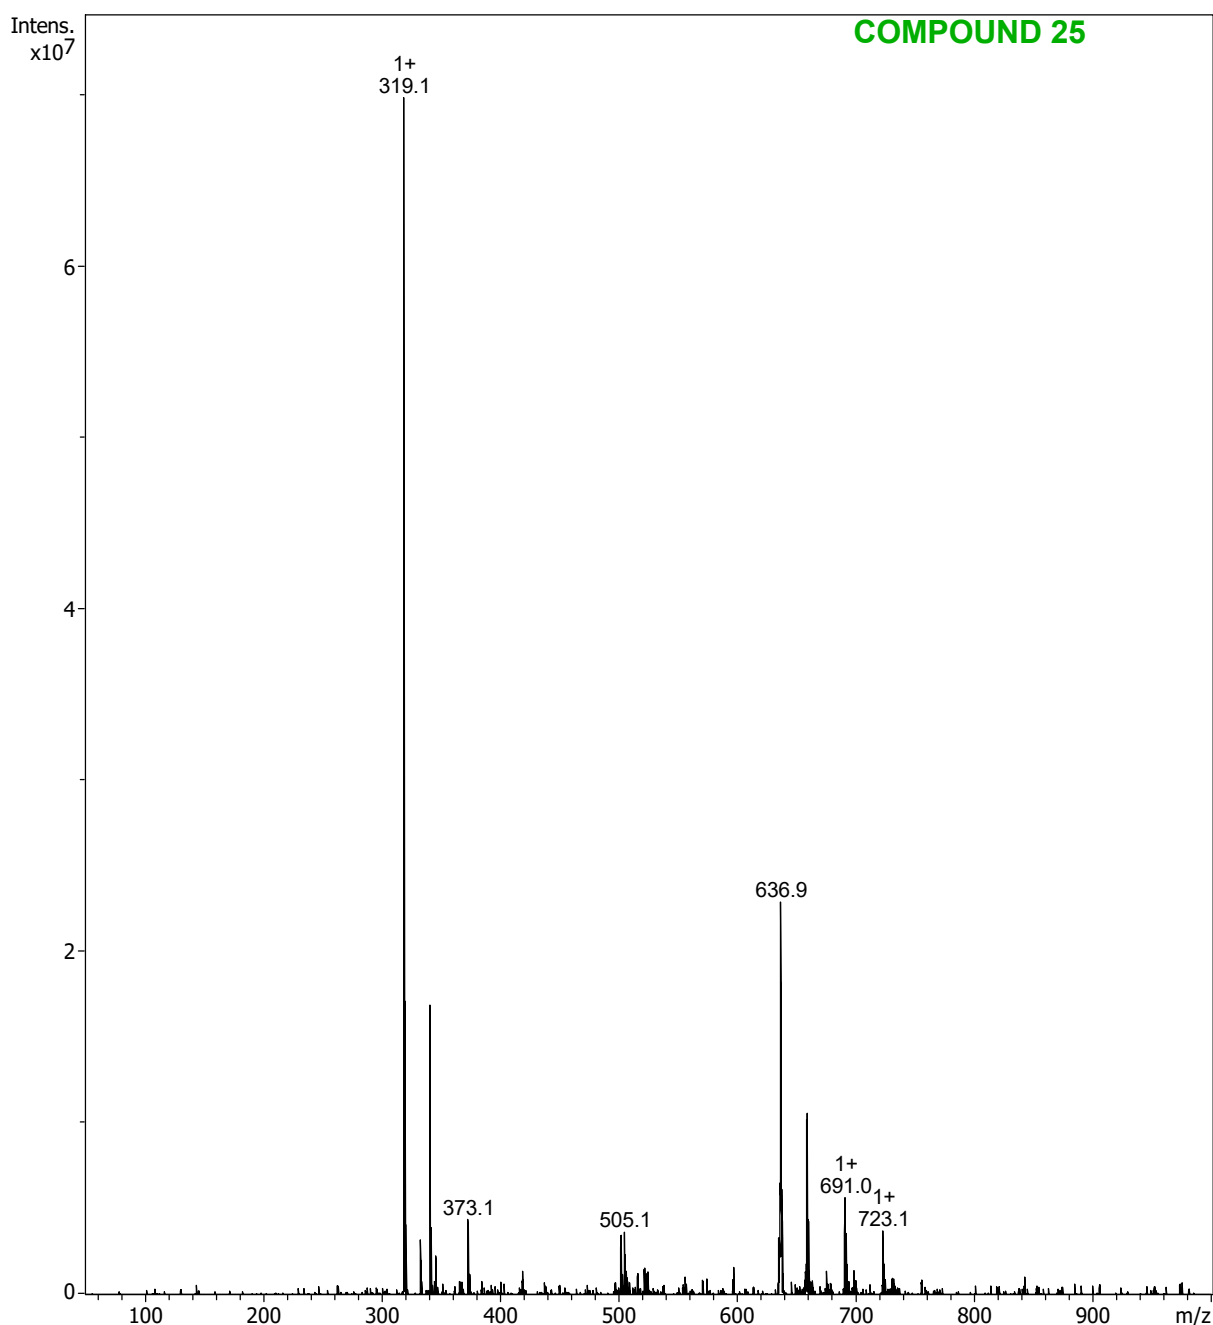

## ESPECTRO ESI-FIA-Ion Trap

### Analysis Info

Sample Name 10 ESI MF3-CM-182B 444\_53\_01\_1149.d  
Method 1149.m

Acquisition Date 12/1/2022 2:42:58 PM  
Instrument amaZon ETD

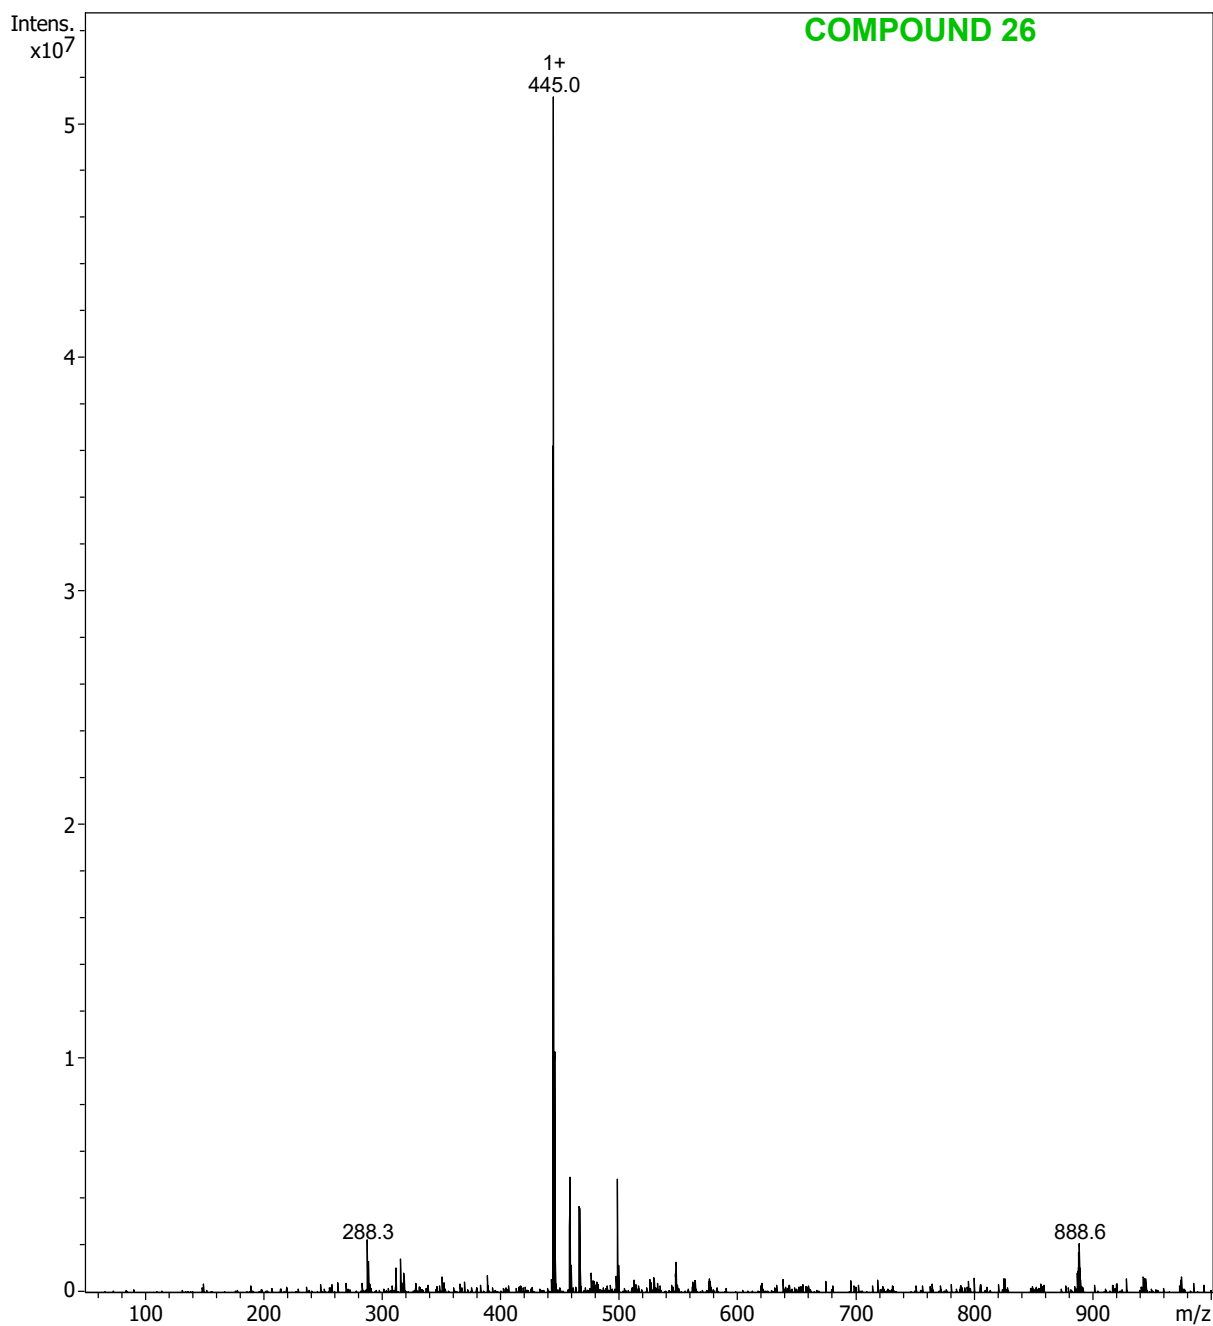

## ESPECTRO ESI-FIA-Ion Trap

### Analysis Info

Sample Name 11 ESI MF3-CM-190 439\_54\_01\_1150.d  
Method 1150.m

Acquisition Date 12/1/2022 2:54:01 PM  
Instrument amaZon ETD

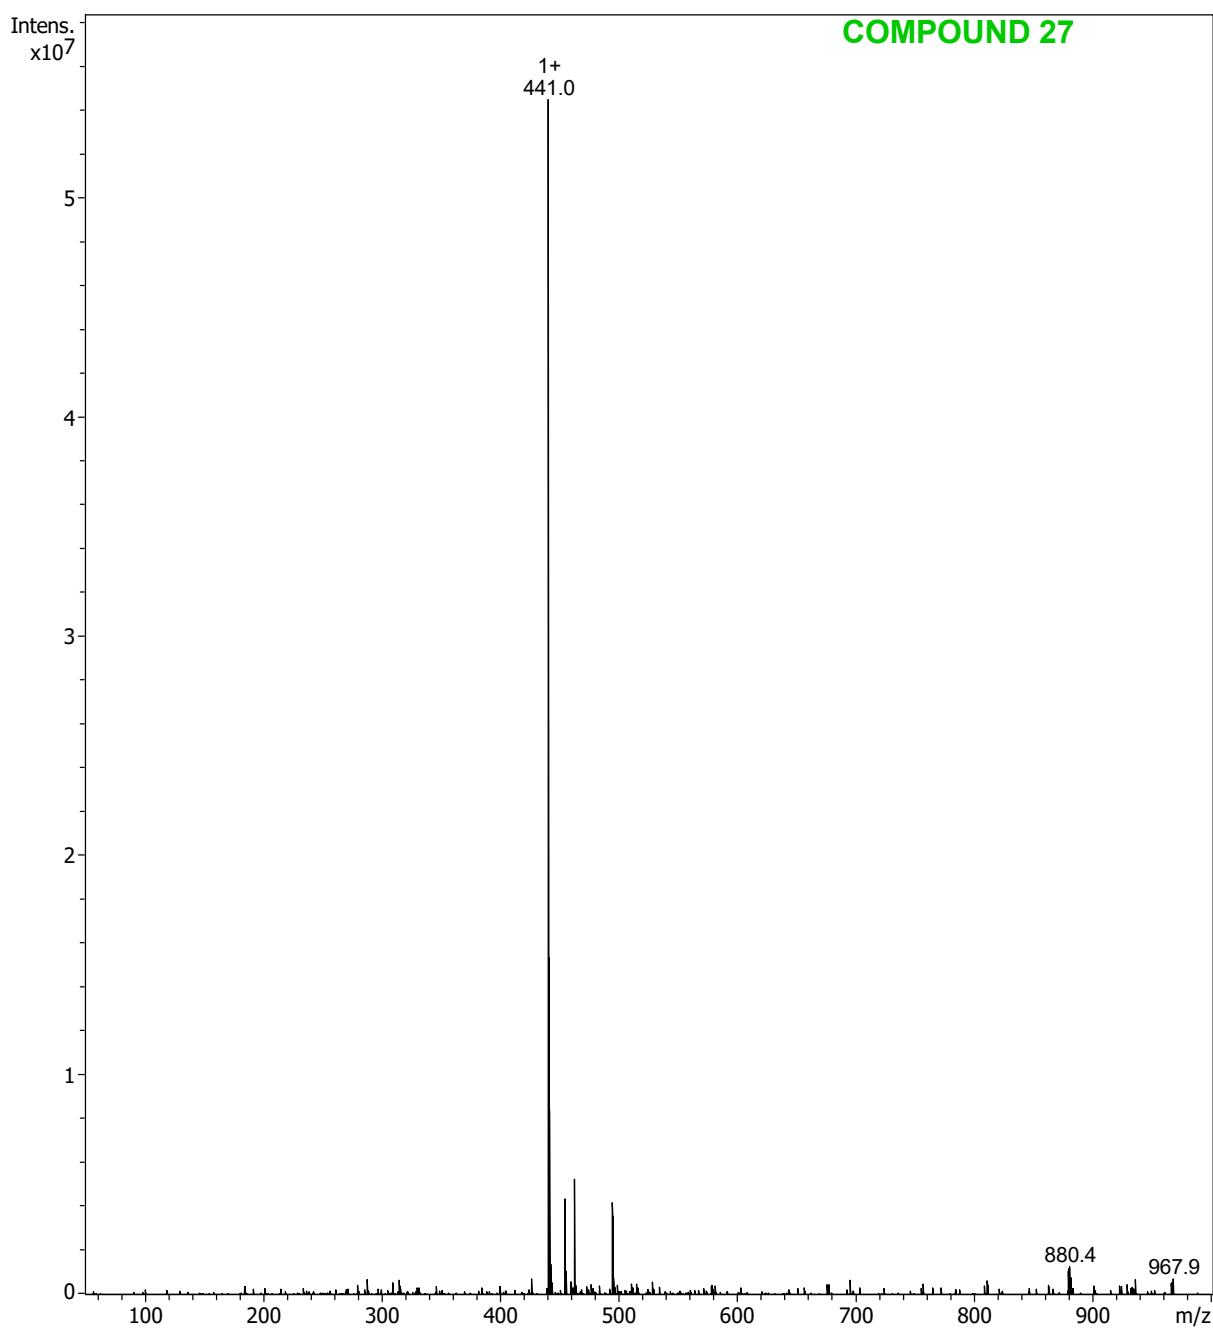

## ESPECTRO ESI-FIA-Ion Trap

### Analysis Info

Sample Name 12 ESI MF3-CM-186 488\_55\_01\_1151.d  
Method 1151.m

Acquisition Date 12/1/2022 3:05:06 PM  
Instrument amaZon ETD

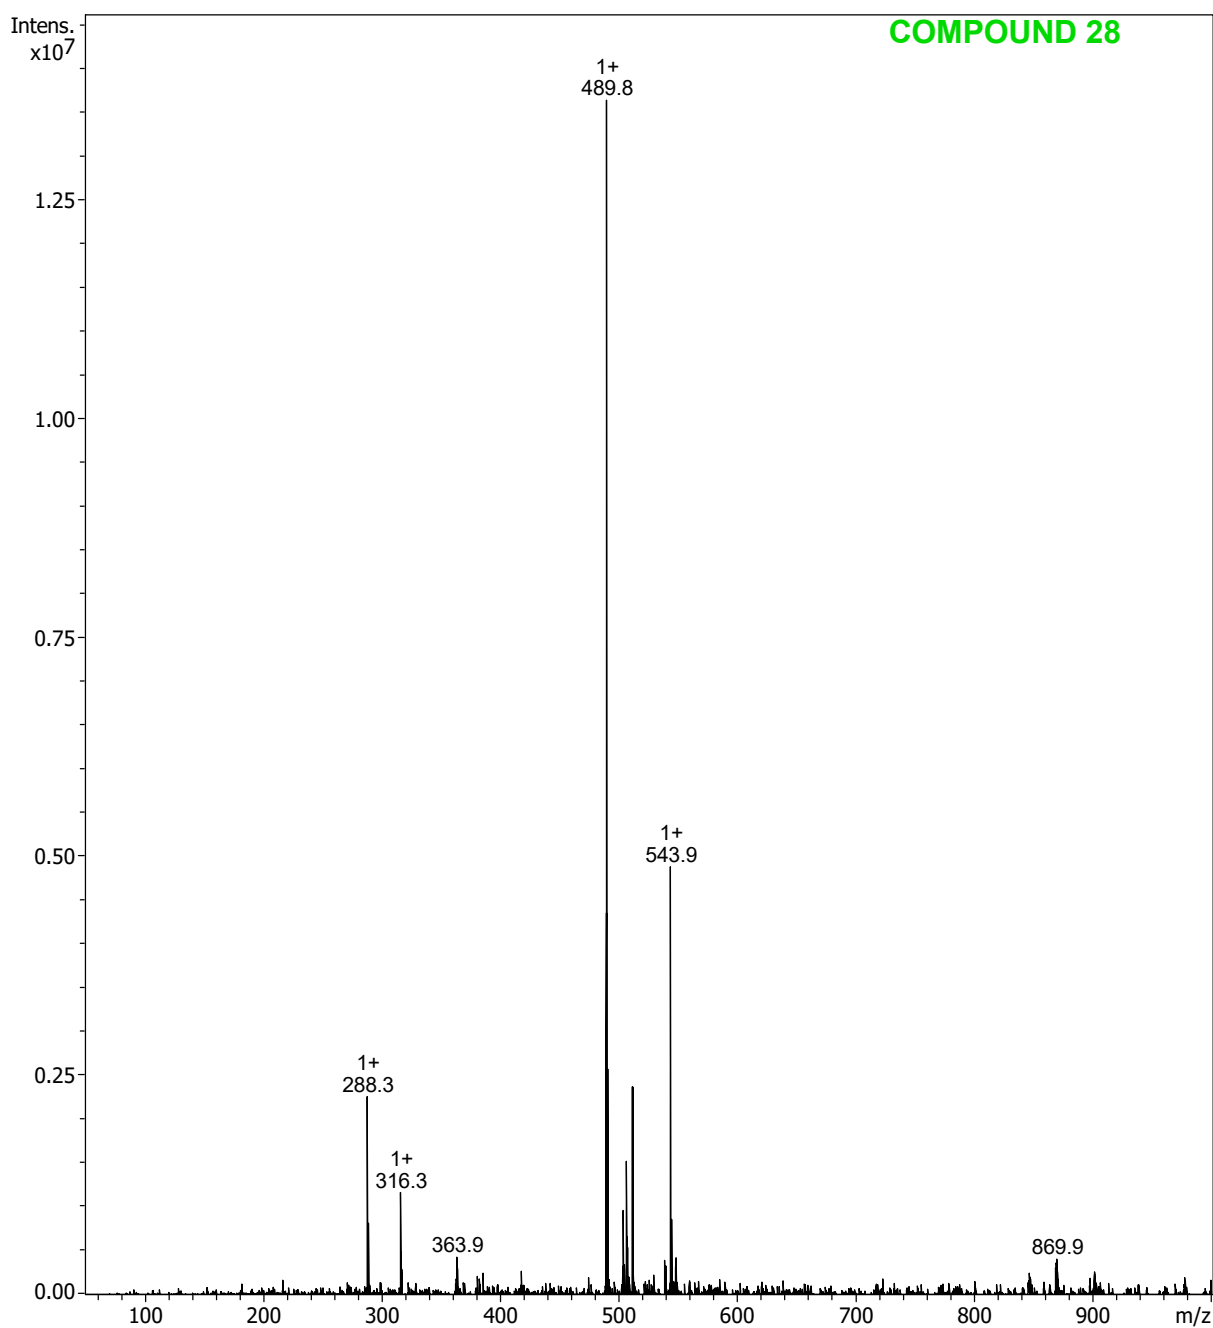

## ESPECTRO ESI-FIA-Ion Trap

### Analysis Info

Sample Name 4 ESI MF3-CM-105 362\_42\_01\_833.d  
Method 833.m

Acquisition Date 04/22/2022 13:22:14  
Instrument amaZon ETD

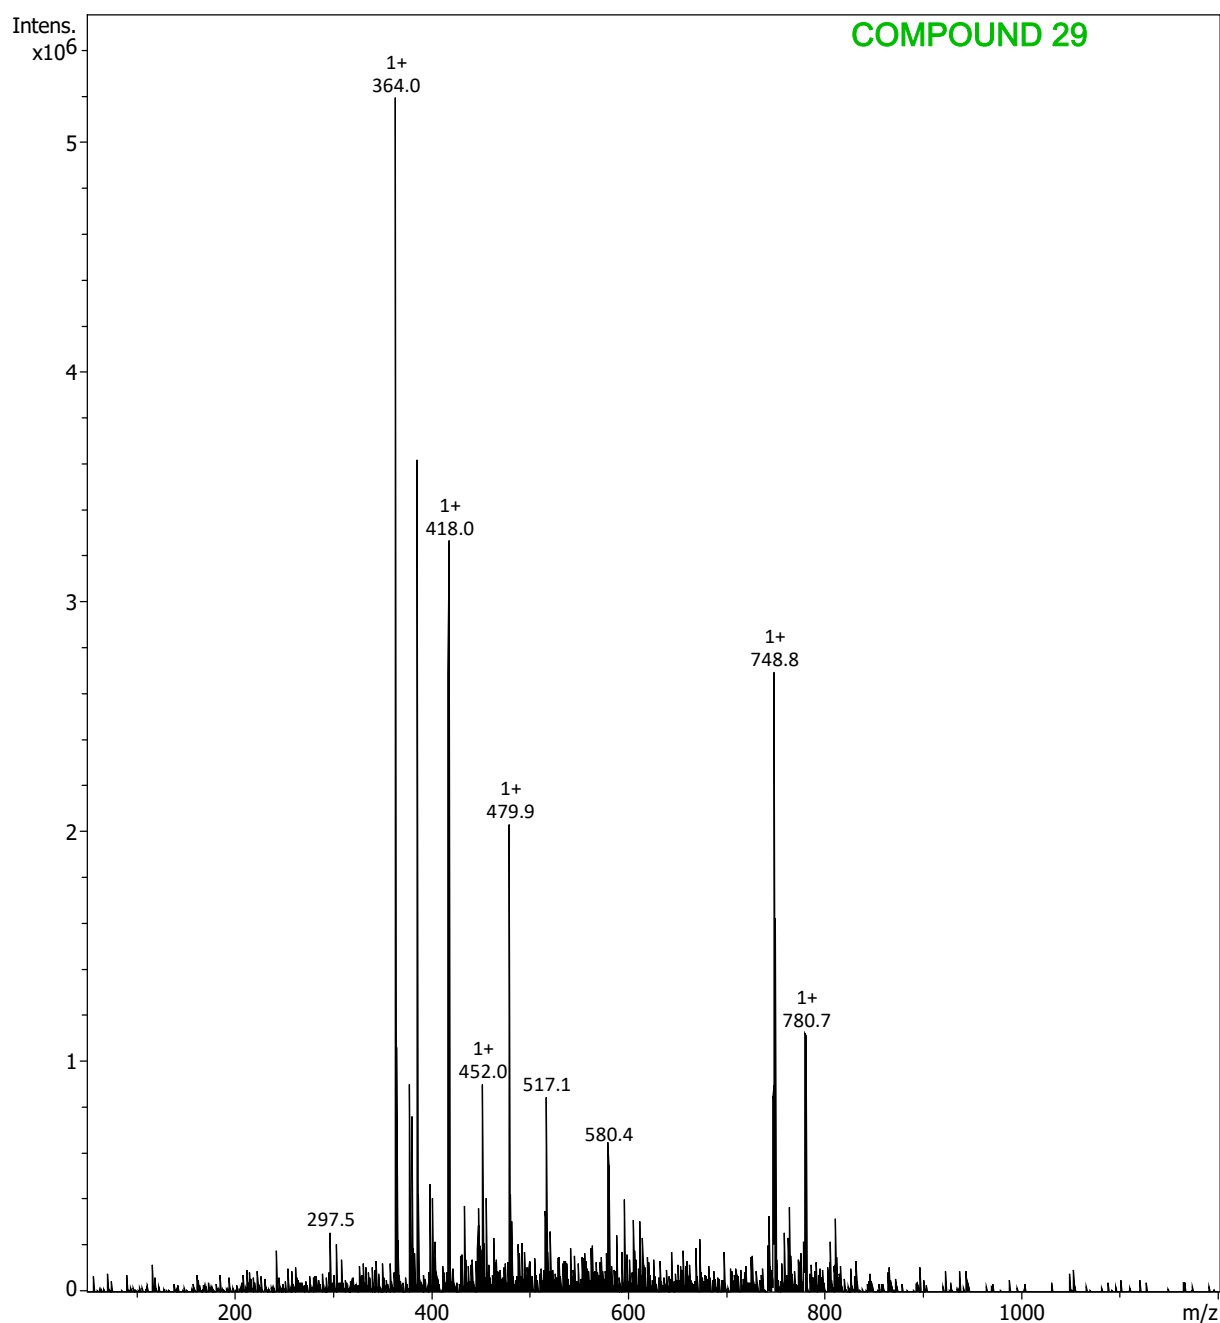

## ESPECTRO ESI-FIA-Ion Trap

### Analysis Info

Sample Name 3 ESI MF3-CM-171 317\_43\_01\_1187.d  
Method 1187.m

Acquisition Date 12/21/2022 13:30:09  
Instrument amaZon ETD

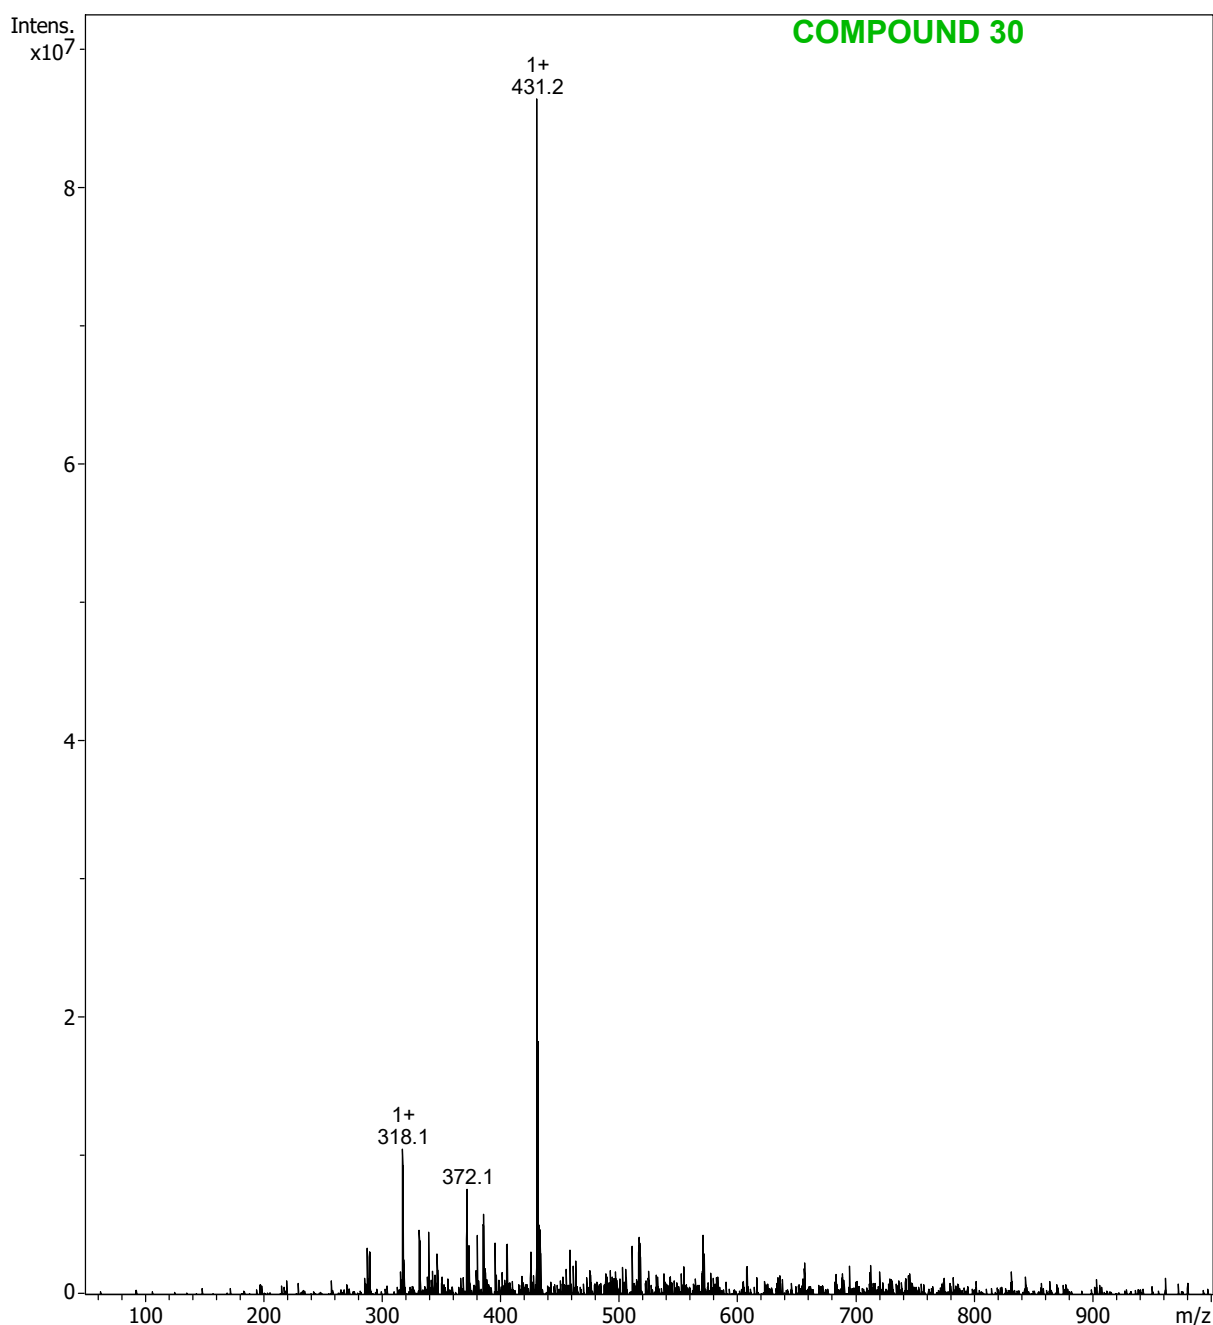

## ESPECTRO ESI-FIA-TOF

### Analysis Info

Sample Name 16 ESI MF3-CM-164 321\_362\_1\_3271.d  
Method FIA ESI POSITIVO 50-1500.m

Acquisition Date 05/13/2022 13:08:38  
Instrument impact II

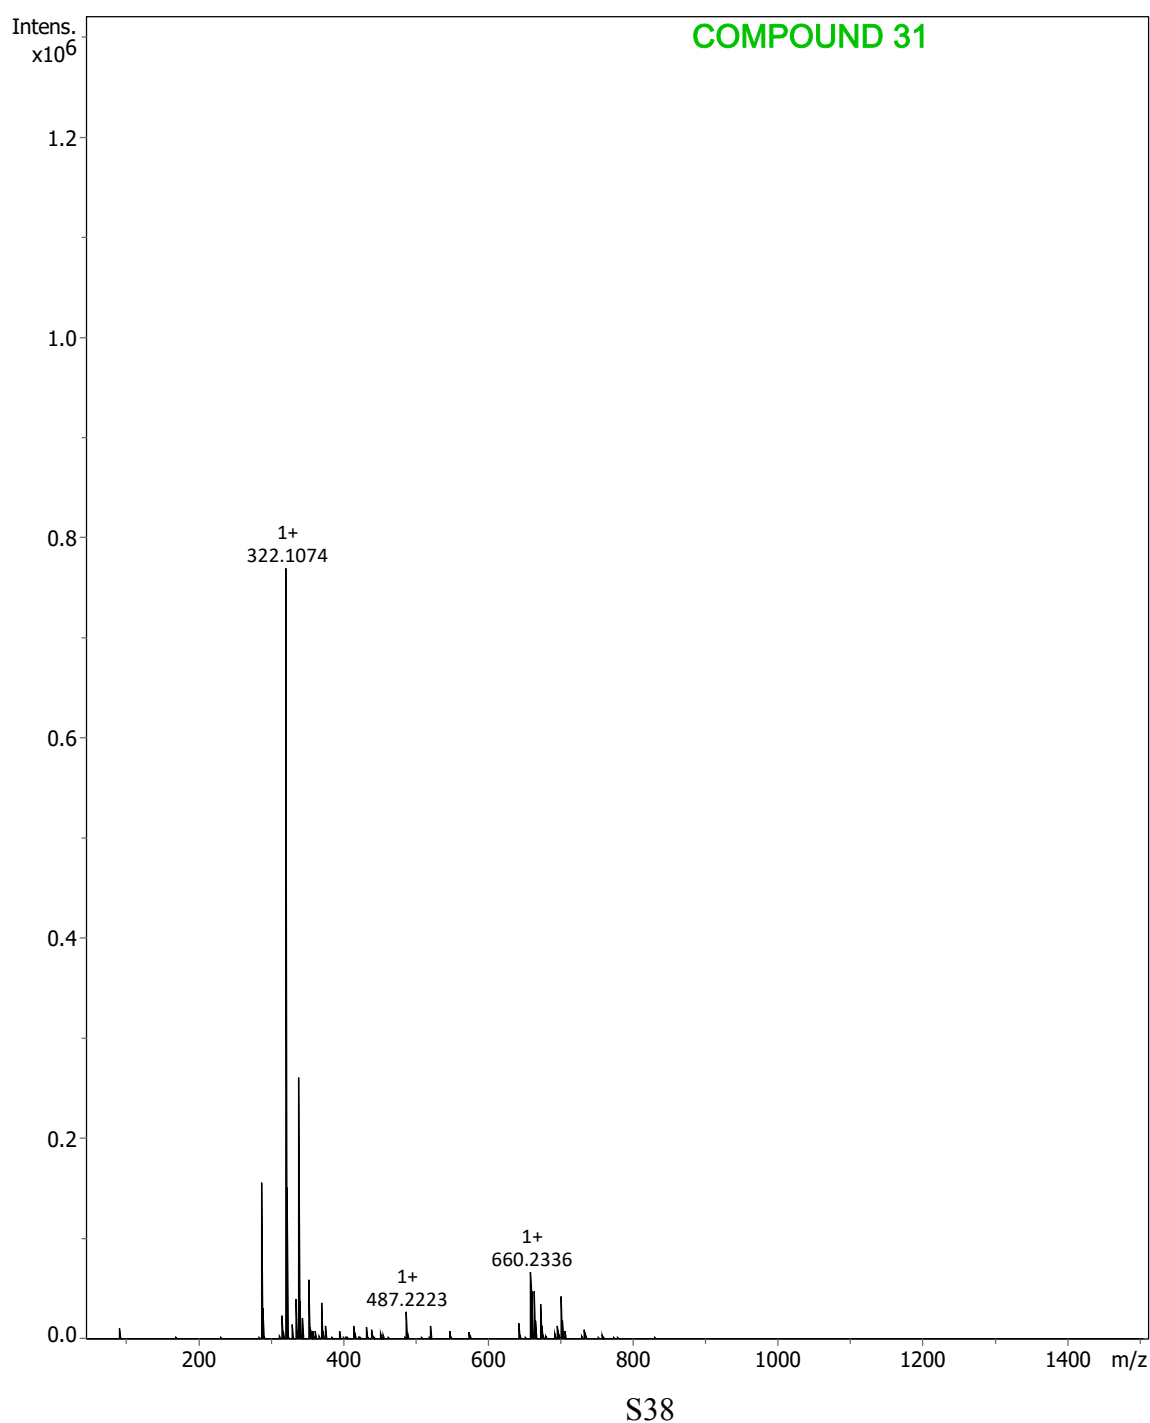

## ESPECTRO ESI-FIA-Ion Trap

### Analysis Info

Sample Name 14 ESI MF3-CM-188A 447\_56\_01\_1153.d  
Method 1153.m

Acquisition Date 12/1/2022 3:27:17 PM  
Instrument amaZon ETD

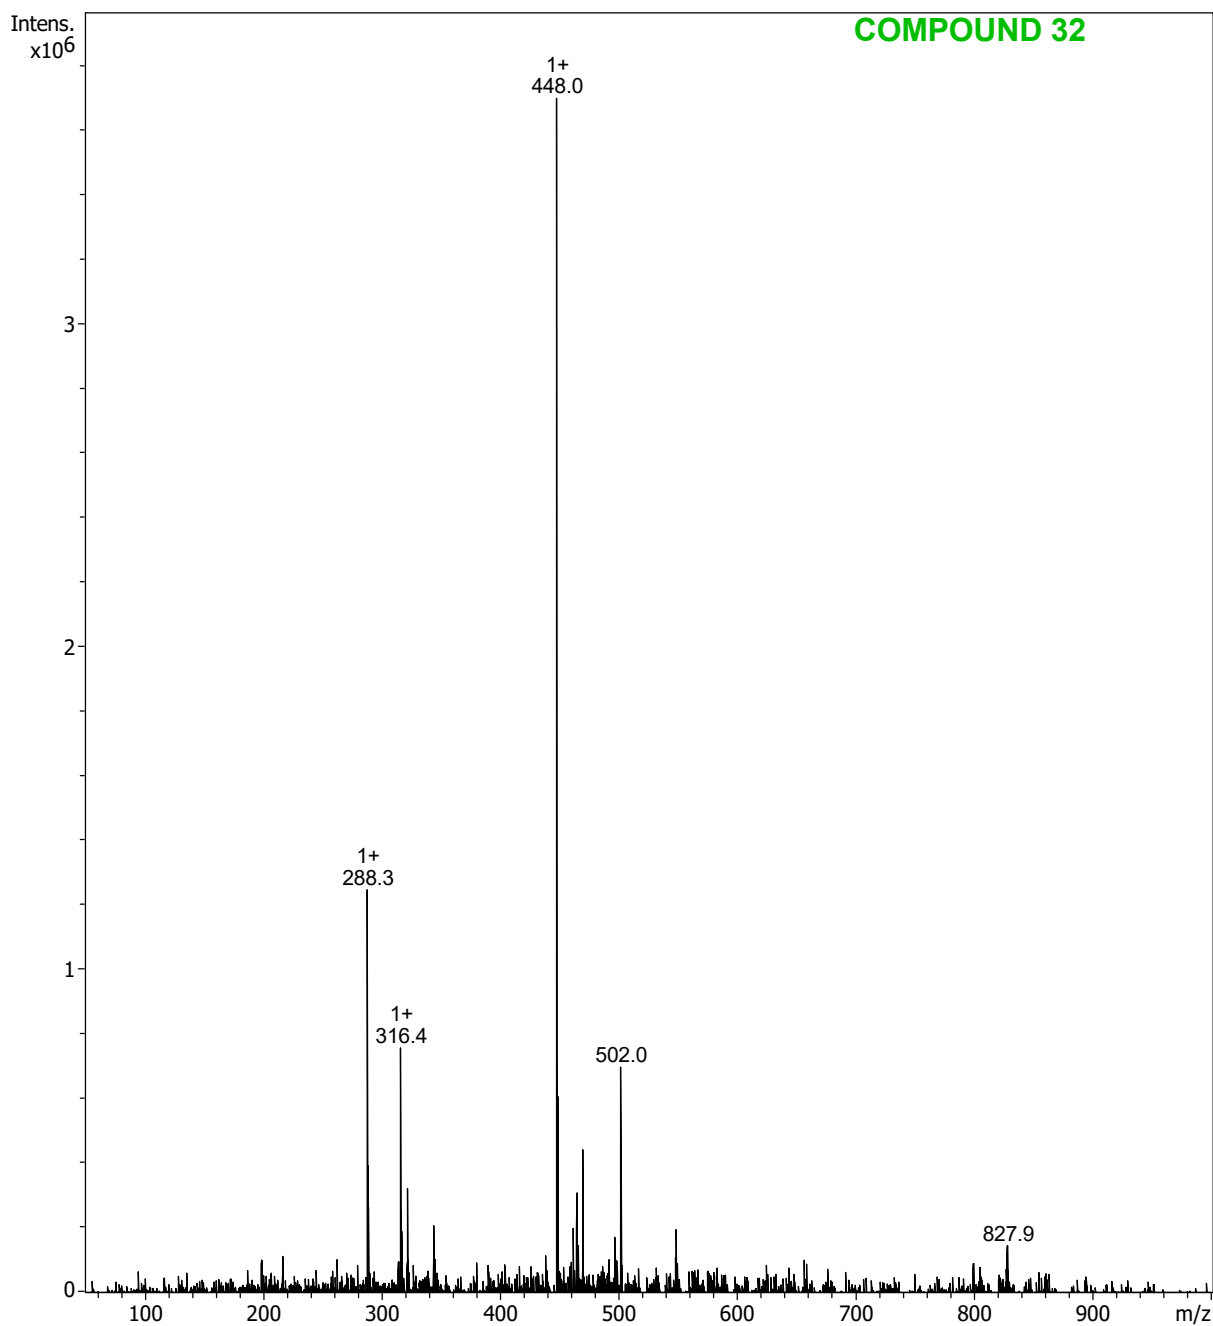



## ESPECTRO ESI-FIA-Ion Trap

### Analysis Info

Sample Name 16 ESI MF3-CM-188b 446\_58\_01\_1155.d  
Method 1155.m

Acquisition Date 12/1/2022 3:49:27 PM  
Instrument amaZon ETD

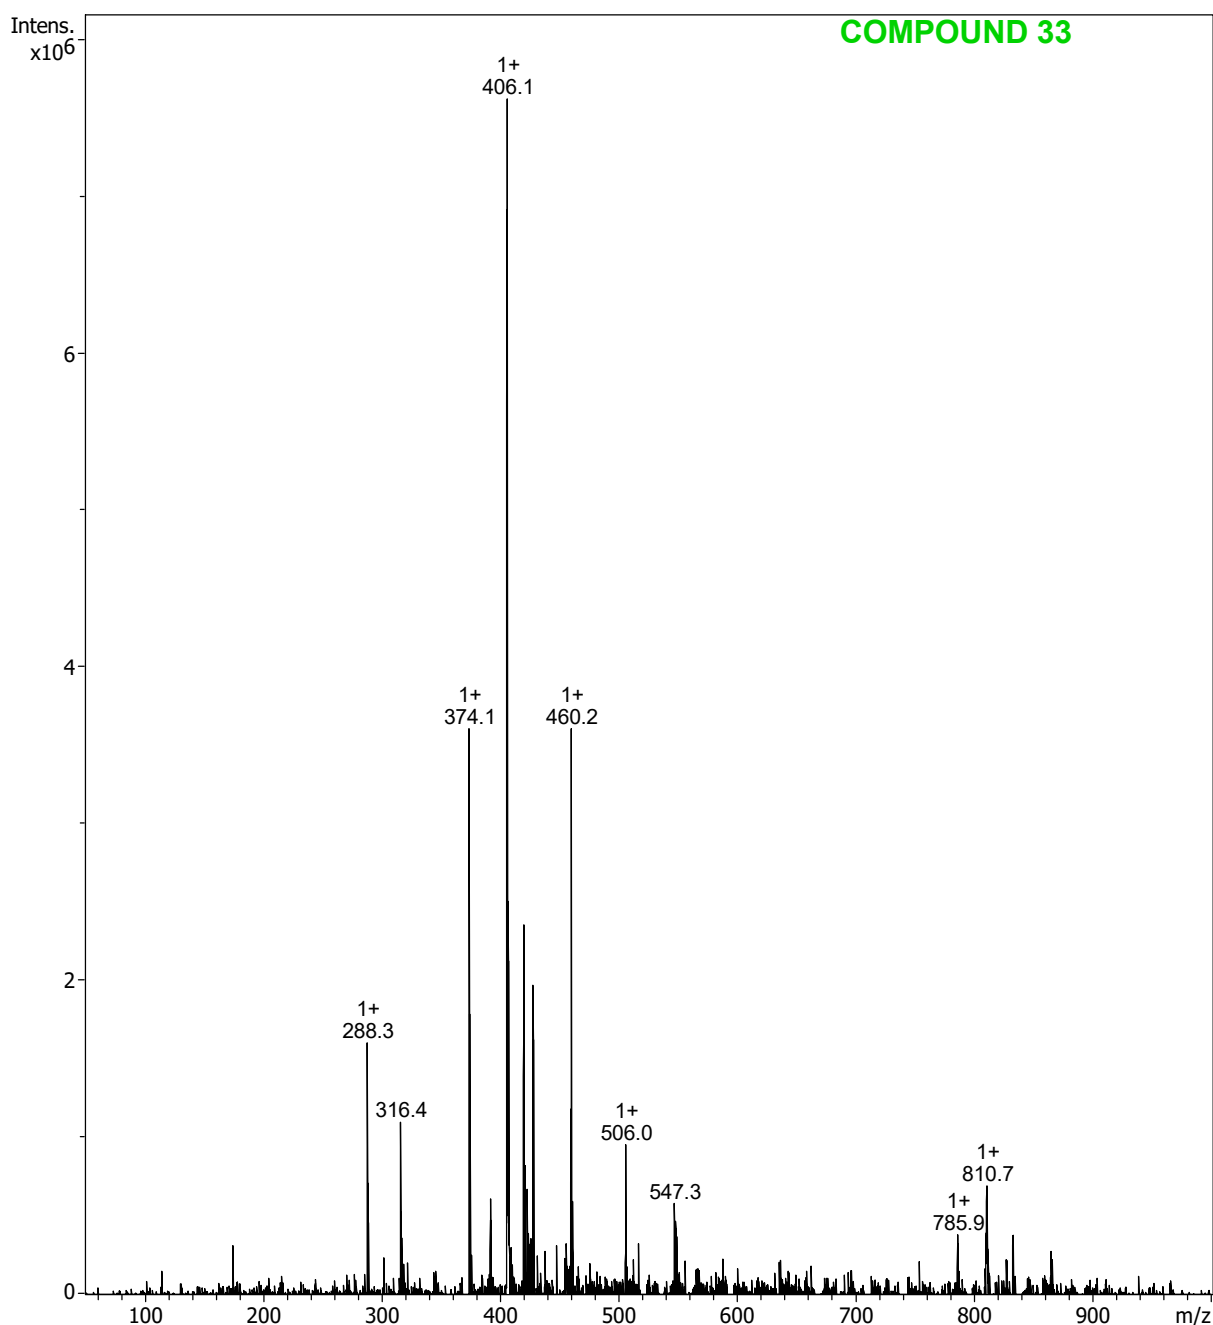

## 5. X-ray crystallographic data of compound 17

### checkCIF/PLATON report

Structure factors have been supplied for datablock(s) 22FMB001

THIS REPORT IS FOR GUIDANCE ONLY. IF USED AS PART OF A REVIEW PROCEDURE FOR PUBLICATION, IT SHOULD NOT REPLACE THE EXPERTISE OF AN EXPERIENCED CRYSTALLOGRAPHIC REFEREE.

No syntax errors found.      CIF dictionary      Interpreting this report

### Datablock: 22FMB001

---

|                        |                    |                                       |
|------------------------|--------------------|---------------------------------------|
| Bond precision:        | C-C = 0.0012 Å     | Wavelength=0.71073                    |
| Cell:                  | a=6.6703 (4)       | b=10.0801 (6)      c=16.8273 (10)     |
|                        | alpha=83.649 (2)   | beta=86.849 (2)      gamma=74.054 (2) |
| Temperature:           | 100 K              |                                       |
|                        | Calculated         | Reported                              |
| Volume                 | 1080.85 (11)       | 1080.85 (11)                          |
| Space group            | P -1               | P -1                                  |
| Hall group             | -P 1               | -P 1                                  |
| Moiety formula         | C19 H23 F3 I N3 O3 | C19 H23 F3 I N3 O3                    |
| Sum formula            | C19 H23 F3 I N3 O3 | C19 H23 F3 I N3 O3                    |
| Mr                     | 525.30             | 525.30                                |
| Dx, g cm <sup>-3</sup> | 1.614              | 1.614                                 |
| Z                      | 2                  | 2                                     |
| Mu (mm <sup>-1</sup> ) | 1.531              | 1.531                                 |
| F000                   | 524.0              | 524.0                                 |
| F000'                  | 523.32             |                                       |
| h, k, lmax             | 11, 17, 30         | 11, 17, 30                            |
| Nref                   | 12881              | 12861                                 |
| Tmin, Tmax             | 0.745, 0.908       | 0.850, 0.910                          |
| Tmin'                  | 0.716              |                                       |

Correction method= # Reported T Limits: Tmin=0.850 Tmax=0.910  
AbsCorr = MULTI-SCAN

Data completeness= 0.998      Theta(max)= 39.390

|                                 |                                   |
|---------------------------------|-----------------------------------|
| R(reflections)= 0.0200 ( 11865) | wR2(reflections)= 0.0476 ( 12861) |
| S = 1.053                       | Npar= 331                         |

---

The following ALERTS were generated. Each ALERT has the format

**test-name\_ALERT\_alert-type\_alert-level.**

Click on the hyperlinks for more details of the test.

---

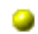

#### **Alert level C**

|                   |            |        |   |                   |       |     |       |
|-------------------|------------|--------|---|-------------------|-------|-----|-------|
| PLAT220_ALERT_2_C | NonSolvent | Resd 1 | C | Ueq(max)/Ueq(min) | Range | 3.1 | Ratio |
|-------------------|------------|--------|---|-------------------|-------|-----|-------|

---

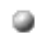

#### **Alert level G**

|                   |                                                  |       |        |
|-------------------|--------------------------------------------------|-------|--------|
| PLAT154_ALERT_1_G | The s.u.'s on the Cell Angles are Equal ..(Note) | 0.002 | Degree |
| PLAT164_ALERT_4_G | Nr. of Refined C-H H-Atoms in Heavy-Atom Struct. | 21    | Note   |
| PLAT793_ALERT_4_G | Model has Chirality at C8 (Centro SPGR)          | R     | Verify |
| PLAT910_ALERT_3_G | Missing # of FCF Reflection(s) Below Theta(Min). | 2     | Note   |
| PLAT912_ALERT_4_G | Missing # of FCF Reflections Above STh/L= 0.600  | 17    | Note   |
| PLAT978_ALERT_2_G | Number C-C Bonds with Positive Residual Density. | 11    | Info   |

---

0 **ALERT level A** = Most likely a serious problem - resolve or explain  
0 **ALERT level B** = A potentially serious problem, consider carefully  
1 **ALERT level C** = Check. Ensure it is not caused by an omission or oversight  
6 **ALERT level G** = General information/check it is not something unexpected

1 ALERT type 1 CIF construction/syntax error, inconsistent or missing data  
2 ALERT type 2 Indicator that the structure model may be wrong or deficient  
1 ALERT type 3 Indicator that the structure quality may be low  
3 ALERT type 4 Improvement, methodology, query or suggestion  
0 ALERT type 5 Informative message, check

---

### **Validation response form**

Please find below a validation response form (VRF) that can be filled in and pasted into your CIF.

```
# start Validation Reply Form
```

```
_vrf_PLAT220_22FMB001
```

```
;
```

```
PROBLEM: NonSolvent    Resd 1  C    Ueq(max)/Ueq(min) Range          3.1 Ratio
```

```
RESPONSE: ...
```

```
;
```

```
# end Validation Reply Form
```

---

It is advisable to attempt to resolve as many as possible of the alerts in all categories. Often the minor alerts point to easily fixed oversights, errors and omissions in your CIF or refinement strategy, so attention to these fine details can be worthwhile. In order to resolve some of the more serious problems it may be necessary to carry out additional measurements or structure refinements. However, the purpose of your study may justify the reported deviations and the more serious of these should normally be commented upon in the discussion or experimental section of a paper or in the "special\_details" fields of the CIF. checkCIF was carefully designed to identify outliers and unusual parameters, but every test has its limitations and alerts that are not important in a particular case may appear. Conversely, the absence of alerts does not guarantee there are no aspects of the results needing attention. It is up to the individual to critically assess their own results and, if necessary, seek expert advice.

### **Publication of your CIF in IUCr journals**

A basic structural check has been run on your CIF. These basic checks will be run on all CIFs submitted for publication in IUCr journals (*Acta Crystallographica*, *Journal of Applied Crystallography*, *Journal of Synchrotron Radiation*); however, if you intend to submit to *Acta Crystallographica Section C* or *E* or *IUCrData*, you should make sure that full publication checks are run on the final version of your CIF prior to submission.

### **Publication of your CIF in other journals**

Please refer to the *Notes for Authors* of the relevant journal for any special instructions relating to CIF submission.

---

**PLATON version of 18/05/2022; check.def file version of 17/05/2022**

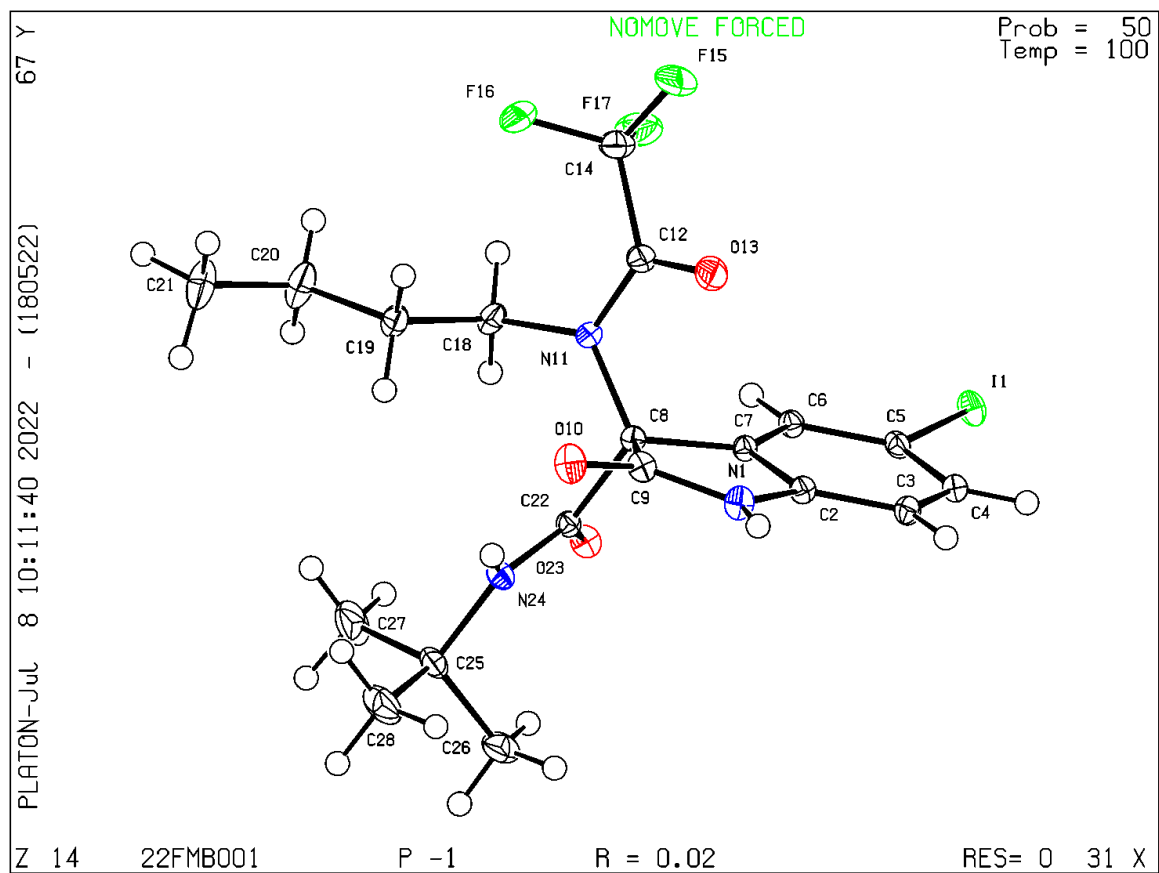

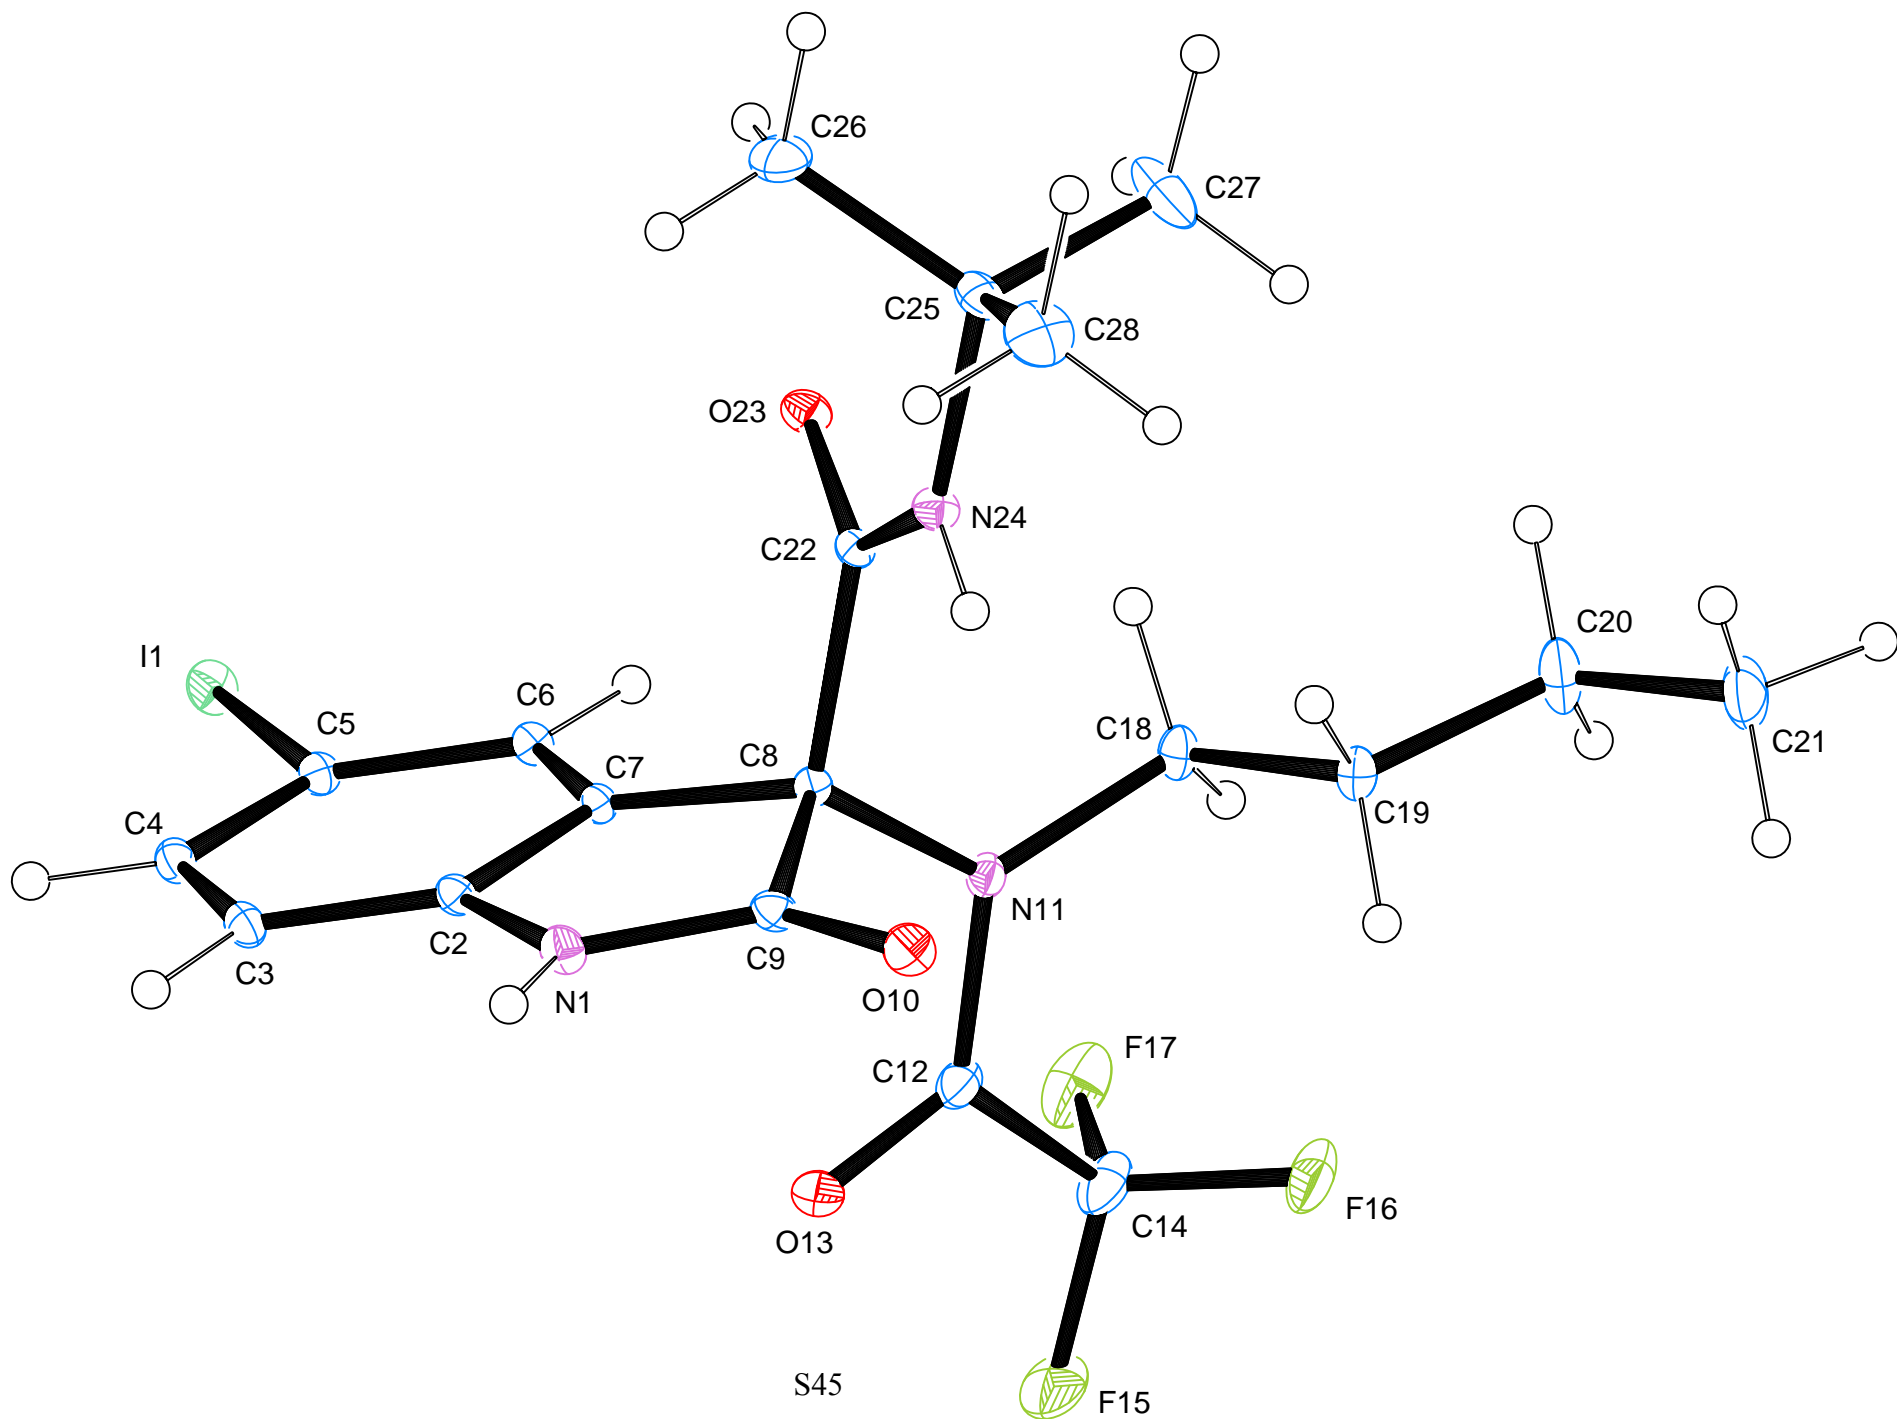

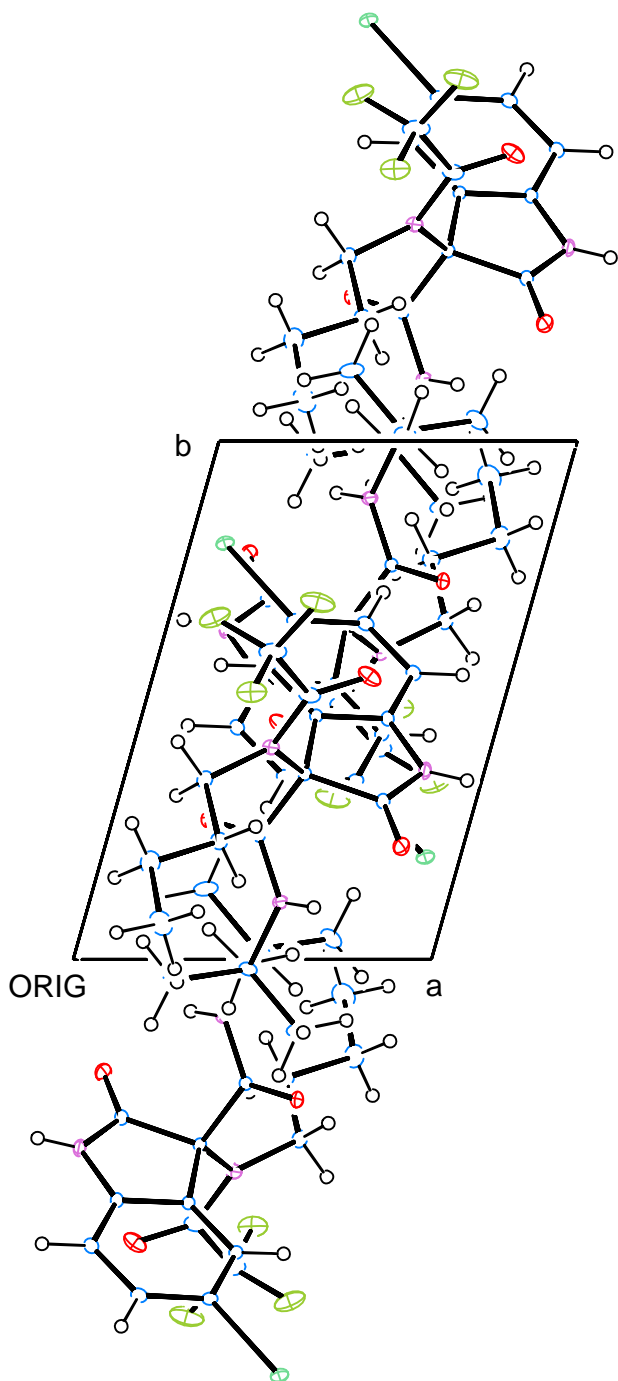

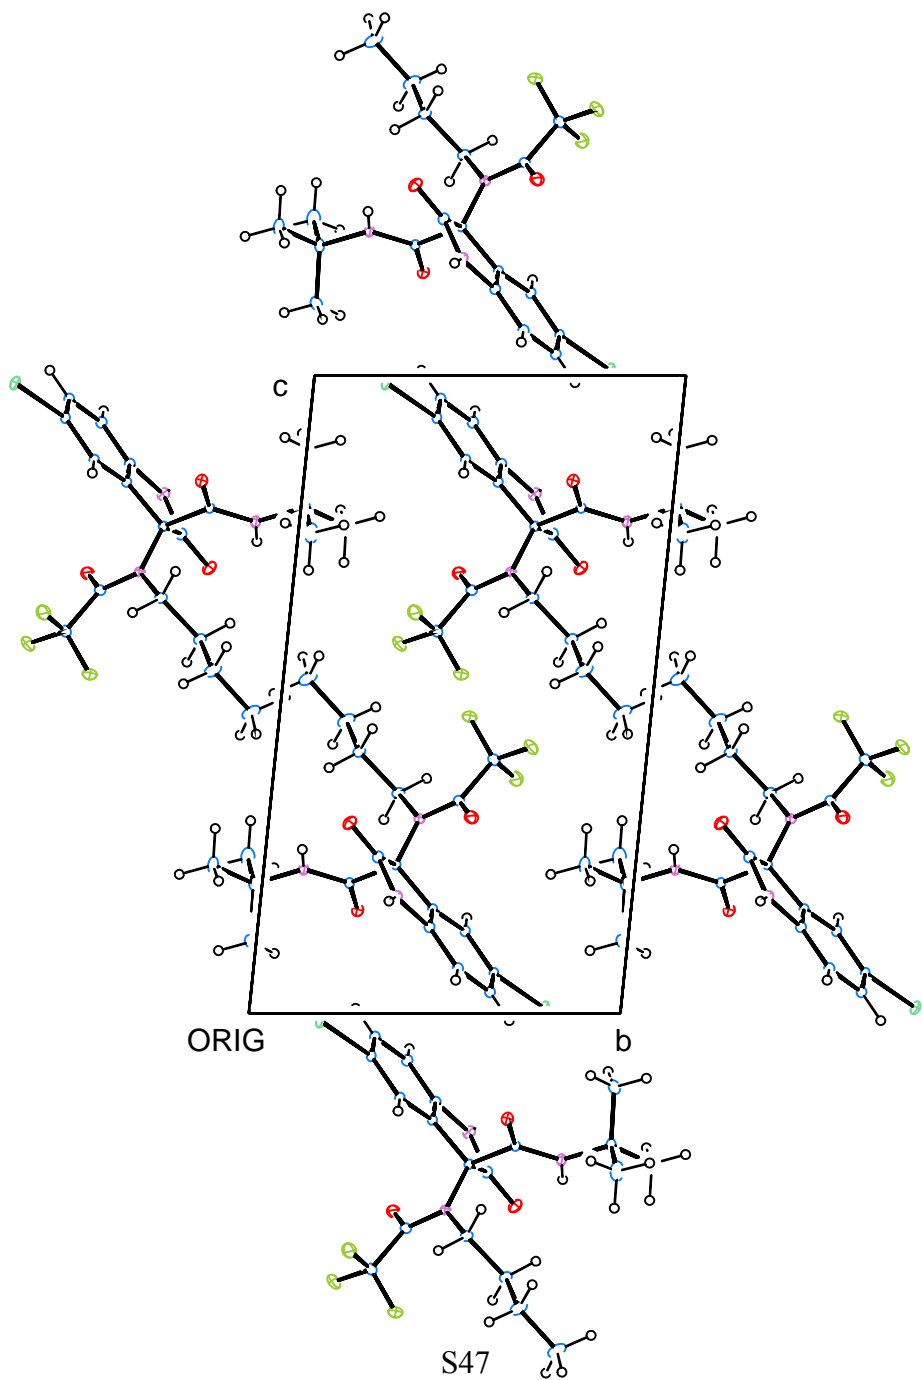



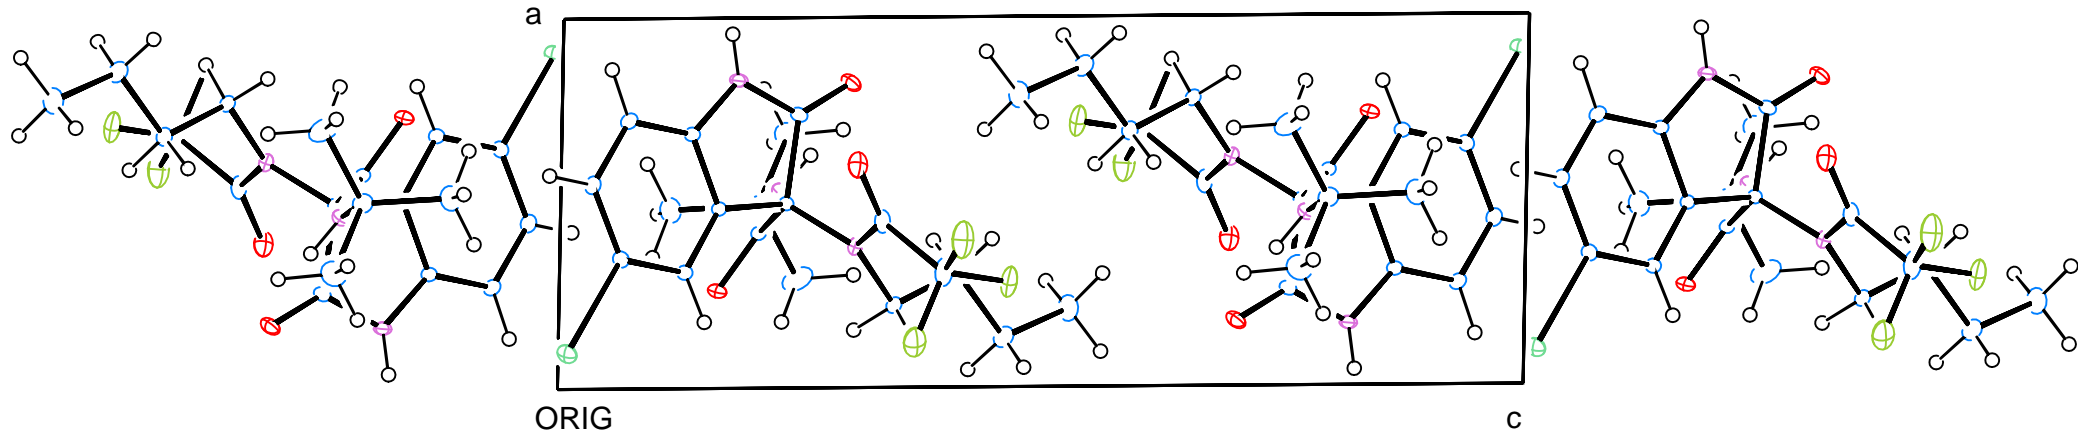

S48

# Title

**Antonio L. Llamas-Saiz**

X-Ray Unit. Research Infrastructures Area, CACTUS Bldg., Campus VIDA, University of Santiago de Compostela, E-15782 Santiago de Compostela, Spain

## Abstract

## Related literature

## Computing details

Data collection: Bruker *APEX4* software; cell refinement: *SAINT* V8.40B (Bruker AXS LLC, 2019); data reduction: *SAINT* V8.40B (Bruker AXS LLC, 2019); program(s) used to solve structure: *SHELXT* 2018/2 (Sheldrick, 2015); program(s) used to refine structure: *SHELXL* 2019/1 (Sheldrick, 2019); molecular graphics: *ORTEP* 2014.1 (Farrugia, 2012); software used to prepare material for publication: IUCr Journals printCIF.

## Acknowledgements

## Funding information

## References

## Figure 1

(22FMB001)

### Crystal data

$C_{19}H_{23}F_3IN_3O_3$   
 $M_r = 525.30$   
 Triclinic,  $P\bar{1}$   
 $a = 6.6703$  (4) Å  
 $b = 10.0801$  (6) Å  
 $c = 16.8273$  (10) Å  
 $\alpha = 83.649$  (2)°  
 $\beta = 86.849$  (2)°  
 $\gamma = 74.054$  (2)°  
 $V = 1080.85$  (11) Å<sup>3</sup>

$Z = 2$   
 $F(000) = 524$   
 $D_x = 1.614$  Mg m<sup>-3</sup>  
 Mo  $K\alpha$  radiation,  $\lambda = 0.71073$  Å  
 Cell parameters from 9733 reflections  
 $\theta = 2.3$ – $39.3^\circ$   
 $\mu = 1.53$  mm<sup>-1</sup>  
 $T = 100$  K  
 Block, clear colourless  
 0.21 × 0.17 × 0.06 mm

### Data collection

Bruker D8 VENTURE PHOTON-III C14  
 diffractometer  
 Radiation source: microfocus sealed tube, Incoatec  
 $I\mu S$  3.0  
 Multilayer mirror monochromator  
 Detector resolution: 7.3910 pixels mm<sup>-1</sup>  
 $\varphi$  or  $\omega$  oscillation scans

Absorption correction: multi-scan  
 Krause, L., Herbst-Irmer, R., Sheldrick, G. M.,  
 Stalke, D. (2015). "Comparison of silver and  
 molybdenum microfocus X-ray sources for single-  
 crystal structure determination" *J. Appl. Cryst.* 48,  
 3–10. doi:10.1107/S1600576714022985  
 $T_{\min} = 0.85$ ,  $T_{\max} = 0.91$   
 112325 measured reflections  
 12861 independent reflections  
 11865 reflections with  $I > 2\sigma(I)$   
 $R_{\text{int}} = 0.036$   
 $\theta_{\max} = 39.4^\circ$ ,  $\theta_{\min} = 2.3^\circ$

$h = -11 \rightarrow 11$   
 $k = -17 \rightarrow 17$

$l = -30 \rightarrow 30$

### Refinement

Refinement on  $F^2$   
 Least-squares matrix: full  
 $R[F^2 > 2\sigma(F^2)] = 0.020$   
 $wR(F^2) = 0.048$   
 $S = 1.05$   
 12861 reflections  
 331 parameters  
 0 restraints  
 Primary atom site location: dual

Secondary atom site location: difference Fourier map  
 Hydrogen site location: difference Fourier map  
 Only H-atom coordinates refined  
 $w = 1/[\sigma^2(F_o^2) + (0.0198P)^2 + 0.3032P]$   
 where  $P = (F_o^2 + 2F_c^2)/3$   
 $(\Delta/\sigma)_{\max} = 0.004$   
 $\Delta\rho_{\max} = 0.66 \text{ e } \text{\AA}^{-3}$   
 $\Delta\rho_{\min} = -0.70 \text{ e } \text{\AA}^{-3}$

### Special details

*Geometry.* All e.s.d.'s (except the e.s.d. in the dihedral angle between two l.s. planes) are estimated using the full covariance matrix. The cell e.s.d.'s are taken into account individually in the estimation of e.s.d.'s in distances, angles and torsion angles; correlations between e.s.d.'s in cell parameters are only used when they are defined by crystal symmetry. An approximate (isotropic) treatment of cell e.s.d.'s is used for estimating e.s.d.'s involving l.s. planes.

### Fractional atomic coordinates and isotropic or equivalent isotropic displacement parameters ( $\text{\AA}^2$ )

|      | <i>x</i>     | <i>y</i>     | <i>z</i>    | $U_{\text{iso}}^*/U_{\text{eq}}$ |
|------|--------------|--------------|-------------|----------------------------------|
| I1   | 0.09709 (2)  | 0.80277 (2)  | 0.01168 (2) | 0.01746 (10)                     |
| N1   | 0.83216 (10) | 0.36529 (7)  | 0.18333 (4) | 0.01473 (10)                     |
| H1   | 0.957 (2)    | 0.3465 (14)  | 0.1762 (8)  | 0.018000*                        |
| C2   | 0.68732 (11) | 0.46564 (7)  | 0.13636 (4) | 0.01198 (10)                     |
| C3   | 0.72412 (12) | 0.55300 (8)  | 0.07117 (5) | 0.01402 (11)                     |
| H3   | 0.863 (2)    | 0.5490 (14)  | 0.0526 (8)  | 0.017000*                        |
| C4   | 0.55197 (12) | 0.64821 (7)  | 0.03486 (4) | 0.01401 (11)                     |
| H4   | 0.578 (2)    | 0.7077 (14)  | −0.0099 (8) | 0.017000*                        |
| C5   | 0.35109 (11) | 0.65516 (7)  | 0.06533 (4) | 0.01265 (10)                     |
| C6   | 0.31411 (11) | 0.56671 (7)  | 0.13132 (4) | 0.01197 (10)                     |
| H6   | 0.180 (2)    | 0.5693 (13)  | 0.1525 (8)  | 0.014000*                        |
| C7   | 0.48538 (10) | 0.47110 (7)  | 0.16559 (4) | 0.01058 (9)                      |
| C8   | 0.49842 (10) | 0.35981 (7)  | 0.23472 (4) | 0.01074 (10)                     |
| C9   | 0.73856 (11) | 0.30716 (8)  | 0.24616 (5) | 0.01344 (11)                     |
| O10  | 0.82396 (10) | 0.22072 (7)  | 0.29922 (4) | 0.01859 (10)                     |
| N11  | 0.38239 (10) | 0.41181 (7)  | 0.30704 (4) | 0.01345 (10)                     |
| C12  | 0.44897 (15) | 0.51293 (8)  | 0.33515 (5) | 0.01823 (13)                     |
| O13  | 0.60186 (12) | 0.54880 (7)  | 0.30875 (4) | 0.02351 (13)                     |
| C14  | 0.31135 (19) | 0.59693 (10) | 0.39980 (6) | 0.02614 (18)                     |
| F15  | 0.39814 (15) | 0.69233 (7)  | 0.41920 (4) | 0.03885 (18)                     |
| F16  | 0.28382 (12) | 0.51971 (7)  | 0.46738 (4) | 0.03041 (14)                     |
| F17  | 0.12288 (13) | 0.66281 (7)  | 0.37105 (4) | 0.03554 (16)                     |
| C18  | 0.22267 (12) | 0.34978 (8)  | 0.34804 (5) | 0.01546 (12)                     |
| H18A | 0.156 (2)    | 0.3187 (14)  | 0.3066 (8)  | 0.019000*                        |
| H18B | 0.118 (2)    | 0.4229 (14)  | 0.3712 (8)  | 0.019000*                        |
| C19  | 0.31038 (13) | 0.23197 (8)  | 0.41248 (5) | 0.01657 (12)                     |
| H19A | 0.396 (2)    | 0.1545 (15)  | 0.3872 (8)  | 0.020000*                        |
| H19B | 0.400 (2)    | 0.2600 (15)  | 0.4481 (8)  | 0.020000*                        |
| C20  | 0.13447 (16) | 0.19076 (12) | 0.46165 (6) | 0.02675 (18)                     |
| H20A | 0.052 (3)    | 0.2669 (17)  | 0.4832 (10) | 0.032000*                        |
| H20B | 0.047 (2)    | 0.1615 (17)  | 0.4250 (10) | 0.032000*                        |

|      |              |               |             |              |
|------|--------------|---------------|-------------|--------------|
| C21  | 0.2113 (2)   | 0.07467 (13)  | 0.52753 (7) | 0.0312 (2)   |
| H21A | 0.285 (3)    | −0.014 (2)    | 0.5037 (11) | 0.047000*    |
| H21B | 0.094 (3)    | 0.0567 (19)   | 0.5619 (11) | 0.047000*    |
| H21C | 0.305 (3)    | 0.097 (2)     | 0.5626 (11) | 0.047000*    |
| C22  | 0.41867 (10) | 0.24117 (7)   | 0.20629 (4) | 0.01098 (10) |
| O23  | 0.26339 (8)  | 0.27194 (6)   | 0.16440 (4) | 0.01470 (9)  |
| N24  | 0.53178 (10) | 0.11250 (6)   | 0.22777 (4) | 0.01359 (10) |
| H24  | 0.629 (2)    | 0.1024 (14)   | 0.2583 (8)  | 0.016000*    |
| C25  | 0.49394 (13) | −0.01688 (8)  | 0.20490 (5) | 0.01723 (12) |
| C26  | 0.48183 (17) | −0.00927 (10) | 0.11394 (6) | 0.02395 (16) |
| H26A | 0.607 (3)    | 0.0101 (18)   | 0.0892 (10) | 0.036000*    |
| H26B | 0.355 (3)    | 0.0588 (18)   | 0.0962 (10) | 0.036000*    |
| H26C | 0.472 (3)    | −0.0933 (18)  | 0.1002 (10) | 0.036000*    |
| C27  | 0.29397 (19) | −0.03820 (11) | 0.24637 (9) | 0.0326 (2)   |
| H27A | 0.179 (3)    | 0.036 (2)     | 0.2309 (11) | 0.049000*    |
| H27B | 0.304 (3)    | −0.041 (2)    | 0.3043 (12) | 0.049000*    |
| H27C | 0.266 (3)    | −0.123 (2)    | 0.2337 (11) | 0.049000*    |
| C28  | 0.68293 (18) | −0.13407 (9)  | 0.23339 (7) | 0.02786 (19) |
| H28A | 0.663 (3)    | −0.2220 (19)  | 0.2190 (10) | 0.042000*    |
| H28B | 0.697 (3)    | −0.1384 (19)  | 0.2908 (11) | 0.042000*    |
| H28C | 0.808 (3)    | −0.1160 (19)  | 0.2081 (11) | 0.042000*    |

*Atomic displacement parameters (Å<sup>2</sup>)*

|     | $U^{11}$     | $U^{22}$    | $U^{33}$    | $U^{12}$      | $U^{13}$      | $U^{23}$      |
|-----|--------------|-------------|-------------|---------------|---------------|---------------|
| I1  | 0.01787 (2)  | 0.01155 (2) | 0.02040 (2) | −0.00108 (10) | −0.00367 (2)  | 0.00356 (10)  |
| N1  | 0.0085 (2)   | 0.0175 (3)  | 0.0174 (3)  | −0.00300 (18) | −0.00130 (19) | 0.0009 (2)    |
| C2  | 0.0100 (2)   | 0.0128 (2)  | 0.0133 (3)  | −0.00359 (19) | −0.00009 (19) | −0.0011 (2)   |
| C3  | 0.0136 (3)   | 0.0139 (3)  | 0.0152 (3)  | −0.0053 (2)   | 0.0024 (2)    | −0.0013 (2)   |
| C4  | 0.0171 (3)   | 0.0121 (2)  | 0.0133 (3)  | −0.0052 (2)   | 0.0015 (2)    | −0.0010 (2)   |
| C5  | 0.0142 (3)   | 0.0094 (2)  | 0.0137 (3)  | −0.00236 (19) | −0.0016 (2)   | −0.00014 (19) |
| C6  | 0.0111 (2)   | 0.0109 (2)  | 0.0134 (3)  | −0.00243 (19) | −0.0003 (2)   | −0.0004 (2)   |
| C7  | 0.0098 (2)   | 0.0106 (2)  | 0.0113 (2)  | −0.00281 (18) | −0.00002 (18) | −0.00058 (19) |
| C8  | 0.0099 (2)   | 0.0108 (2)  | 0.0112 (2)  | −0.00230 (18) | −0.00049 (18) | −0.00059 (19) |
| C9  | 0.0110 (2)   | 0.0139 (3)  | 0.0158 (3)  | −0.0038 (2)   | −0.0030 (2)   | −0.0004 (2)   |
| O10 | 0.0155 (2)   | 0.0193 (2)  | 0.0200 (3)  | −0.00409 (19) | −0.00721 (19) | 0.0045 (2)    |
| N11 | 0.0165 (2)   | 0.0126 (2)  | 0.0110 (2)  | −0.00398 (19) | 0.00177 (19)  | −0.00155 (18) |
| C12 | 0.0285 (4)   | 0.0144 (3)  | 0.0123 (3)  | −0.0063 (3)   | −0.0008 (3)   | −0.0018 (2)   |
| O13 | 0.0349 (4)   | 0.0228 (3)  | 0.0187 (3)  | −0.0169 (3)   | −0.0005 (2)   | −0.0037 (2)   |
| C14 | 0.0437 (5)   | 0.0170 (3)  | 0.0157 (3)  | −0.0041 (3)   | 0.0017 (3)    | −0.0045 (3)   |
| F15 | 0.0735 (6)   | 0.0236 (3)  | 0.0241 (3)  | −0.0180 (3)   | 0.0022 (3)    | −0.0115 (2)   |
| F16 | 0.0496 (4)   | 0.0247 (3)  | 0.0138 (2)  | −0.0056 (3)   | 0.0057 (2)    | −0.0031 (2)   |
| F17 | 0.0456 (4)   | 0.0247 (3)  | 0.0256 (3)  | 0.0092 (3)    | 0.0019 (3)    | −0.0059 (2)   |
| C18 | 0.0136 (3)   | 0.0182 (3)  | 0.0128 (3)  | −0.0026 (2)   | 0.0022 (2)    | 0.0006 (2)    |
| C19 | 0.0178 (3)   | 0.0176 (3)  | 0.0133 (3)  | −0.0046 (2)   | 0.0009 (2)    | 0.0015 (2)    |
| C20 | 0.0231 (4)   | 0.0326 (5)  | 0.0212 (4)  | −0.0074 (3)   | 0.0044 (3)    | 0.0086 (3)    |
| C21 | 0.0360 (5)   | 0.0366 (5)  | 0.0216 (4)  | −0.0161 (4)   | −0.0009 (4)   | 0.0113 (4)    |
| C22 | 0.0099 (2)   | 0.0108 (2)  | 0.0123 (2)  | −0.00317 (18) | 0.00061 (19)  | −0.00101 (19) |
| O23 | 0.00987 (19) | 0.0156 (2)  | 0.0188 (2)  | −0.00359 (16) | −0.00267 (17) | −0.00076 (18) |
| N24 | 0.0142 (2)   | 0.0103 (2)  | 0.0158 (3)  | −0.00238 (18) | −0.00209 (19) | −0.00066 (18) |
| C25 | 0.0200 (3)   | 0.0106 (3)  | 0.0219 (3)  | −0.0059 (2)   | 0.0013 (3)    | −0.0017 (2)   |
| C26 | 0.0333 (5)   | 0.0180 (3)  | 0.0235 (4)  | −0.0095 (3)   | −0.0026 (3)   | −0.0070 (3)   |

|     |            |            |            |             |             |             |
|-----|------------|------------|------------|-------------|-------------|-------------|
| C27 | 0.0308 (5) | 0.0219 (4) | 0.0482 (7) | −0.0153 (4) | 0.0141 (5)  | −0.0037 (4) |
| C28 | 0.0328 (5) | 0.0119 (3) | 0.0351 (5) | 0.0003 (3)  | −0.0043 (4) | −0.0006 (3) |

*Geometric parameters (Å, °)*

|          |             |               |             |
|----------|-------------|---------------|-------------|
| I1—C5    | 2.0941 (7)  | C18—H18B      | 0.967 (14)  |
| N1—C9    | 1.3574 (10) | C19—C20       | 1.5228 (12) |
| N1—C2    | 1.3969 (10) | C19—H19A      | 0.960 (14)  |
| N1—H1    | 0.807 (14)  | C19—H19B      | 0.983 (14)  |
| C2—C3    | 1.3837 (10) | C20—C21       | 1.5189 (14) |
| C2—C7    | 1.3970 (9)  | C20—H20A      | 0.910 (16)  |
| C3—C4    | 1.3981 (11) | C20—H20B      | 0.990 (16)  |
| C3—H3    | 0.954 (13)  | C21—H21A      | 1.007 (19)  |
| C4—C5    | 1.3943 (10) | C21—H21B      | 0.992 (19)  |
| C4—H4    | 0.948 (13)  | C21—H21C      | 0.968 (19)  |
| C5—C6    | 1.4002 (10) | C22—O23       | 1.2334 (9)  |
| C6—C7    | 1.3824 (10) | C22—N24       | 1.3306 (9)  |
| C6—H6    | 0.940 (13)  | N24—C25       | 1.4884 (10) |
| C7—C8    | 1.5127 (10) | N24—H24       | 0.824 (13)  |
| C8—N11   | 1.4728 (9)  | C25—C27       | 1.5279 (13) |
| C8—C9    | 1.5584 (10) | C25—C28       | 1.5288 (13) |
| C8—C22   | 1.5639 (9)  | C25—C26       | 1.5295 (13) |
| C9—O10   | 1.2214 (9)  | C26—H26A      | 0.971 (17)  |
| N11—C12  | 1.3559 (10) | C26—H26B      | 0.971 (17)  |
| N11—C18  | 1.4805 (10) | C26—H26C      | 0.924 (17)  |
| C12—O13  | 1.2188 (11) | C27—H27A      | 0.94 (2)    |
| C12—C14  | 1.5523 (12) | C27—H27B      | 0.98 (2)    |
| C14—F15  | 1.3277 (13) | C27—H27C      | 0.975 (19)  |
| C14—F17  | 1.3388 (14) | C28—H28A      | 0.989 (18)  |
| C14—F16  | 1.3389 (11) | C28—H28B      | 0.971 (18)  |
| C18—C19  | 1.5269 (11) | C28—H28C      | 0.969 (18)  |
| C18—H18A | 0.970 (14)  |               |             |
| C9—N1—C2 | 111.75 (6)  | C20—C19—C18   | 110.60 (7)  |
| C9—N1—H1 | 123.2 (10)  | C20—C19—H19A  | 110.6 (8)   |
| C2—N1—H1 | 125.0 (10)  | C18—C19—H19A  | 108.8 (8)   |
| C3—C2—N1 | 128.49 (7)  | C20—C19—H19B  | 109.3 (8)   |
| C3—C2—C7 | 121.66 (7)  | C18—C19—H19B  | 110.5 (8)   |
| N1—C2—C7 | 109.83 (6)  | H19A—C19—H19B | 107.1 (11)  |
| C2—C3—C4 | 117.91 (7)  | C21—C20—C19   | 113.28 (9)  |
| C2—C3—H3 | 120.6 (8)   | C21—C20—H20A  | 109.8 (10)  |
| C4—C3—H3 | 121.5 (8)   | C19—C20—H20A  | 108.7 (10)  |
| C5—C4—C3 | 120.16 (7)  | C21—C20—H20B  | 109.4 (9)   |
| C5—C4—H4 | 122.2 (8)   | C19—C20—H20B  | 108.3 (9)   |
| C3—C4—H4 | 117.7 (8)   | H20A—C20—H20B | 107.2 (14)  |
| C4—C5—C6 | 121.85 (7)  | C20—C21—H21A  | 110.2 (11)  |
| C4—C5—I1 | 119.27 (5)  | C20—C21—H21B  | 111.4 (11)  |
| C6—C5—I1 | 118.88 (5)  | H21A—C21—H21B | 107.8 (15)  |
| C7—C6—C5 | 117.37 (6)  | C20—C21—H21C  | 111.8 (11)  |
| C7—C6—H6 | 119.5 (8)   | H21A—C21—H21C | 109.1 (15)  |
| C5—C6—H6 | 123.1 (8)   | H21B—C21—H21C | 106.3 (15)  |
| C6—C7—C2 | 121.02 (6)  | O23—C22—N24   | 125.00 (7)  |

|               |             |                 |              |
|---------------|-------------|-----------------|--------------|
| C6—C7—C8      | 130.44 (6)  | O23—C22—C8      | 119.06 (6)   |
| C2—C7—C8      | 108.54 (6)  | N24—C22—C8      | 115.90 (6)   |
| N11—C8—C7     | 113.38 (6)  | C22—N24—C25     | 125.99 (7)   |
| N11—C8—C9     | 113.12 (6)  | C22—N24—H24     | 117.7 (9)    |
| C7—C8—C9      | 101.34 (5)  | C25—N24—H24     | 116.2 (9)    |
| N11—C8—C22    | 110.95 (6)  | N24—C25—C27     | 109.74 (7)   |
| C7—C8—C22     | 108.31 (5)  | N24—C25—C28     | 105.71 (7)   |
| C9—C8—C22     | 109.25 (5)  | C27—C25—C28     | 110.65 (8)   |
| O10—C9—N1     | 127.07 (7)  | N24—C25—C26     | 109.87 (7)   |
| O10—C9—C8     | 125.08 (7)  | C27—C25—C26     | 111.30 (9)   |
| N1—C9—C8      | 107.62 (6)  | C28—C25—C26     | 109.42 (8)   |
| C12—N11—C8    | 113.23 (6)  | C25—C26—H26A    | 109.4 (10)   |
| C12—N11—C18   | 124.07 (7)  | C25—C26—H26B    | 109.6 (10)   |
| C8—N11—C18    | 122.48 (6)  | H26A—C26—H26B   | 113.2 (14)   |
| O13—C12—N11   | 124.06 (8)  | C25—C26—H26C    | 109.0 (10)   |
| O13—C12—C14   | 117.79 (8)  | H26A—C26—H26C   | 109.5 (14)   |
| N11—C12—C14   | 117.93 (8)  | H26B—C26—H26C   | 106.0 (14)   |
| F15—C14—F17   | 107.65 (8)  | C25—C27—H27A    | 110.7 (12)   |
| F15—C14—F16   | 107.35 (8)  | C25—C27—H27B    | 109.8 (11)   |
| F17—C14—F16   | 107.85 (9)  | H27A—C27—H27B   | 107.1 (16)   |
| F15—C14—C12   | 109.69 (9)  | C25—C27—H27C    | 111.9 (11)   |
| F17—C14—C12   | 110.10 (8)  | H27A—C27—H27C   | 108.0 (16)   |
| F16—C14—C12   | 113.97 (7)  | H27B—C27—H27C   | 109.2 (16)   |
| N11—C18—C19   | 113.67 (6)  | C25—C28—H28A    | 107.9 (10)   |
| N11—C18—H18A  | 106.4 (8)   | C25—C28—H28B    | 110.8 (11)   |
| C19—C18—H18A  | 111.5 (8)   | H28A—C28—H28B   | 110.1 (15)   |
| N11—C18—H18B  | 107.8 (8)   | C25—C28—H28C    | 109.1 (11)   |
| C19—C18—H18B  | 110.1 (8)   | H28A—C28—H28C   | 111.5 (14)   |
| H18A—C18—H18B | 107.0 (11)  | H28B—C28—H28C   | 107.5 (15)   |
|               |             |                 |              |
| C9—N1—C2—C3   | 175.13 (7)  | C9—C8—N11—C12   | 55.44 (8)    |
| C9—N1—C2—C7   | −3.42 (9)   | C22—C8—N11—C12  | 178.62 (6)   |
| N1—C2—C3—C4   | −178.33 (7) | C7—C8—N11—C18   | 125.90 (7)   |
| C7—C2—C3—C4   | 0.06 (11)   | C9—C8—N11—C18   | −119.43 (7)  |
| C2—C3—C4—C5   | 1.28 (11)   | C22—C8—N11—C18  | 3.75 (9)     |
| C3—C4—C5—C6   | −1.31 (11)  | C8—N11—C12—O13  | −6.82 (12)   |
| C3—C4—C5—I1   | 178.23 (5)  | C18—N11—C12—O13 | 167.96 (8)   |
| C4—C5—C6—C7   | −0.06 (10)  | C8—N11—C12—C14  | 167.56 (7)   |
| I1—C5—C6—C7   | −179.60 (5) | C18—N11—C12—C14 | −17.66 (11)  |
| C5—C6—C7—C2   | 1.42 (10)   | O13—C12—C14—F15 | −4.22 (12)   |
| C5—C6—C7—C8   | −177.99 (7) | N11—C12—C14—F15 | −178.96 (8)  |
| C3—C2—C7—C6   | −1.46 (11)  | O13—C12—C14—F17 | 114.07 (10)  |
| N1—C2—C7—C6   | 177.21 (6)  | N11—C12—C14—F17 | −60.67 (11)  |
| C3—C2—C7—C8   | 178.07 (6)  | O13—C12—C14—F16 | −124.61 (10) |
| N1—C2—C7—C8   | −3.27 (8)   | N11—C12—C14—F16 | 60.65 (12)   |
| C6—C7—C8—N11  | −51.43 (10) | C12—N11—C18—C19 | −84.56 (9)   |
| C2—C7—C8—N11  | 129.10 (6)  | C8—N11—C18—C19  | 89.74 (8)    |
| C6—C7—C8—C9   | −172.97 (7) | N11—C18—C19—C20 | 170.01 (7)   |
| C2—C7—C8—C9   | 7.57 (7)    | C18—C19—C20—C21 | −179.43 (9)  |
| C6—C7—C8—C22  | 72.17 (9)   | N11—C8—C22—O23  | 83.48 (8)    |
| C2—C7—C8—C22  | −107.29 (6) | C7—C8—C22—O23   | −41.57 (8)   |
| C2—N1—C9—O10  | −176.98 (8) | C9—C8—C22—O23   | −151.13 (7)  |

|               |             |                 |             |
|---------------|-------------|-----------------|-------------|
| C2—N1—C9—C8   | 8.36 (8)    | N11—C8—C22—N24  | −98.81 (7)  |
| N11—C8—C9—O10 | 53.96 (10)  | C7—C8—C22—N24   | 136.14 (6)  |
| C7—C8—C9—O10  | 175.67 (7)  | C9—C8—C22—N24   | 26.58 (8)   |
| C22—C8—C9—O10 | −70.16 (9)  | O23—C22—N24—C25 | 0.64 (12)   |
| N11—C8—C9—N1  | −131.25 (6) | C8—C22—N24—C25  | −176.91 (7) |
| C7—C8—C9—N1   | −9.54 (7)   | C22—N24—C25—C27 | −69.02 (11) |
| C22—C8—C9—N1  | 104.63 (7)  | C22—N24—C25—C28 | 171.63 (8)  |
| C7—C8—N11—C12 | −59.23 (8)  | C22—N24—C25—C26 | 53.66 (10)  |

*Hydrogen-bond geometry (Å, °)*

| <i>D</i> —H $\cdots$ <i>A</i>   | <i>D</i> —H | H $\cdots$ <i>A</i> | <i>D</i> $\cdots$ <i>A</i> | <i>D</i> —H $\cdots$ <i>A</i> |
|---------------------------------|-------------|---------------------|----------------------------|-------------------------------|
| N1—H1 $\cdots$ O23 <sup>i</sup> | 0.807 (14)  | 1.981 (14)          | 2.7819 (8)                 | 171.6 (14)                    |
| C18—H18 <i>A</i> $\cdots$ O23   | 0.970 (14)  | 2.518 (14)          | 3.2505 (10)                | 132.3 (10)                    |
| C18—H18 <i>B</i> $\cdots$ F17   | 0.967 (14)  | 2.428 (14)          | 3.1045 (11)                | 126.7 (10)                    |
| N24—H24 $\cdots$ O10            | 0.824 (13)  | 2.175 (13)          | 2.8548 (9)                 | 139.8 (12)                    |
| C26—H26 <i>B</i> $\cdots$ O23   | 0.971 (17)  | 2.460 (17)          | 3.0011 (11)                | 114.9 (12)                    |

Symmetry code: (i)  $x+1, y, z$ .
